# Supplementary material for: Stereoselective oxidation of phenoxathiin-based thiacalix[4]arenes – stereomutation of sulfoxide groups
Source: Royal Society of Chemistry journal article supplement (doi:10.1039/d3ob00530e), 2023-01-01
Supplement: d3ob00530e1.pdf [file d3ob00530e1.pdf]

Supplementary Information

## Stereoselective Oxidation of Phenoxathiin-Based Thiacalix[4]arenes – Stereomutation of Sulfoxide groups

N. Broftová,<sup>a</sup> T. Landovský,<sup>a</sup> H. Dvořáková,<sup>b</sup> V. Eigner,<sup>c</sup> M. Krupička,<sup>a</sup> and P. Lhoták<sup>a\*</sup>

<sup>a</sup>*Department of Organic Chemistry, University of Chemistry and Technology, Prague (UCTP), Technická 5, 166 28 Prague 6, Czech Republic.*

<sup>b</sup>*Laboratory of NMR Spectroscopy, UCTP, Technická 5, 166 28 Prague 6, Czech Republic.*

<sup>c</sup>*Institute of Physics AS CR v.v.i., Na Slovance 2, 182 21 Prague 8 Czech Republic.*

<sup>d</sup>*Department of Solid State Chemistry, UCTP, Technická 5, 166 28 Prague 6, Czech Republic.*

### Table of content:

|                                                  |    |
|--------------------------------------------------|----|
| 1. <b>Spectral characterization of compounds</b> | 2  |
| 2. <b>Variable temperature NMR spectra</b>       | 31 |
| 3. <b>UV/VIS spectra</b>                         | 38 |
| 4. <b>Theoretical calculations</b>               | 40 |

# 1. Spectral characterization of compounds

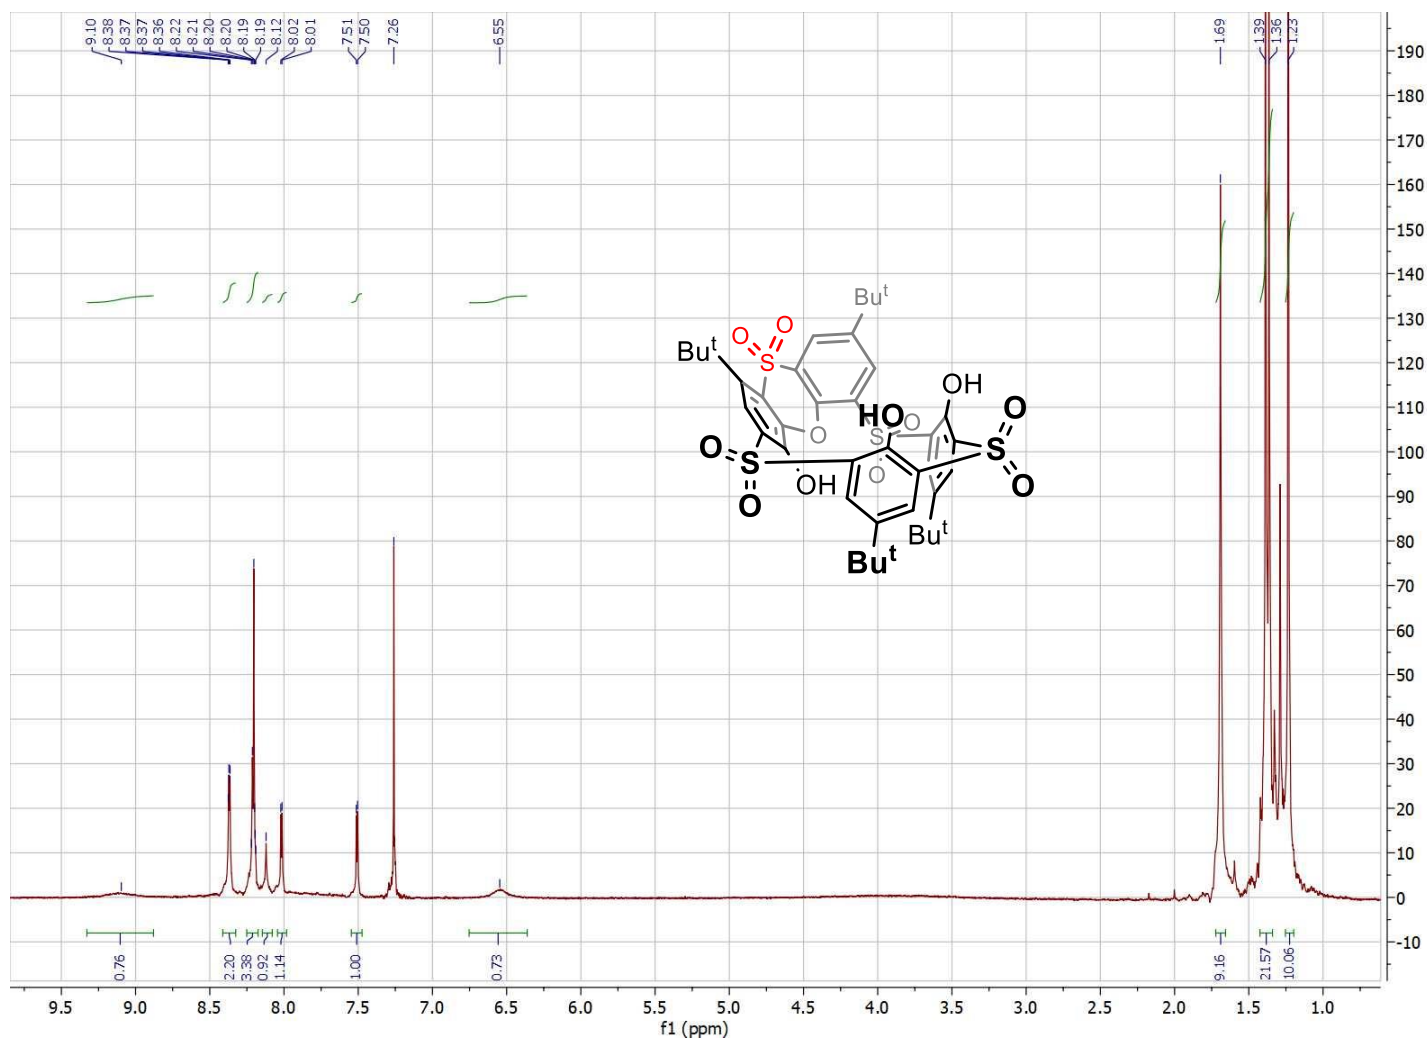

**Figure 1:** <sup>1</sup>H NMR (300 MHz, CDCl<sub>3</sub>, 298 K) spectrum of compound 4

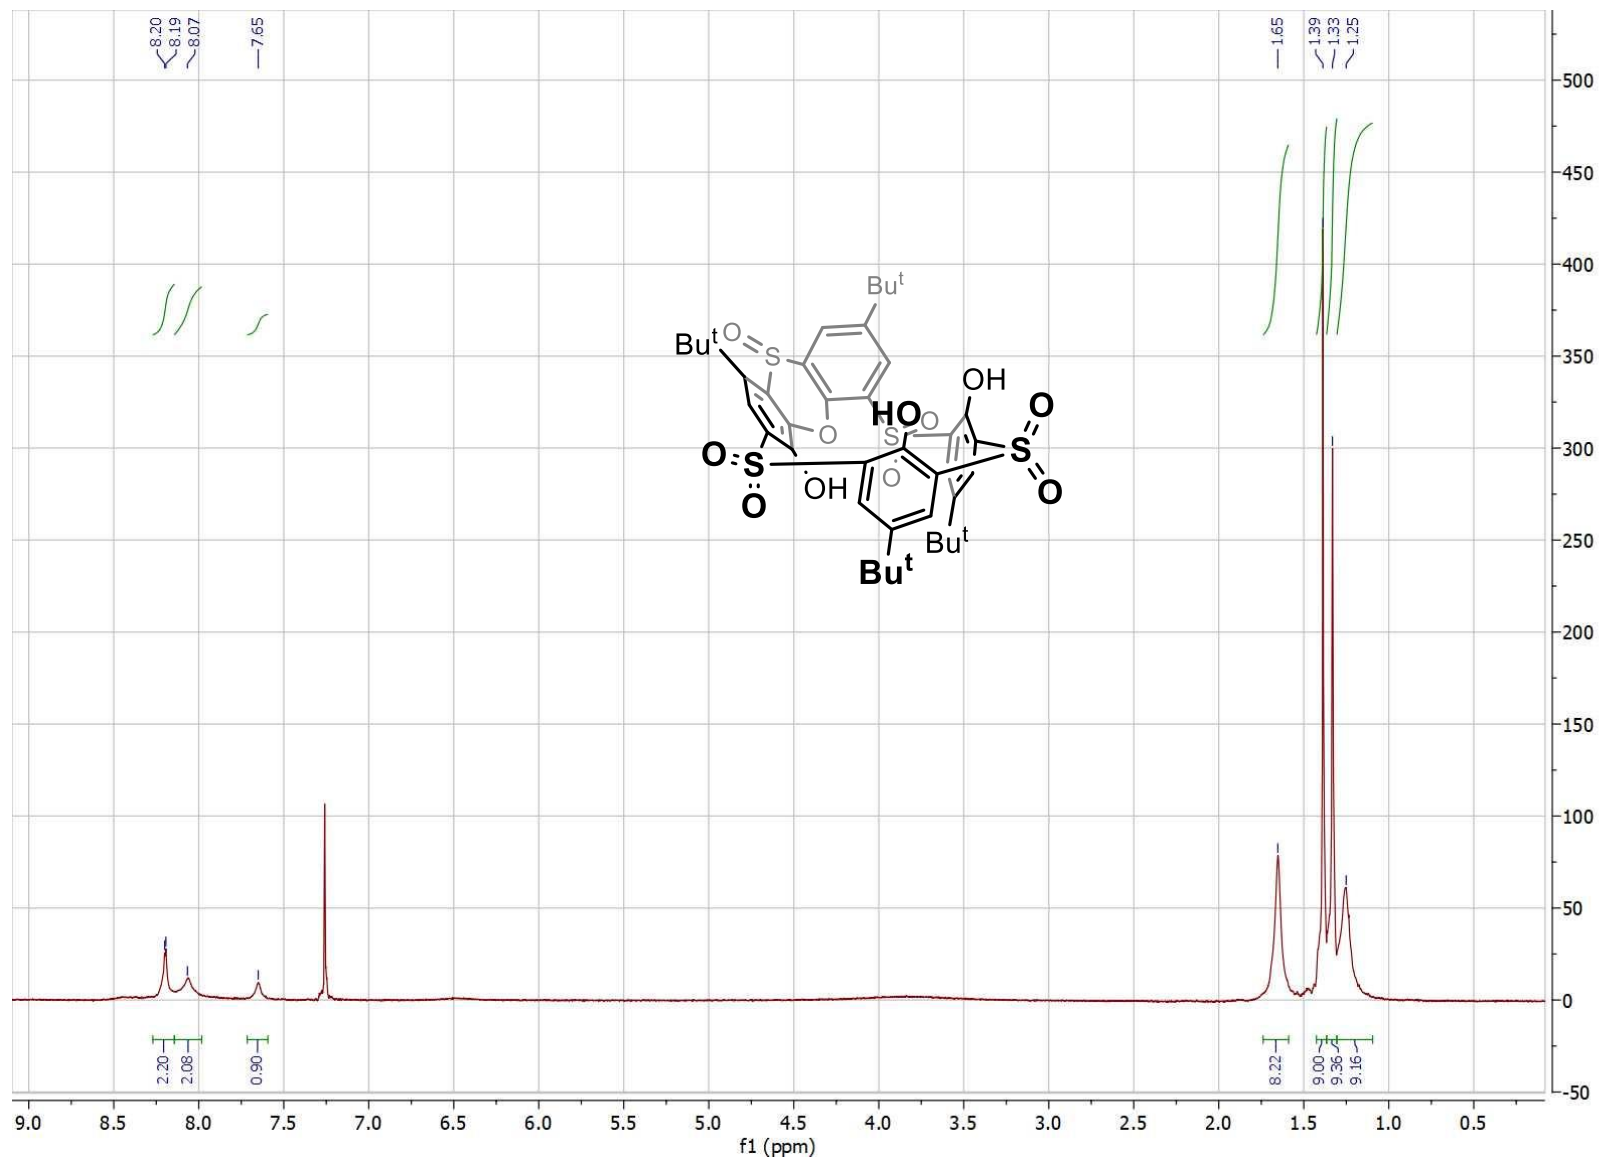

**Figure 2:** <sup>1</sup>H NMR (300 MHz, CDCl<sub>3</sub>, 298 K) spectrum of compound 8

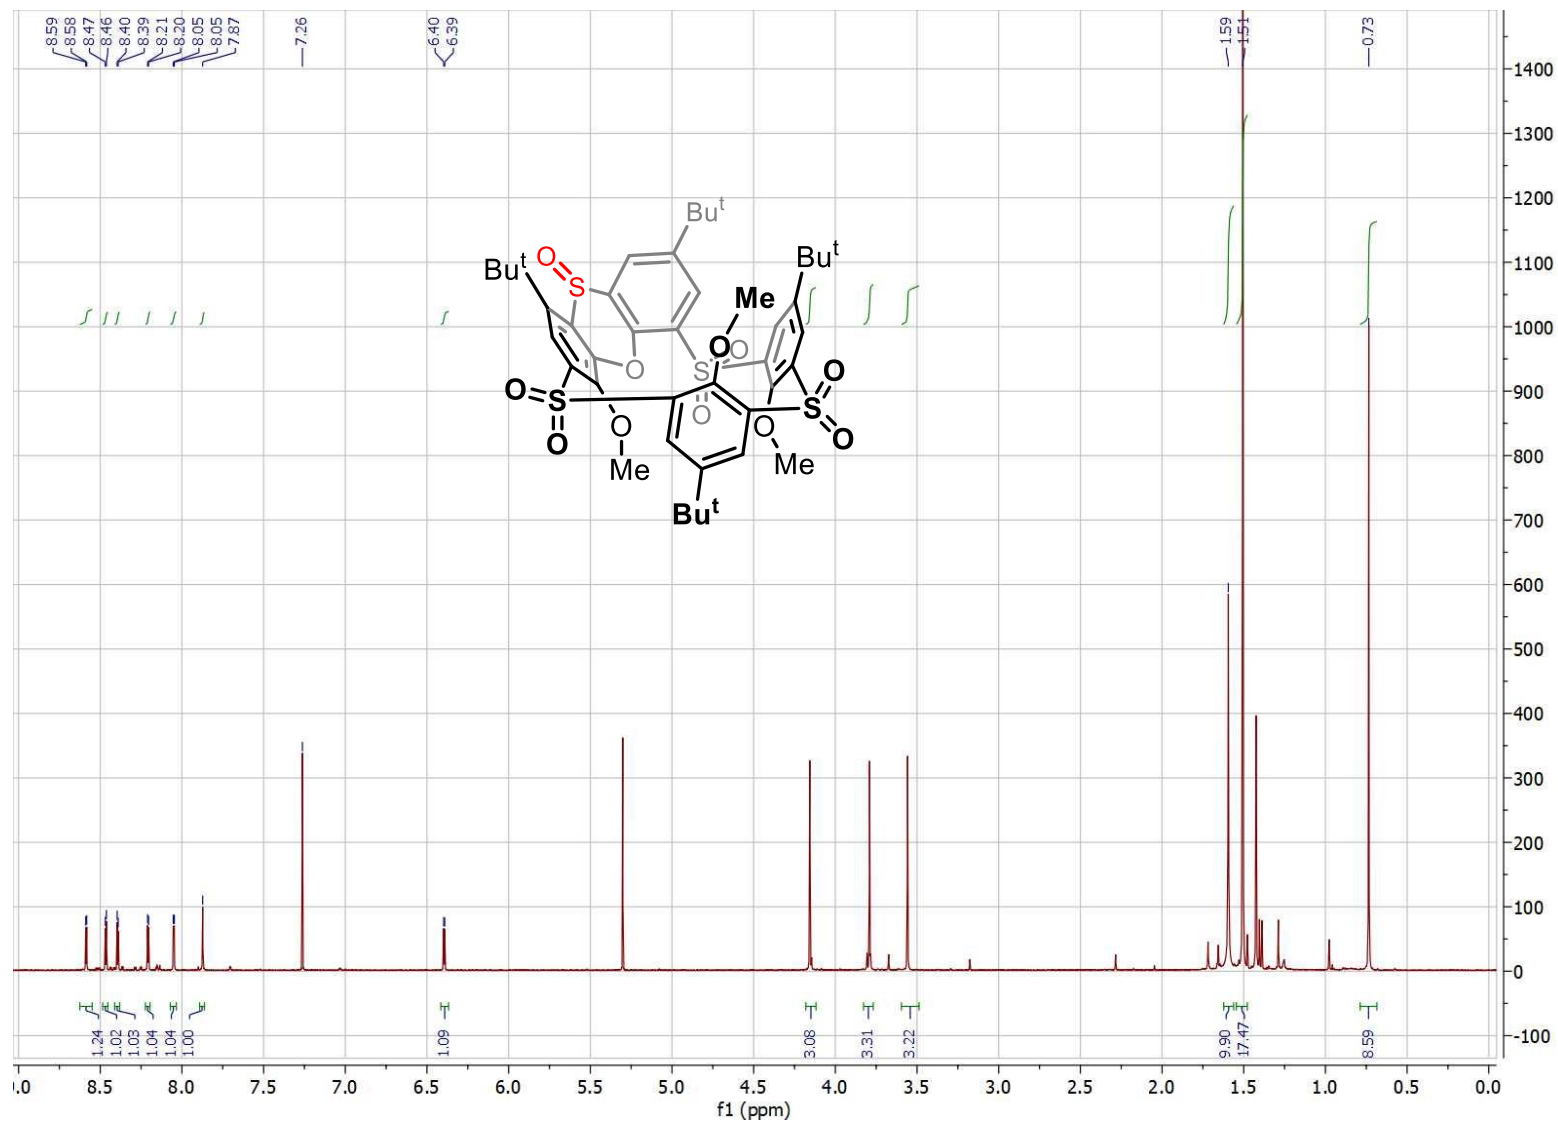

**Figure 3:**  $^1\text{H}$  NMR (400 MHz,  $\text{CDCl}_3$ , 298 K) spectrum of compound **9a**

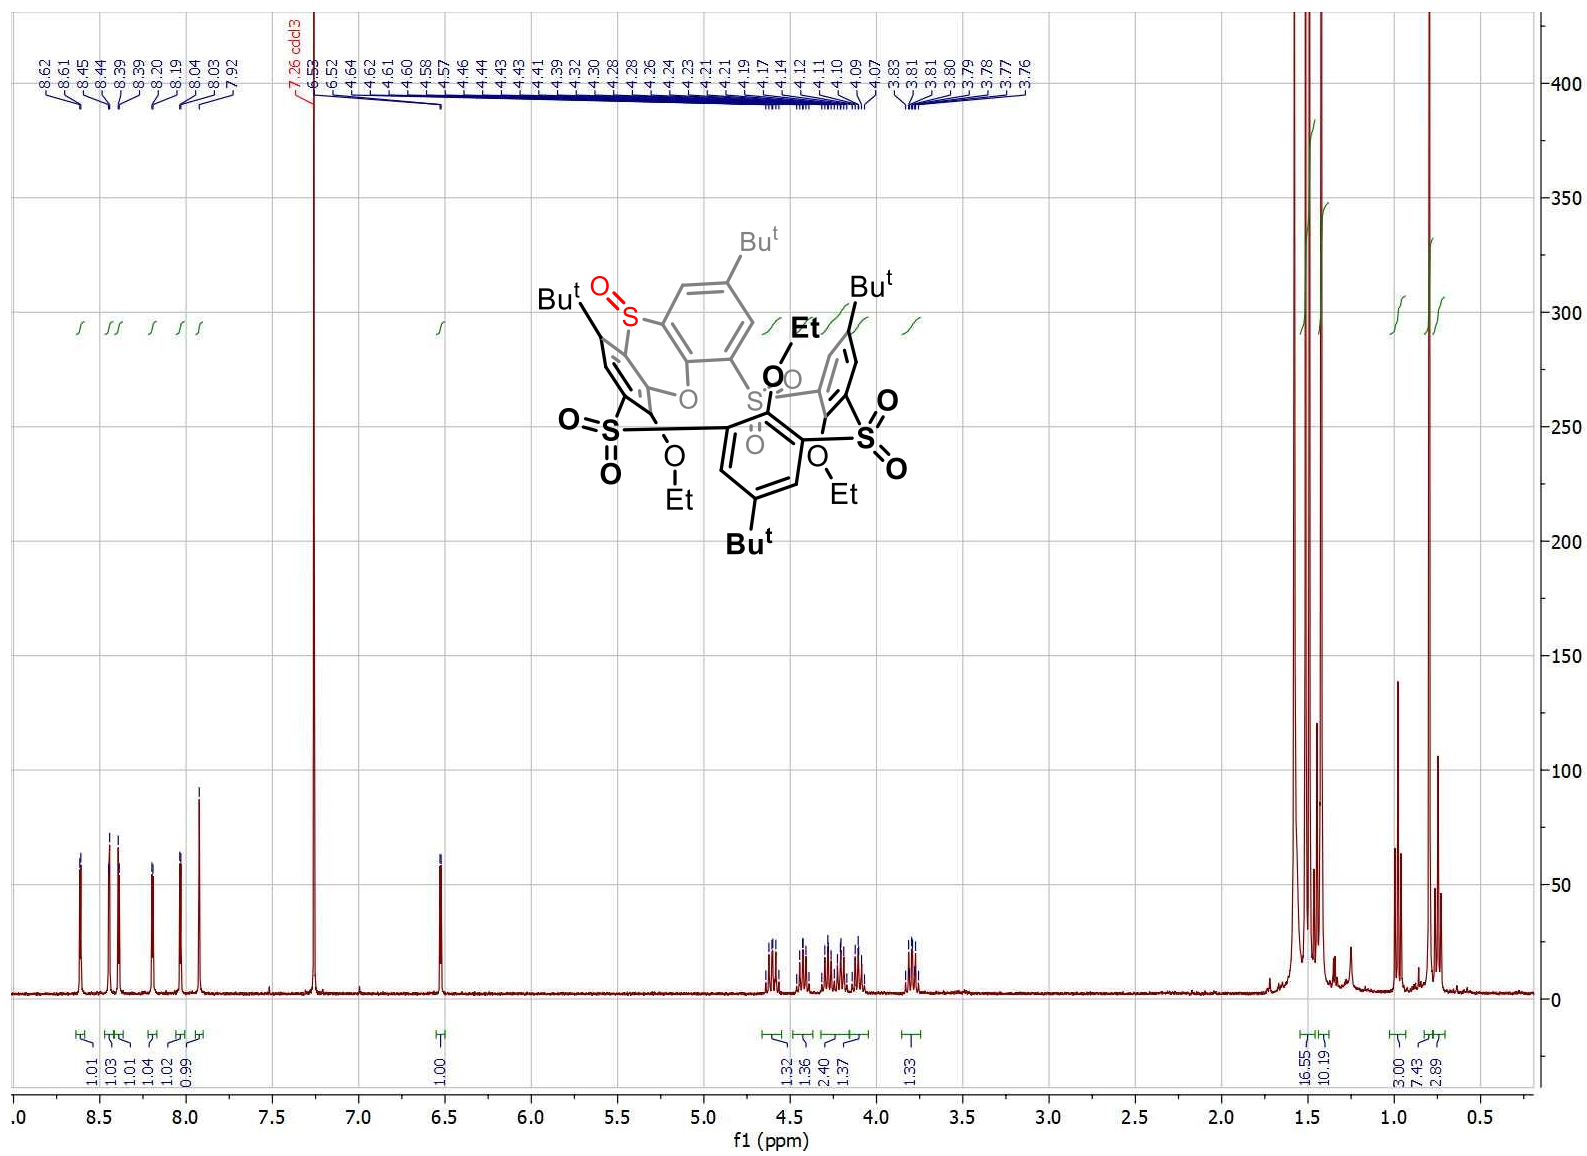

**Figure 4:** <sup>1</sup>H NMR (400 MHz, CDCl<sub>3</sub>, 298 K) spectrum of compound **9b**

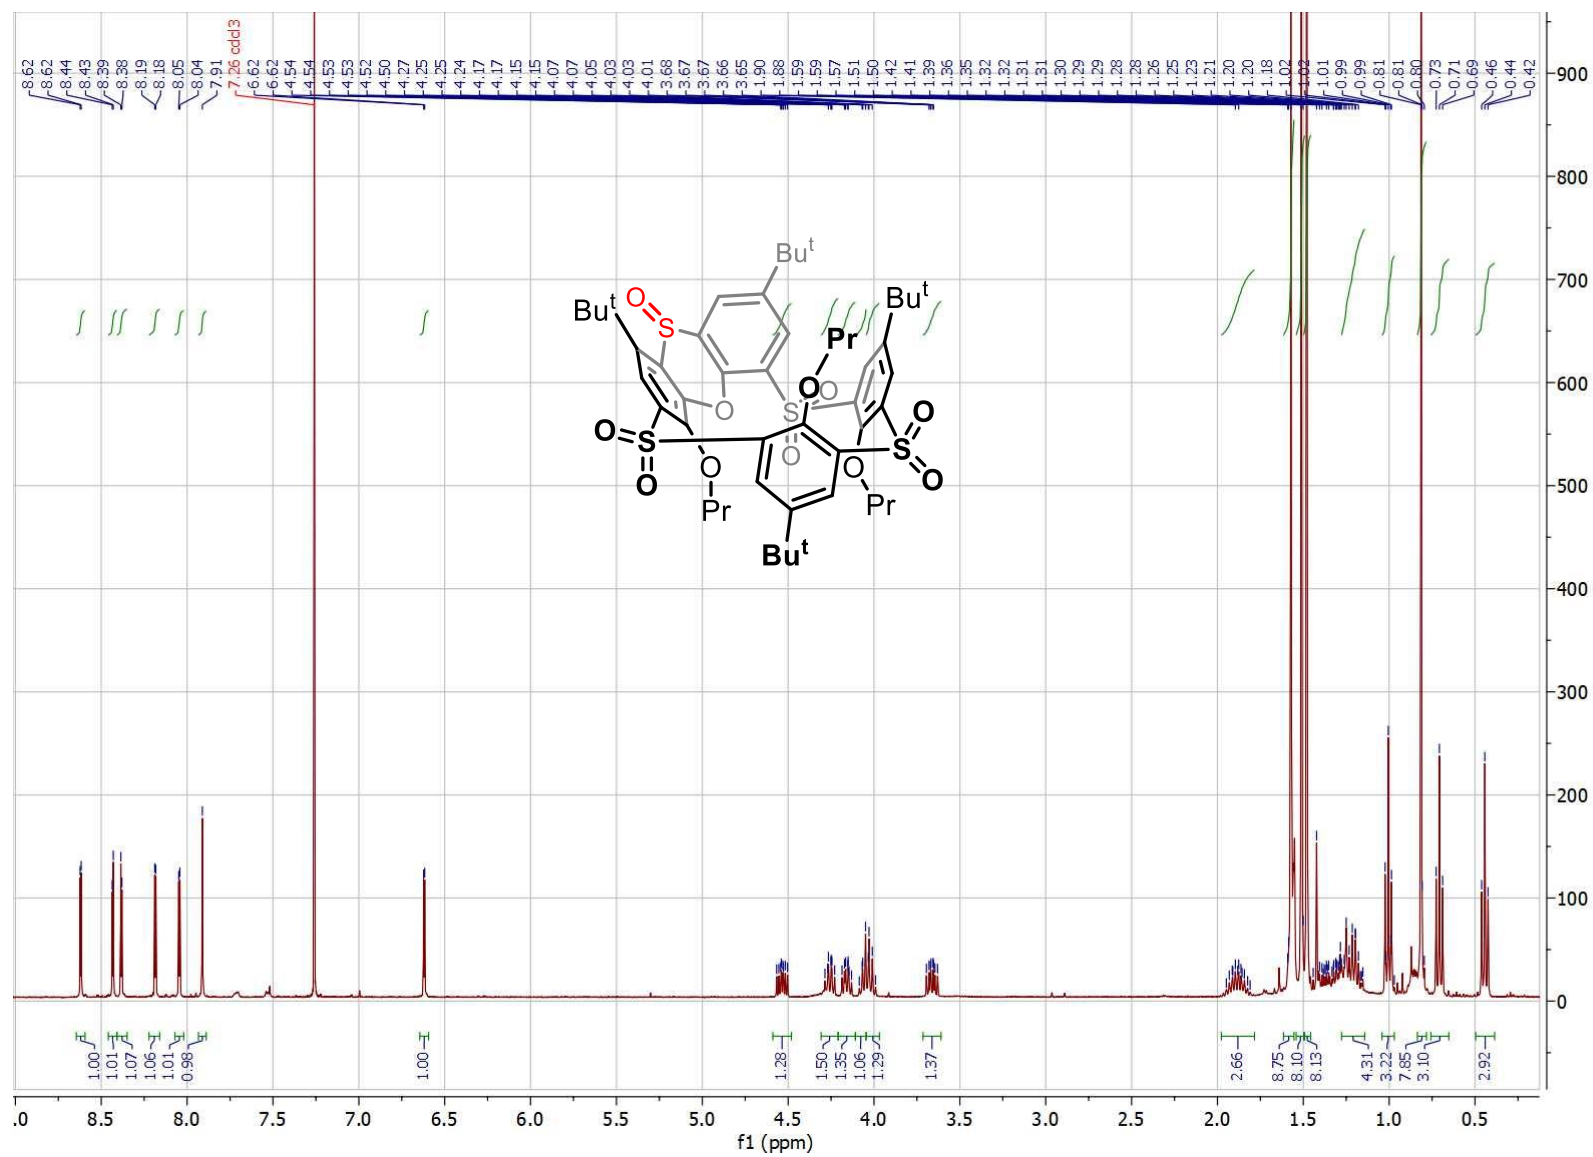

**Figure 5:**  $^1\text{H}$  NMR (400 MHz,  $\text{CDCl}_3$ , 298 K) spectrum of compound **9c**

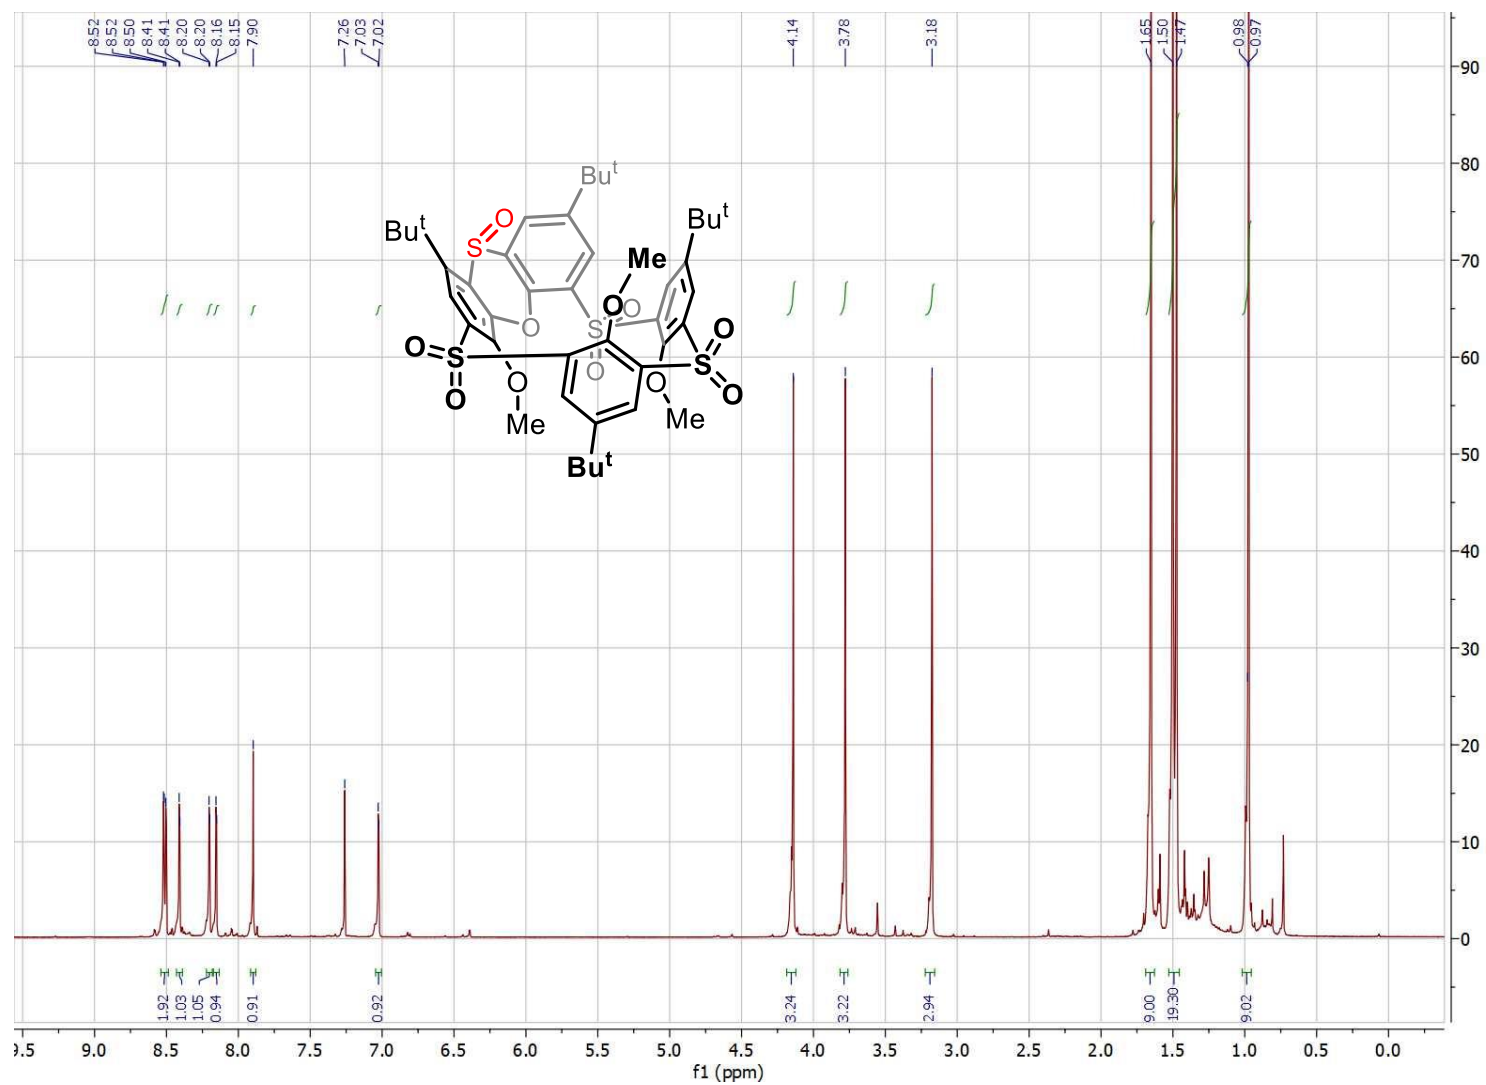

**Figure 6:**  $^1\text{H}$  NMR (500 MHz,  $\text{CDCl}_3$ , 298 K) spectrum of compound **10a**

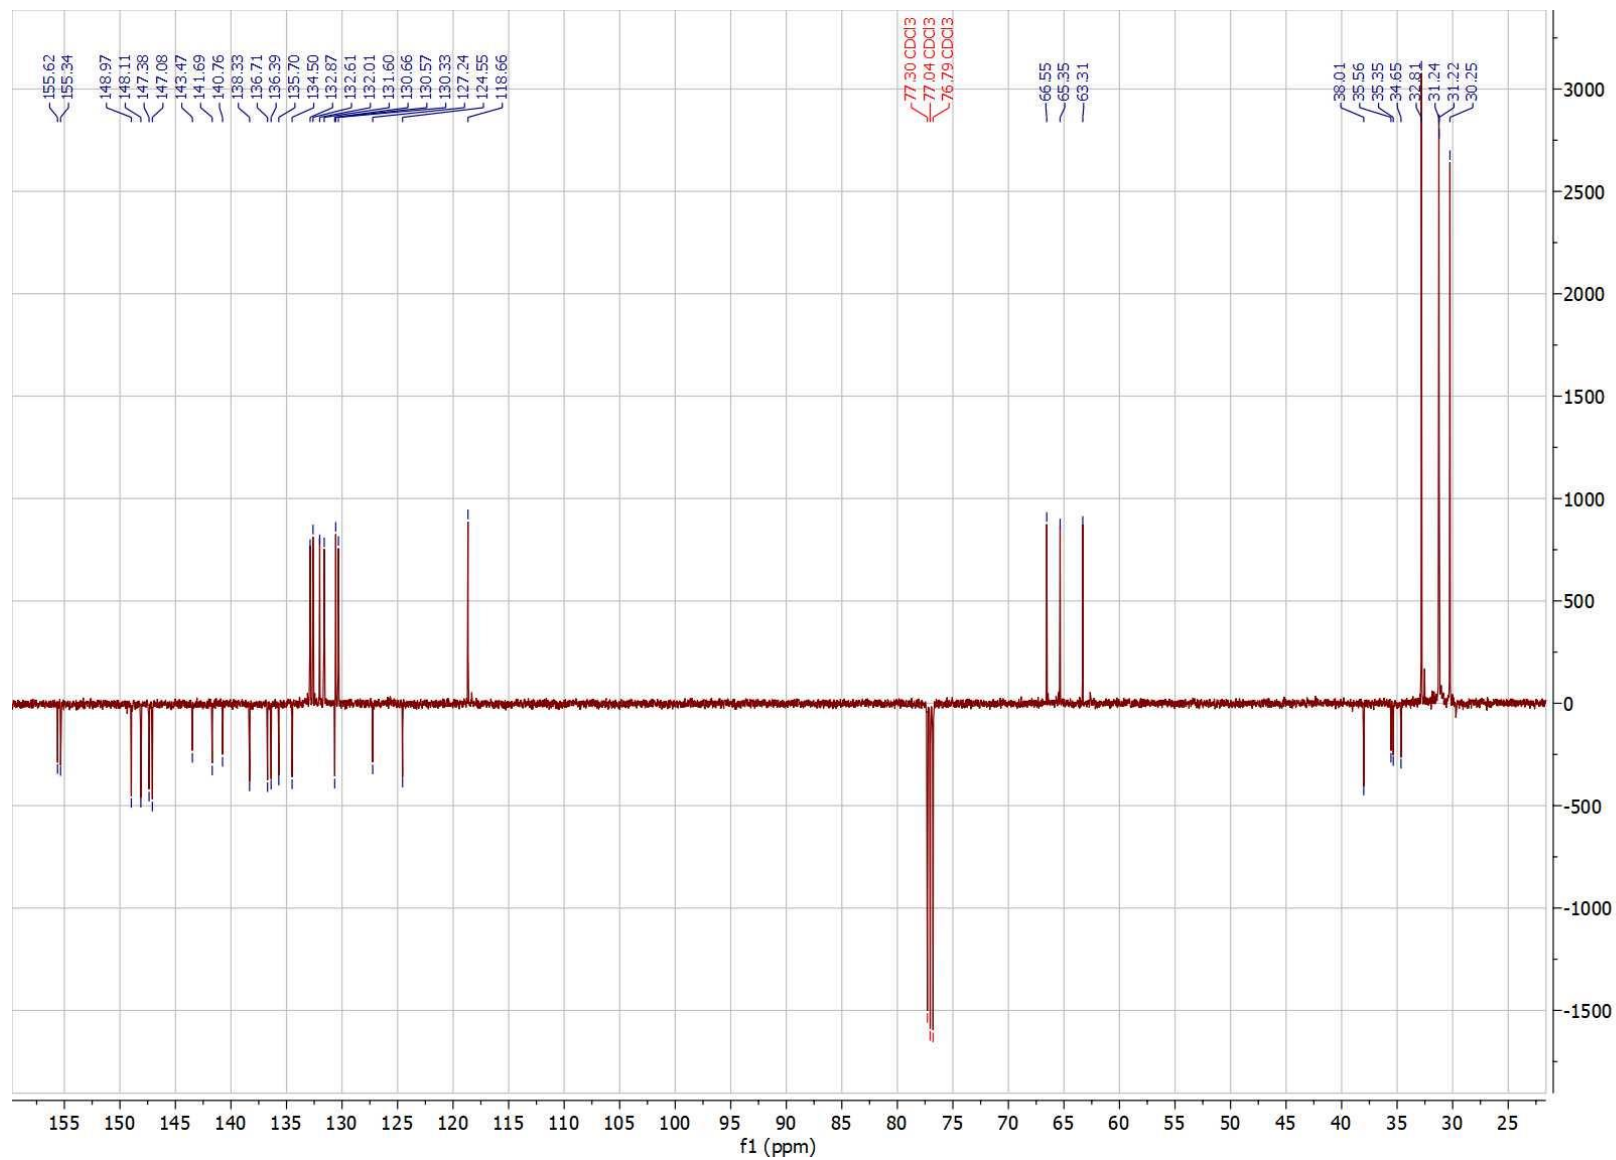

**Figure 7:**  $^{13}\text{C}$  NMR (APT, 126 MHz,  $\text{CDCl}_3$ , 298 K) spectrum of compound **10a**



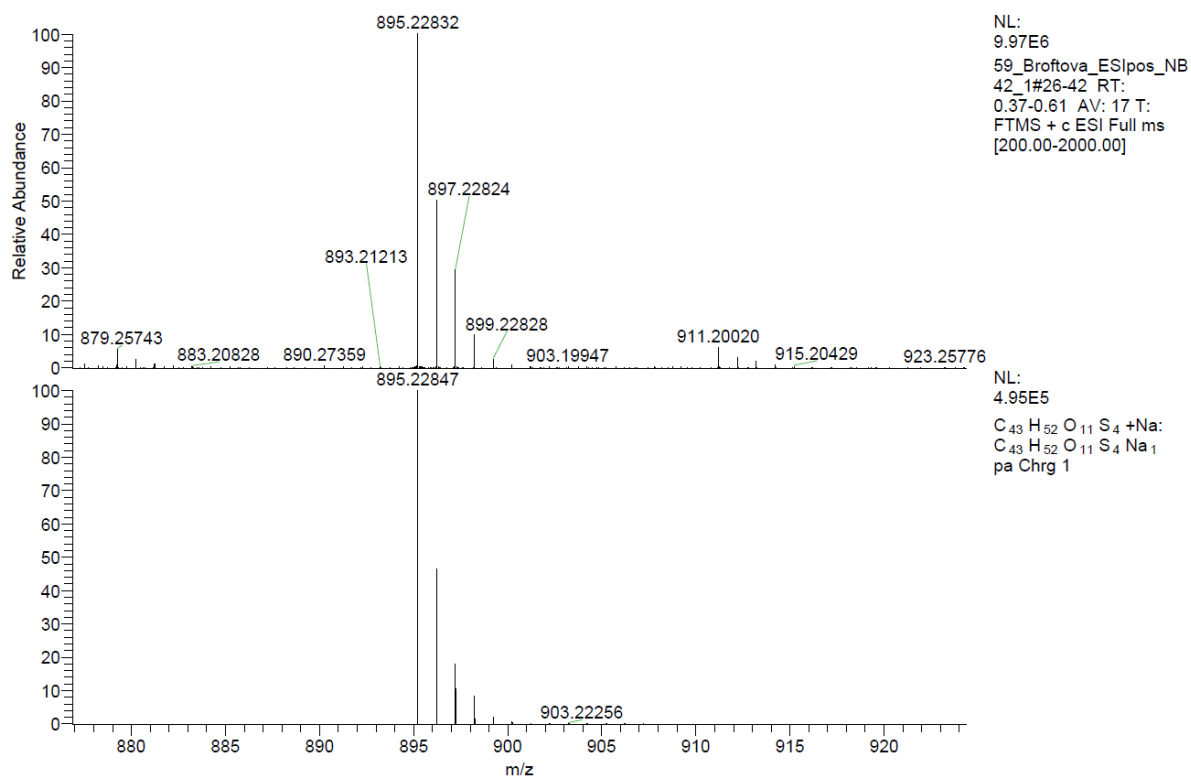

**Figure 8: HRMS ESI+ spectrum of compound 10a**

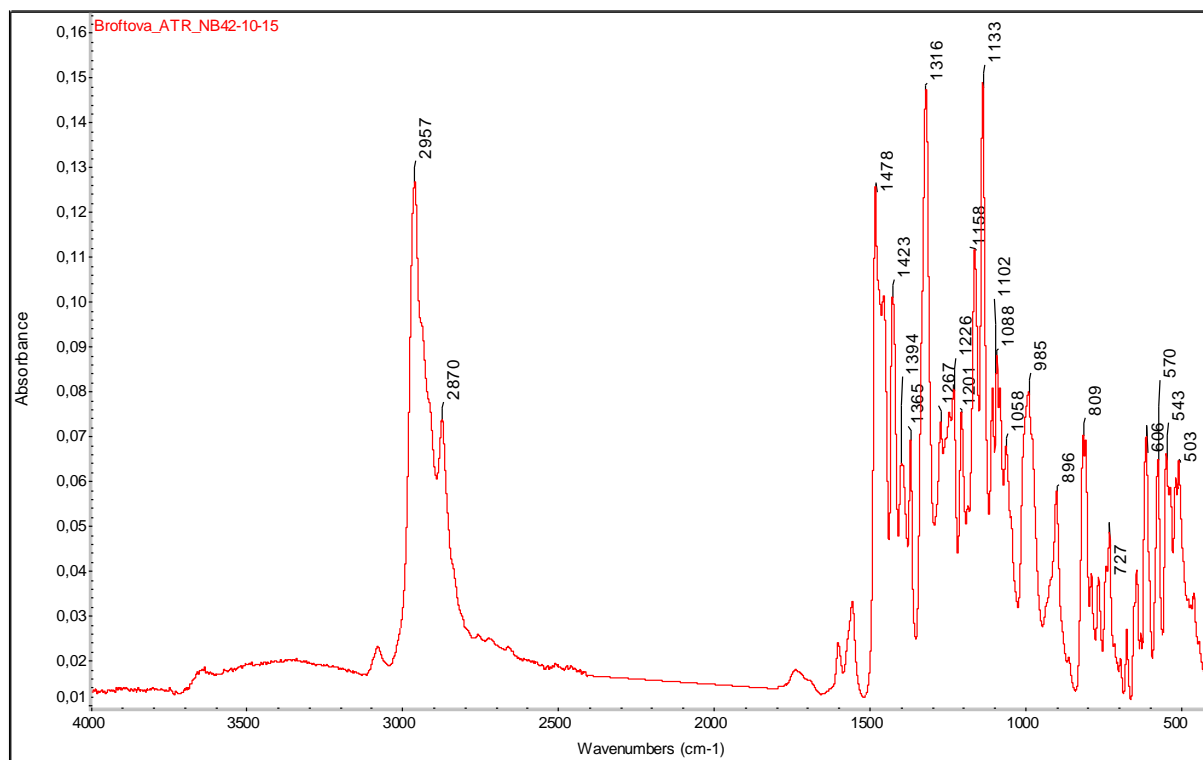

**Figure 9: IR spectrum of compound 10a**

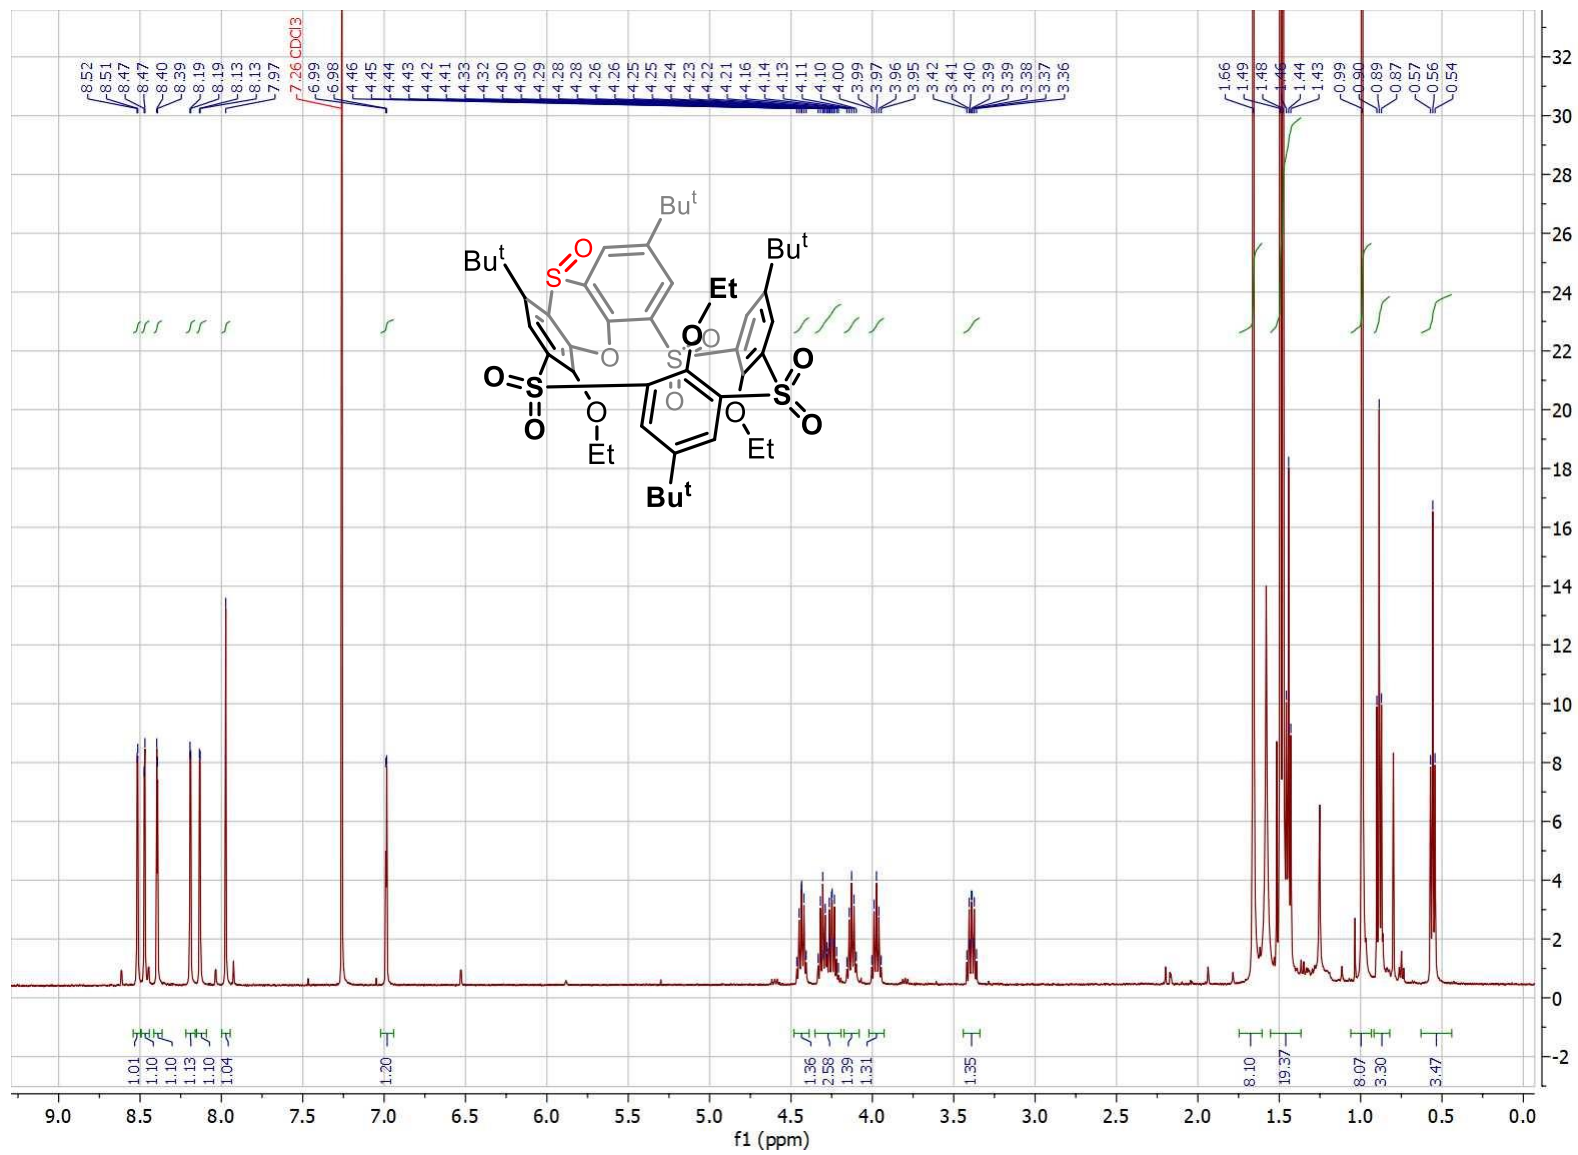

**Figure 10:** <sup>1</sup>H NMR (500 MHz, CDCl<sub>3</sub>, 298 K) spectrum of compound **10b**

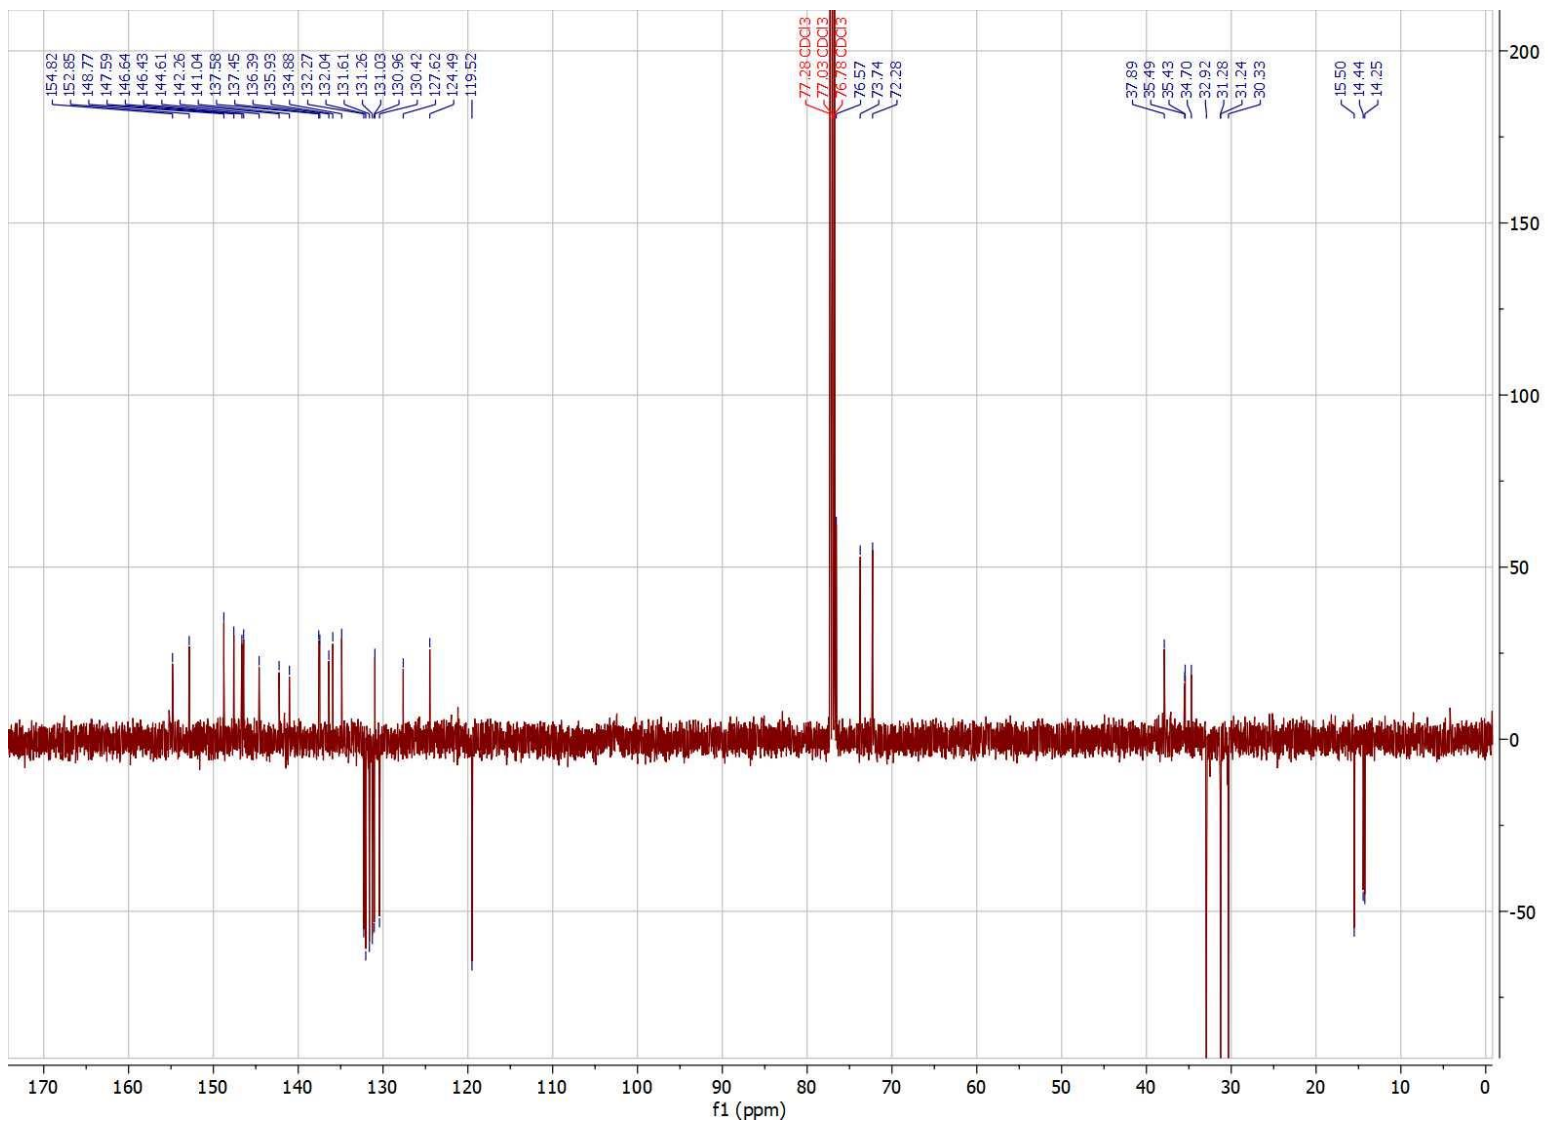

**Figure 11:**  $^{13}\text{C}$  NMR (APT, 126 MHz,  $\text{CDCl}_3$ , 298 K) spectrum of compound **10b**

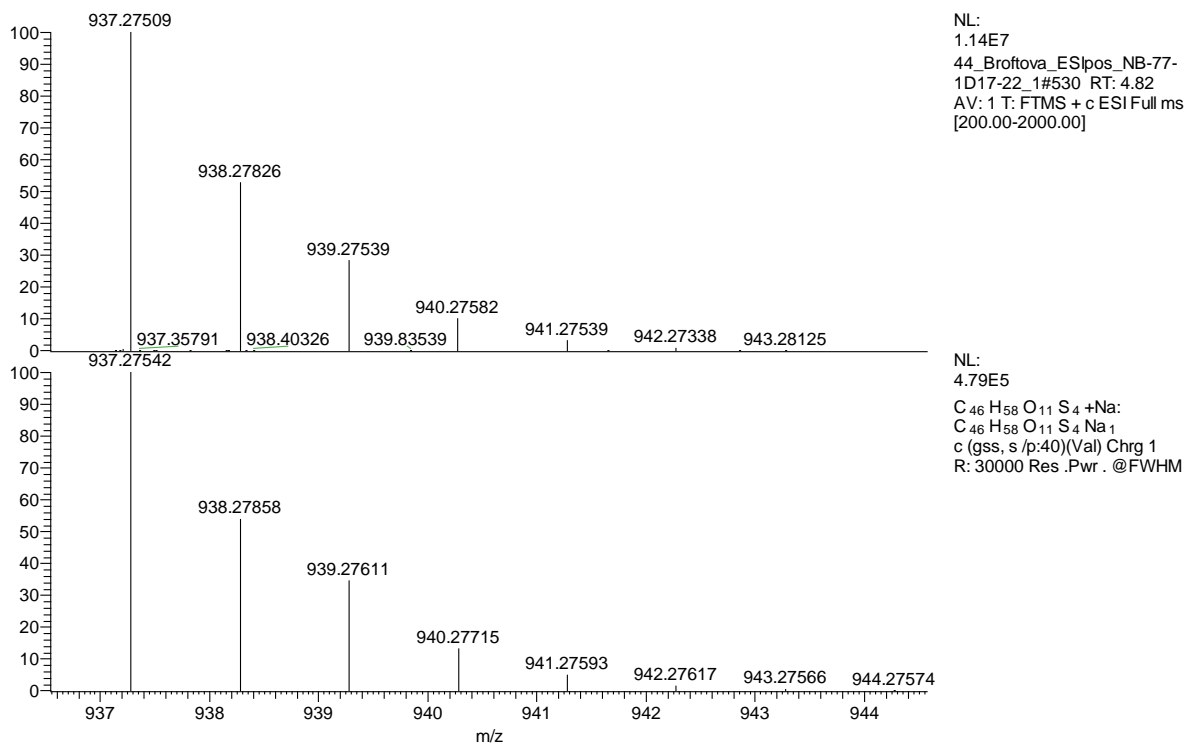

**Figure 12: HRMS ESI+ spectrum of compound 10b**

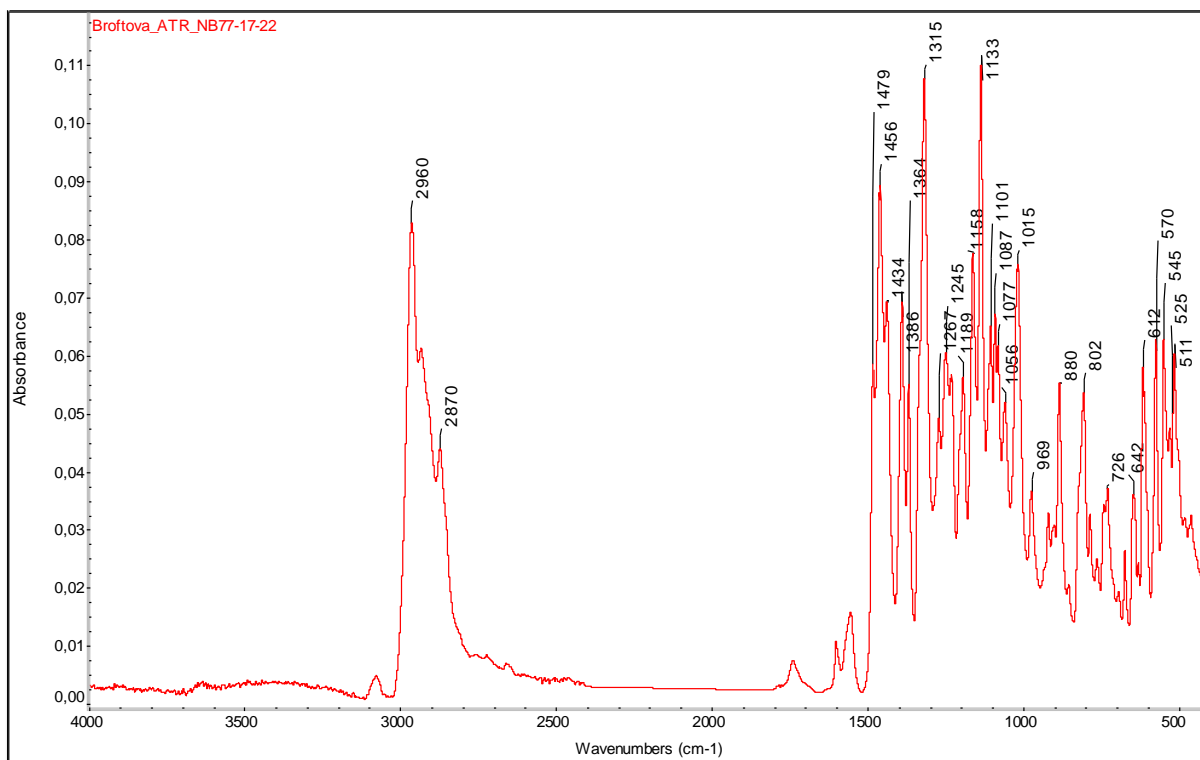

**Figure 13: IR spectrum of compound 10b**

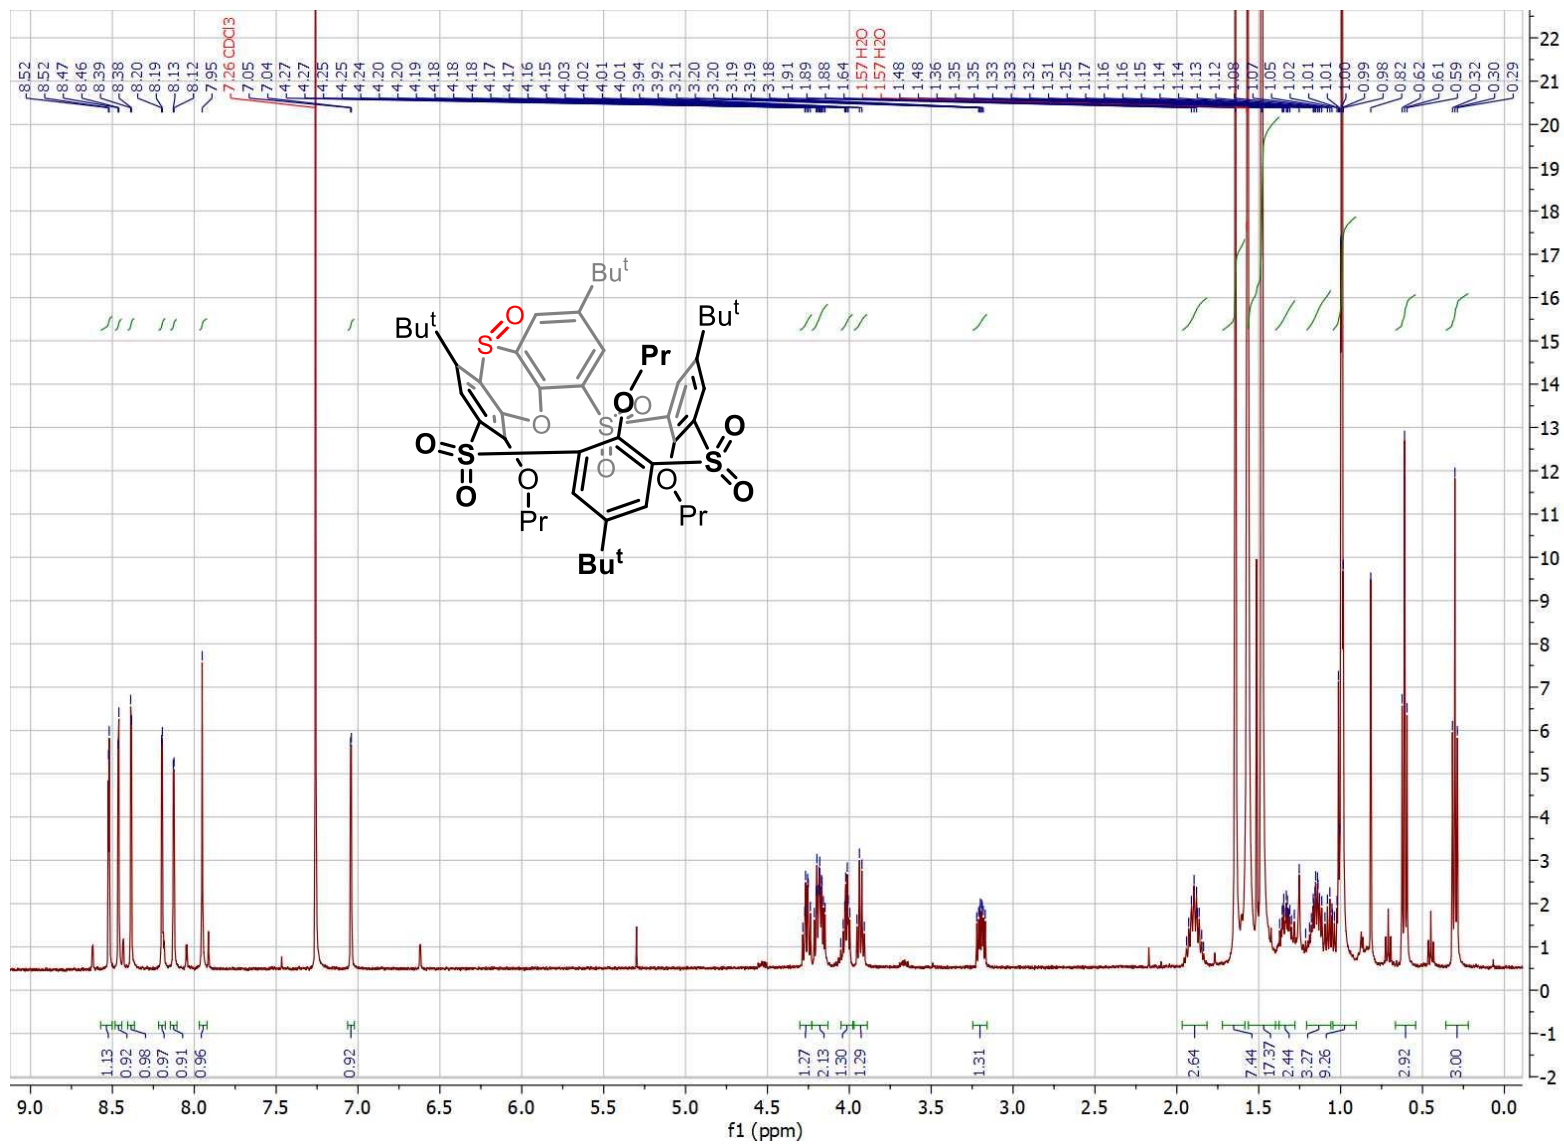

Figure 14: <sup>1</sup>H NMR (500 MHz, CDCl<sub>3</sub>, 298 K) spectrum of compound 10c

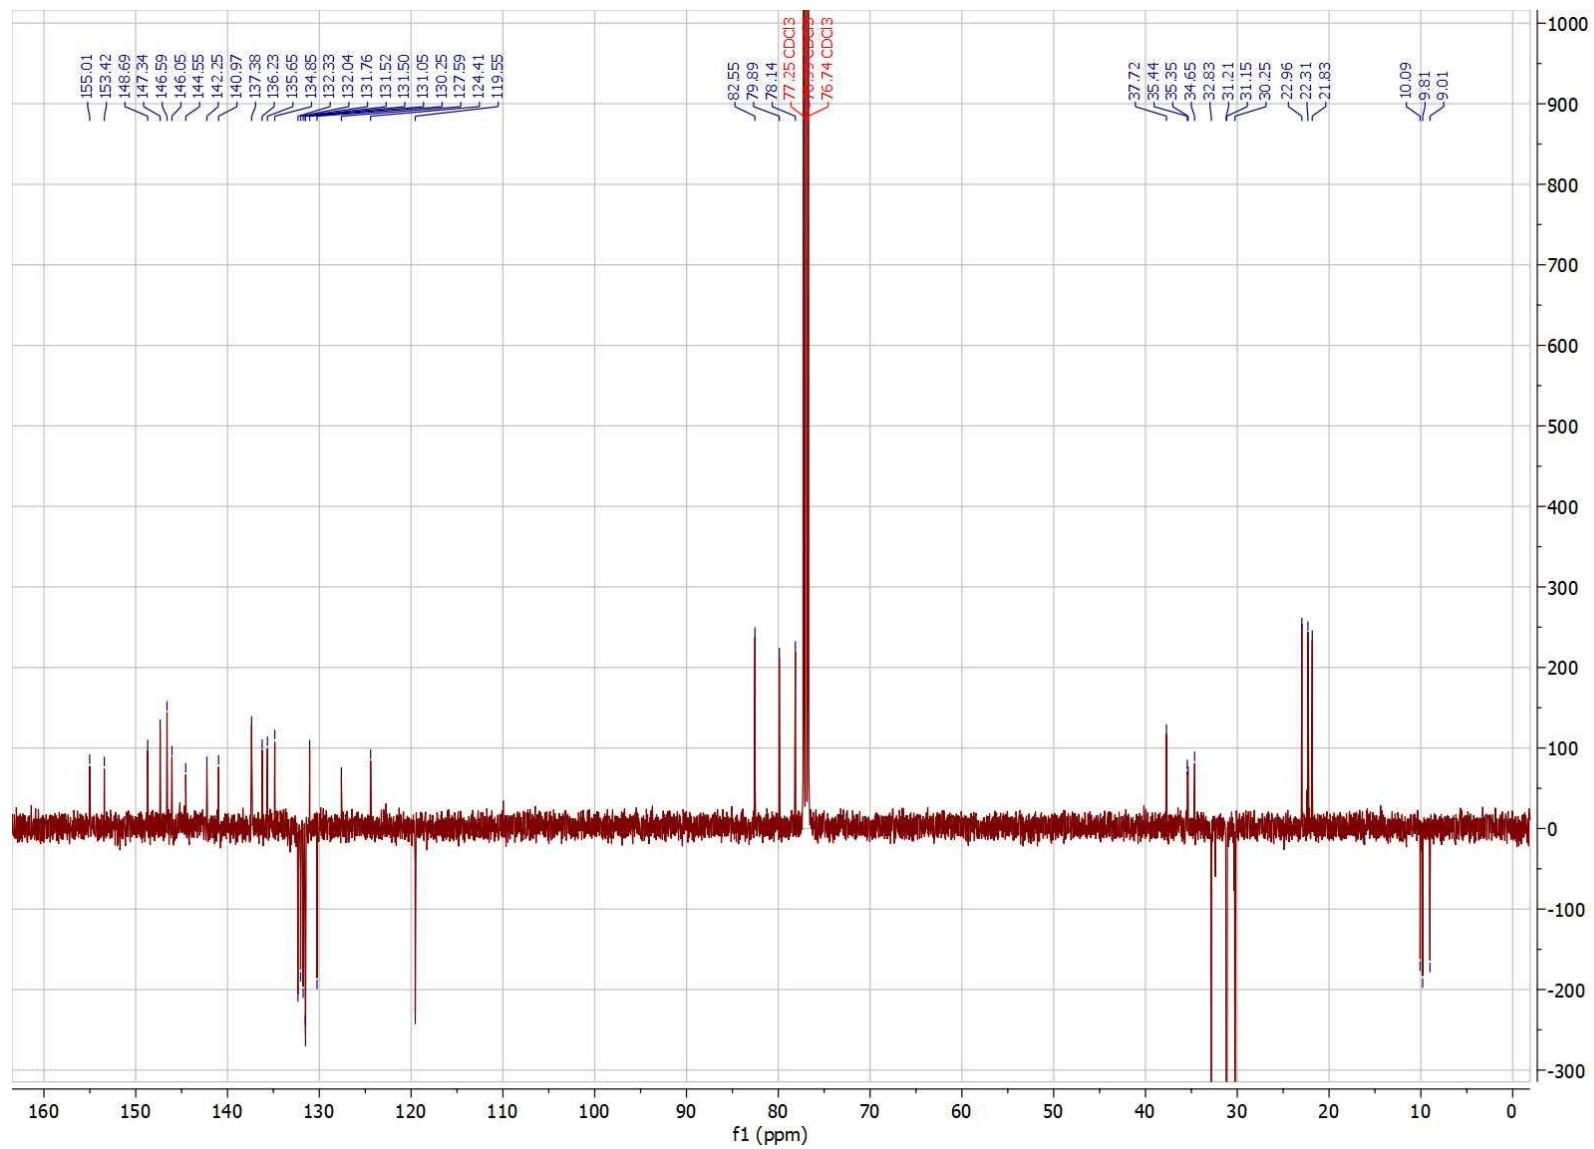

**Figure 15:**  $^{13}\text{C}$  NMR (APT, 126 MHz, CDCl<sub>3</sub>, 298 K) spectrum of compound **10c**

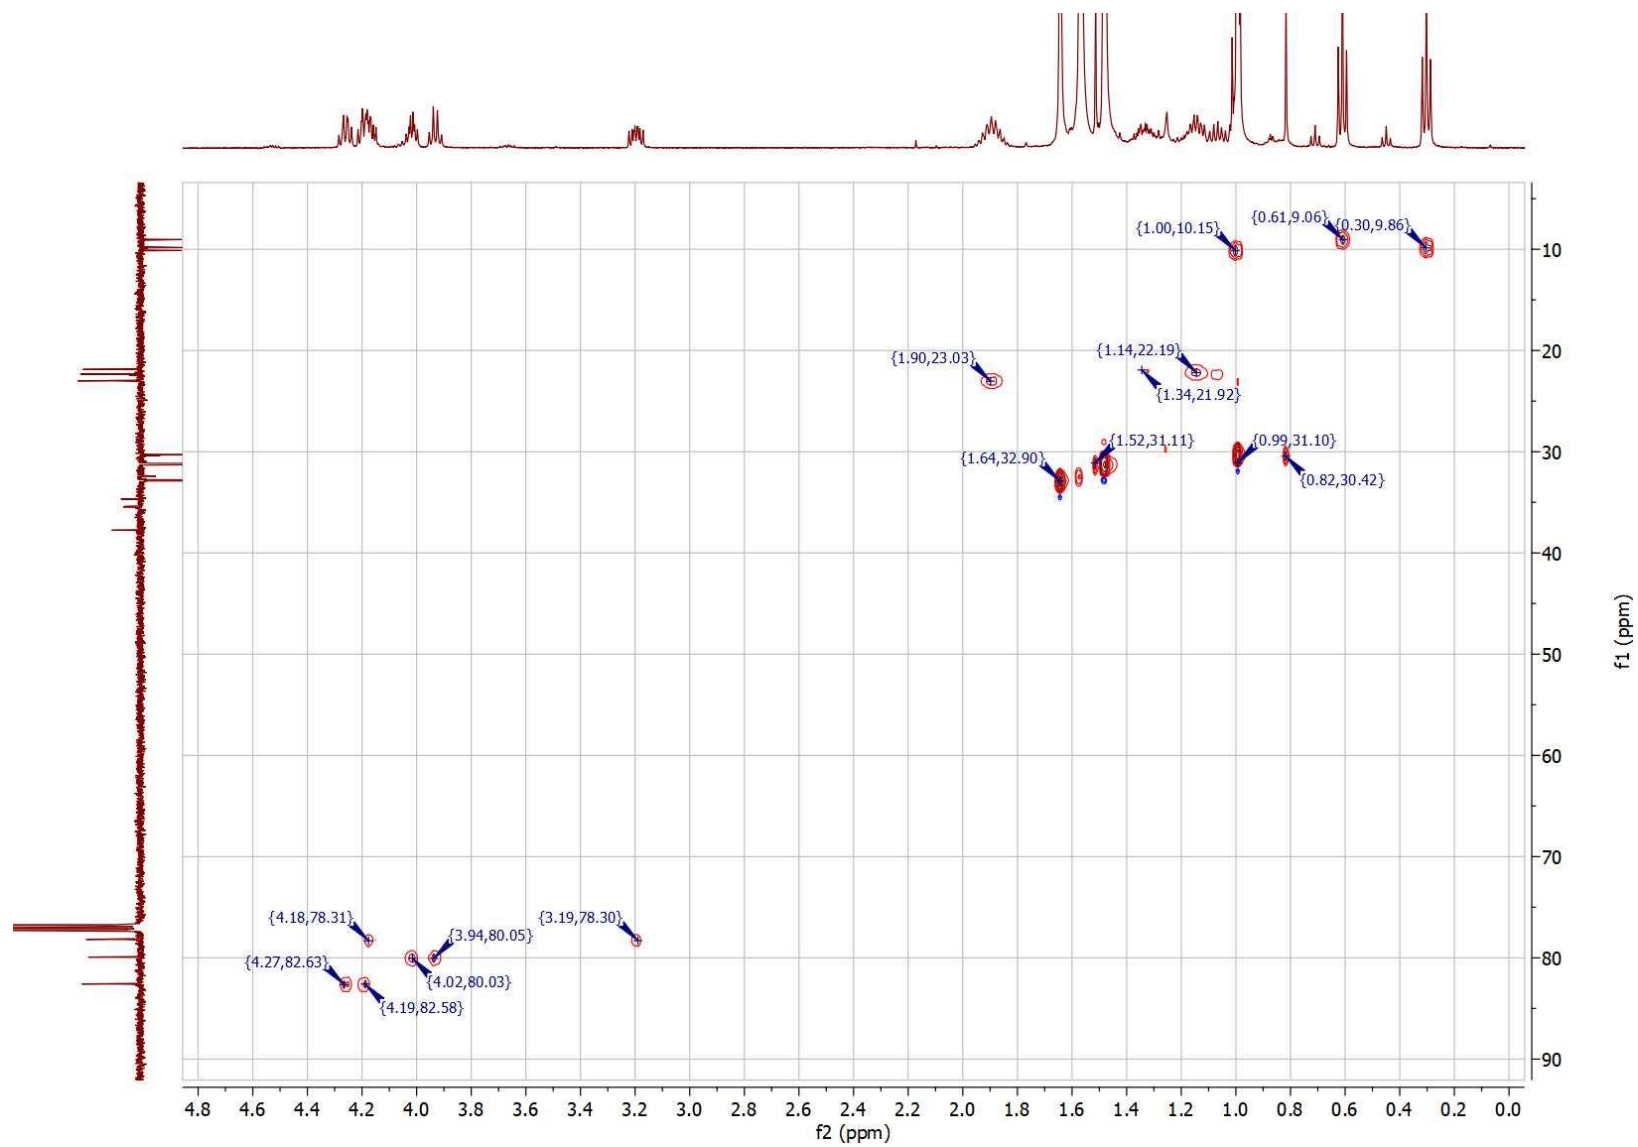

**Figure 16:** HSQC spectrum of compound **10c** – aliphatic region

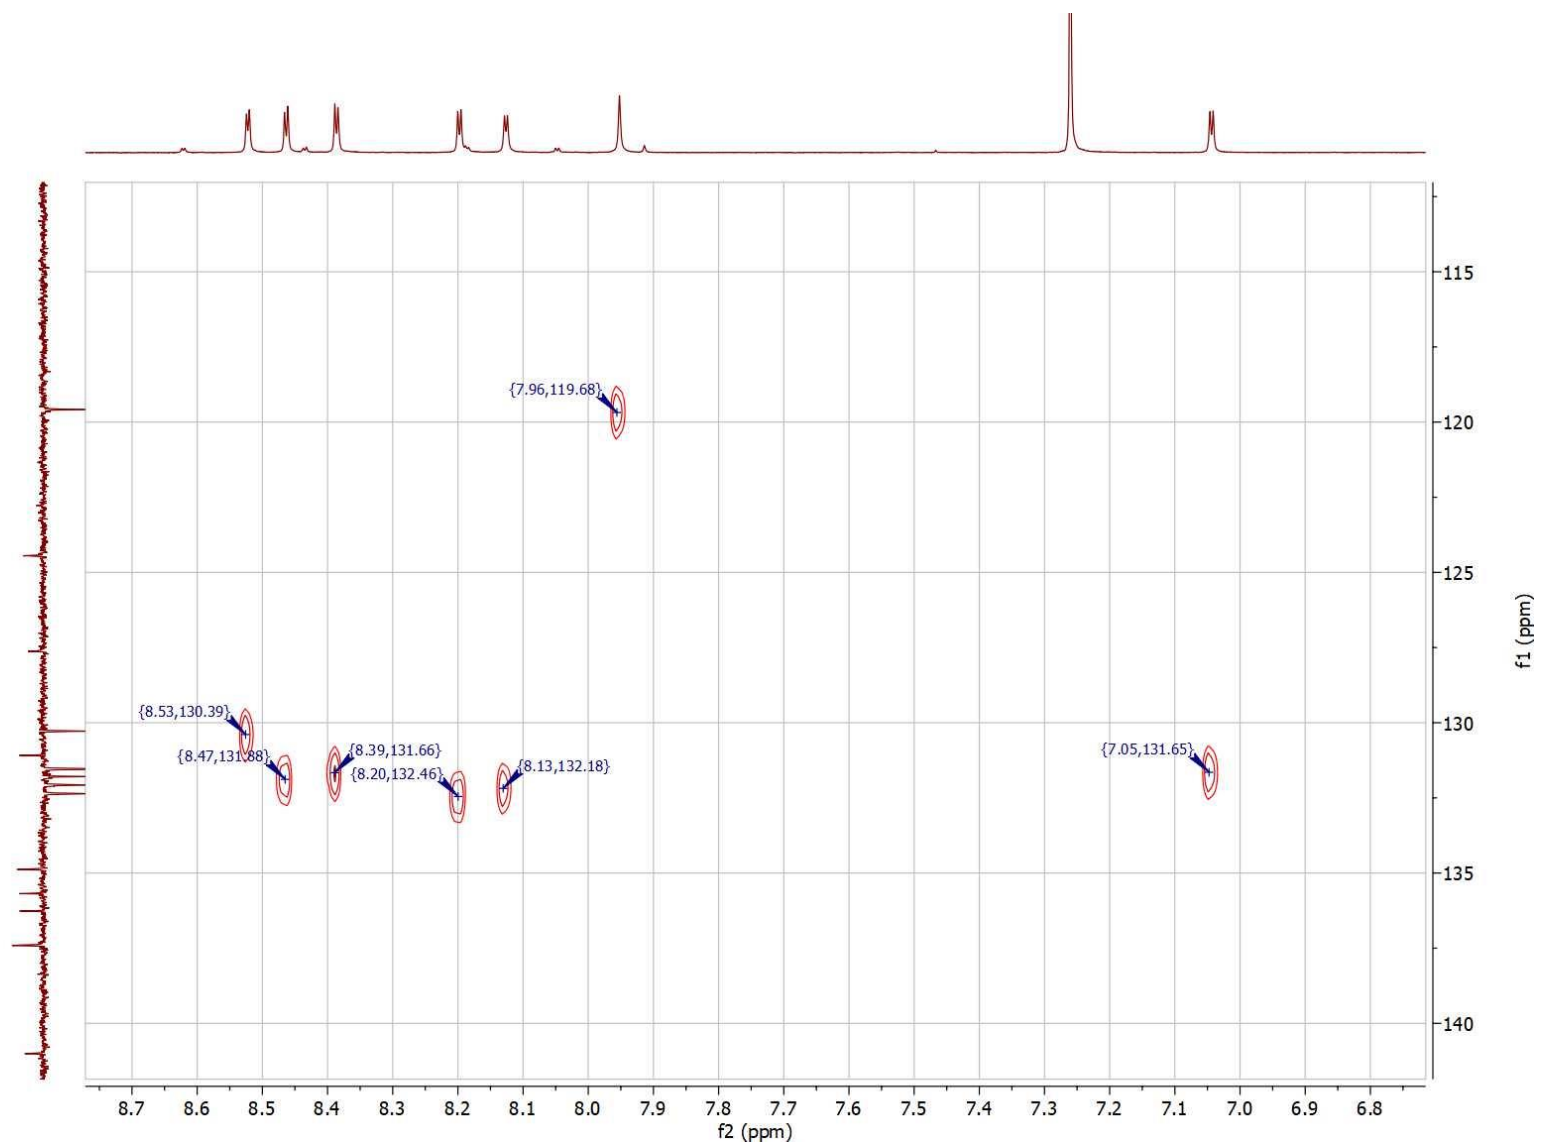

**Figure 17:** HSQC spectrum of compound **10c** – aromatic region



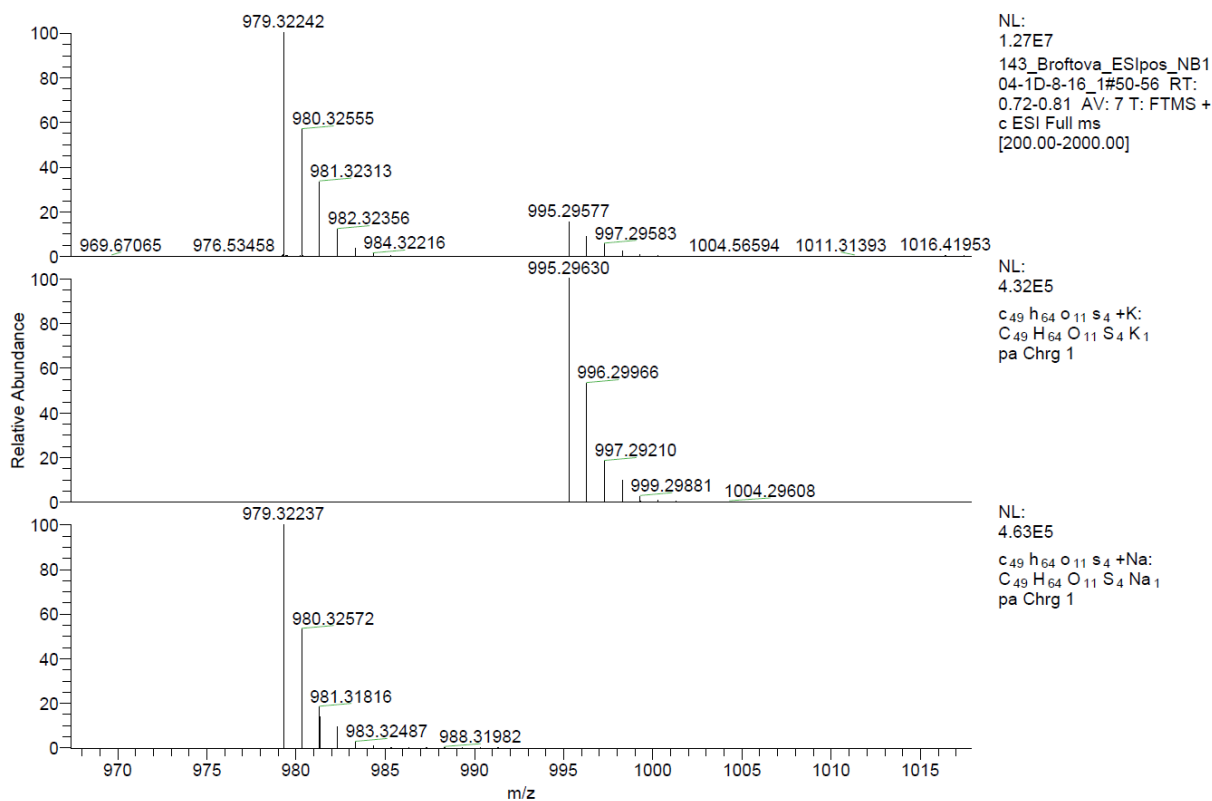

Figure 18: HRMS ESI+ spectrum of compound 10c

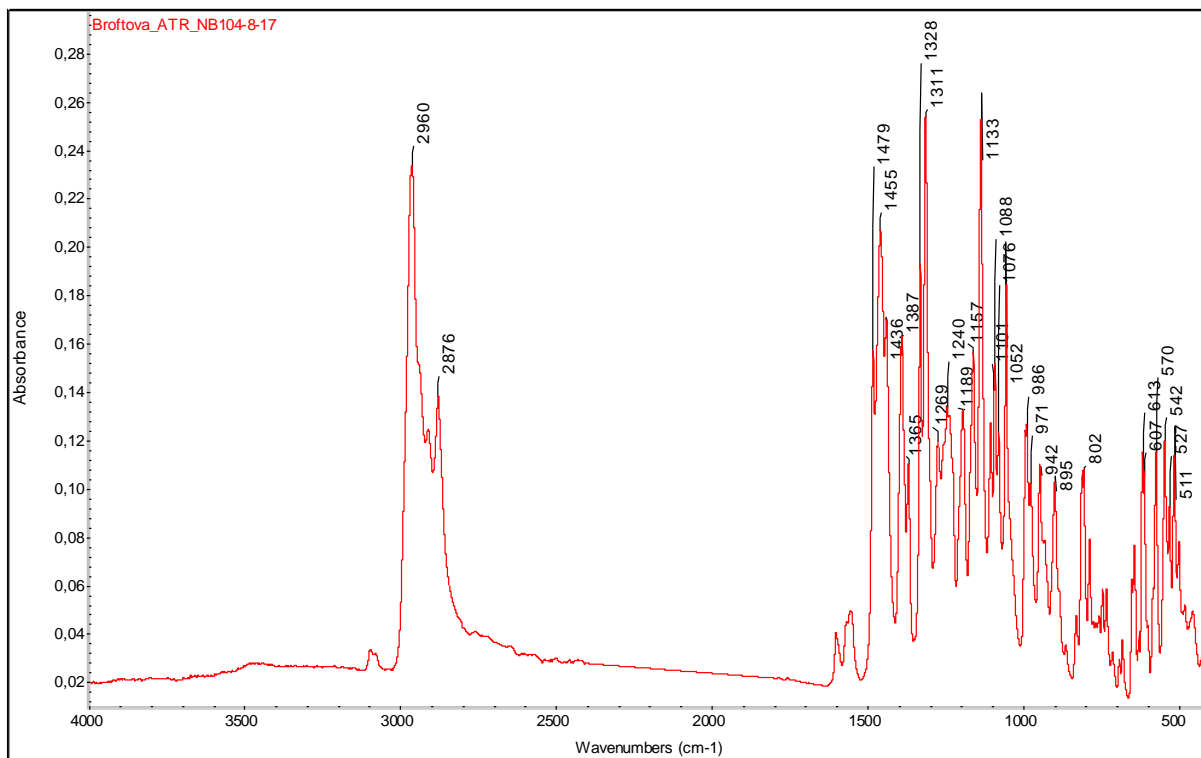

Figure 19: IR spectrum of compound 10

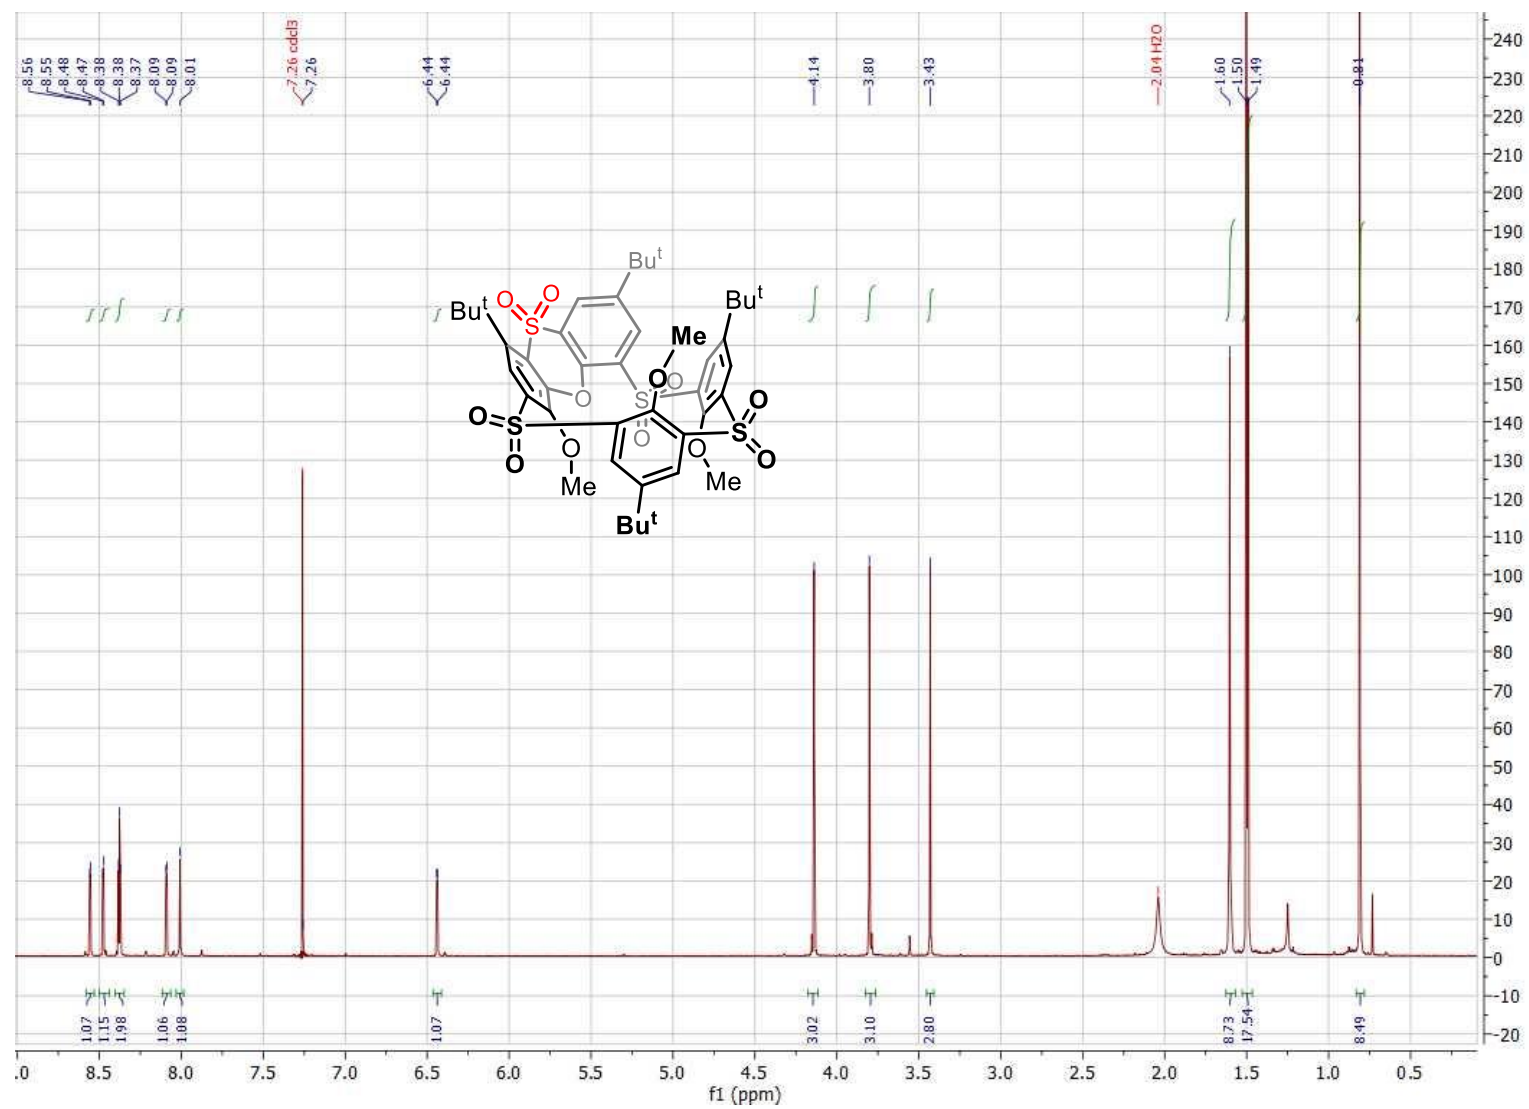

**Figure 20:** <sup>1</sup>H NMR (500 MHz, CDCl<sub>3</sub>, 298 K) spectrum of compound **11a**

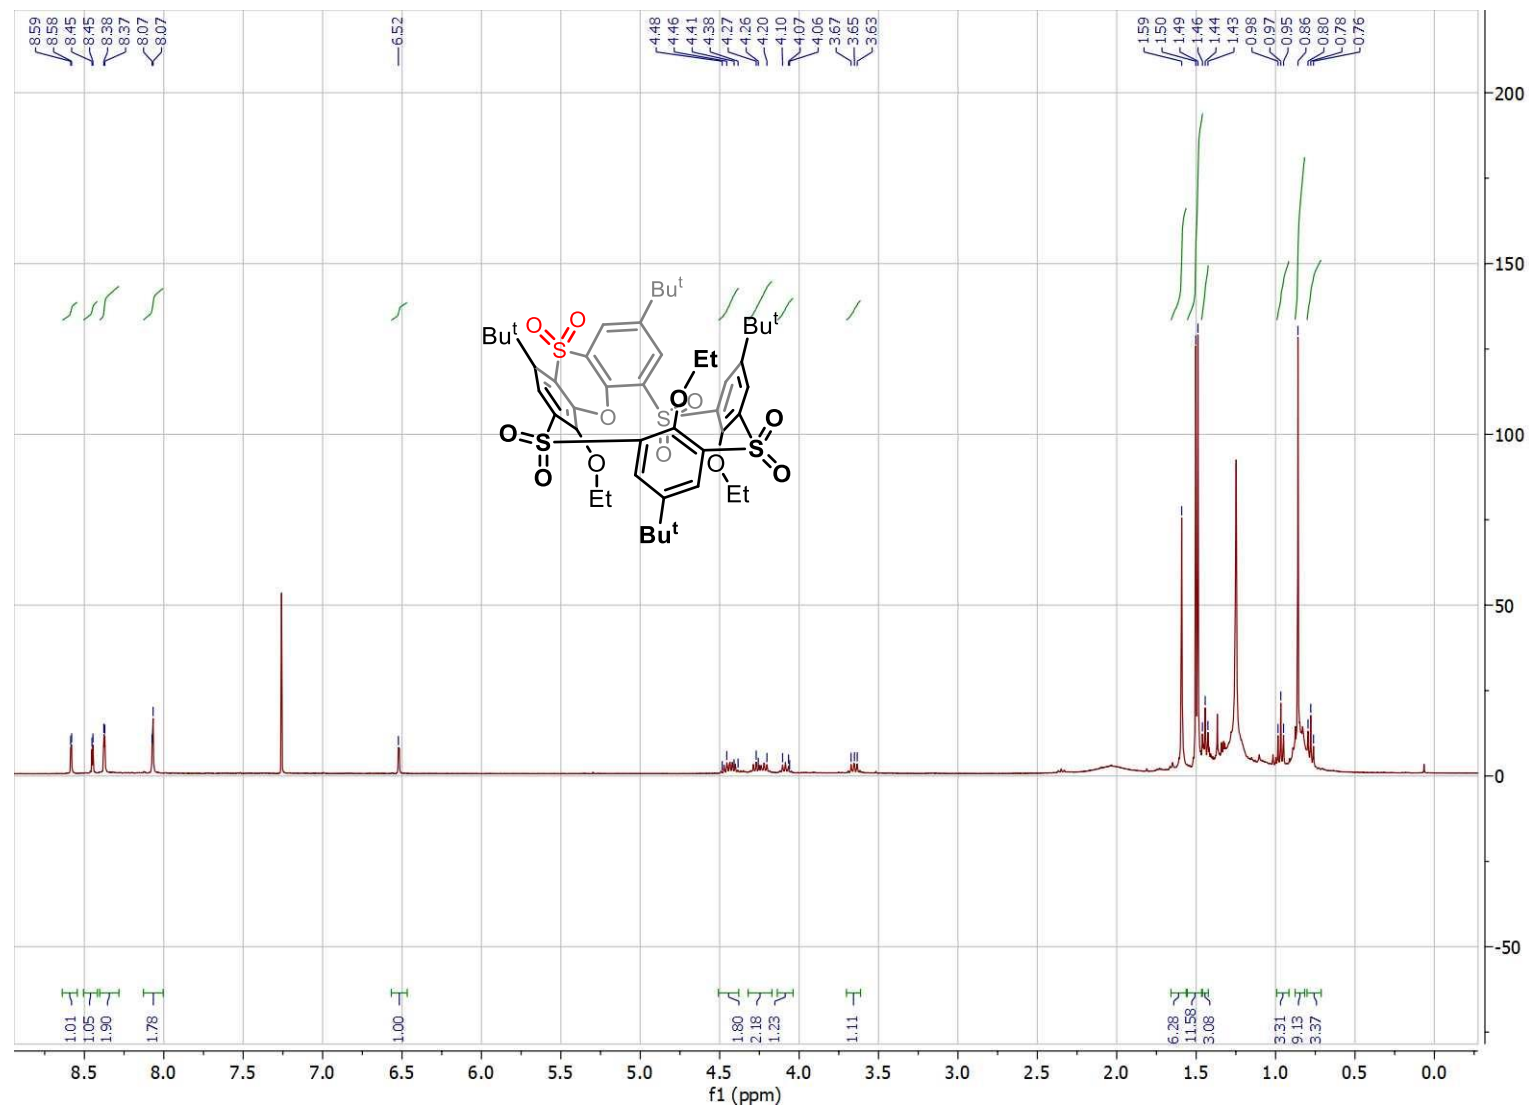

**Figure 21:** <sup>1</sup>H NMR (400 MHz, CDCl<sub>3</sub>, 298 K) spectrum of compound **11b**

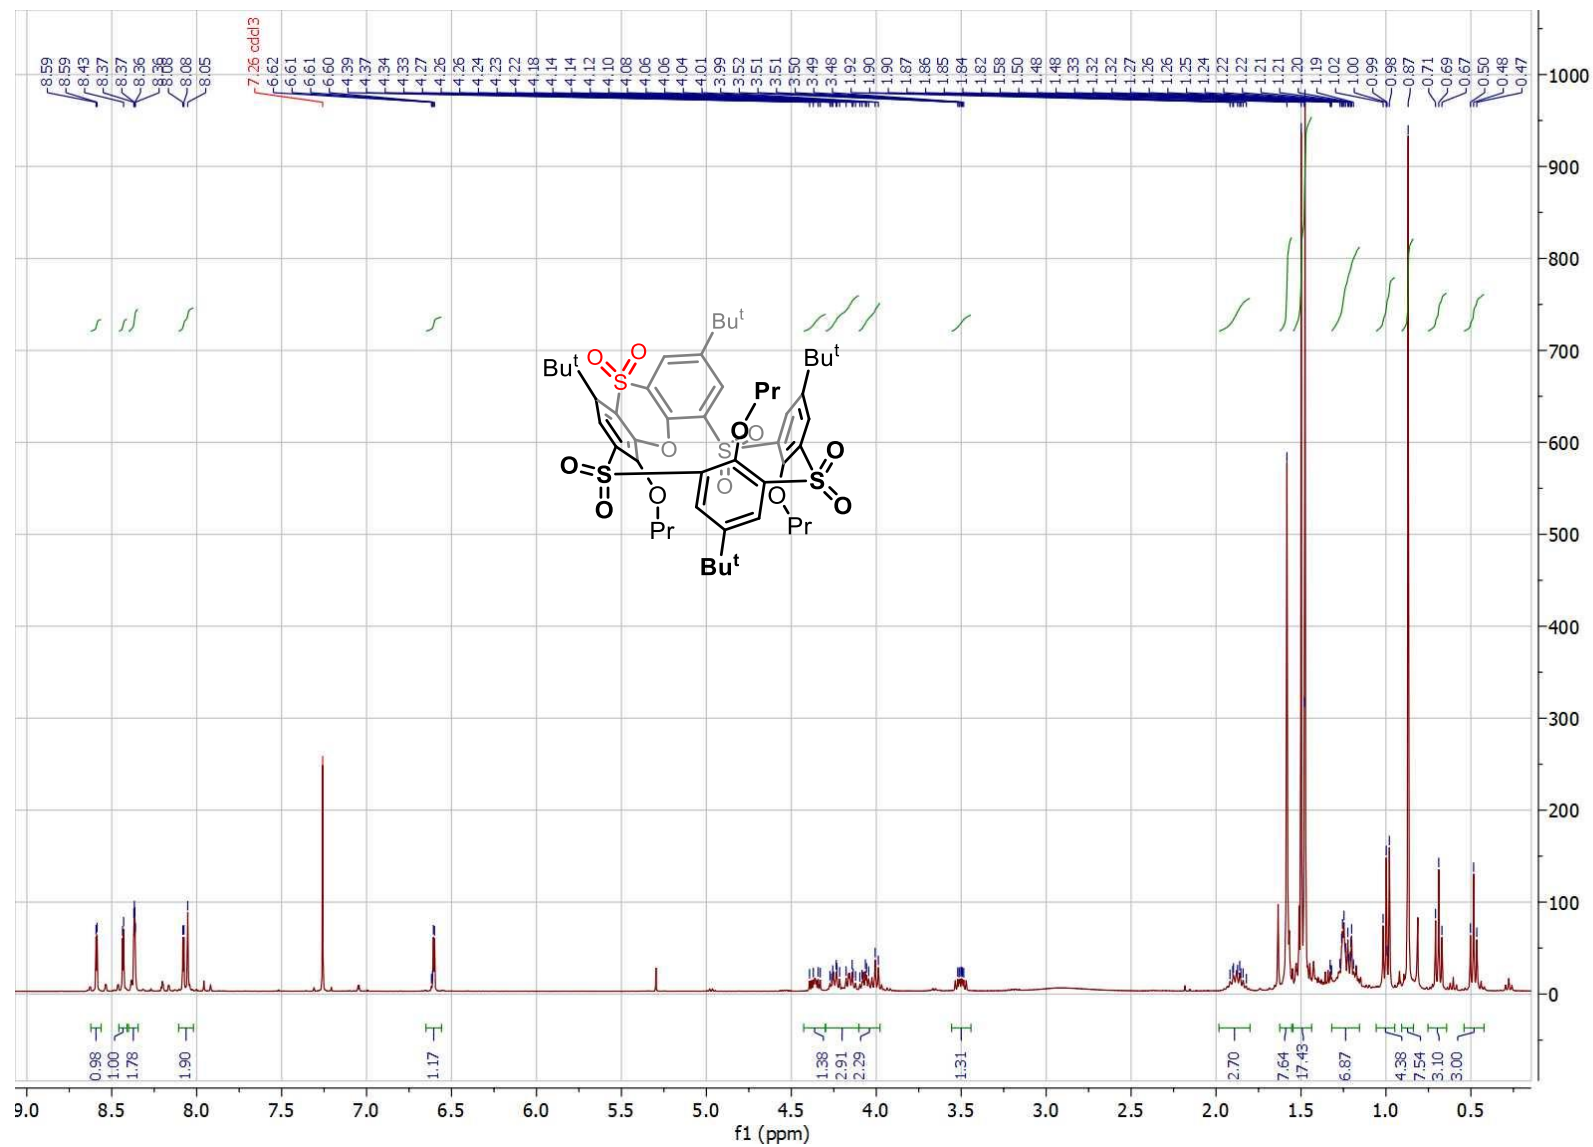

**Figure 22:** <sup>1</sup>H NMR (400 MHz, CDCl<sub>3</sub>, 298 K) spectrum of compound **11c**

roftova\_nb\_6b, !H, CD2Cl2

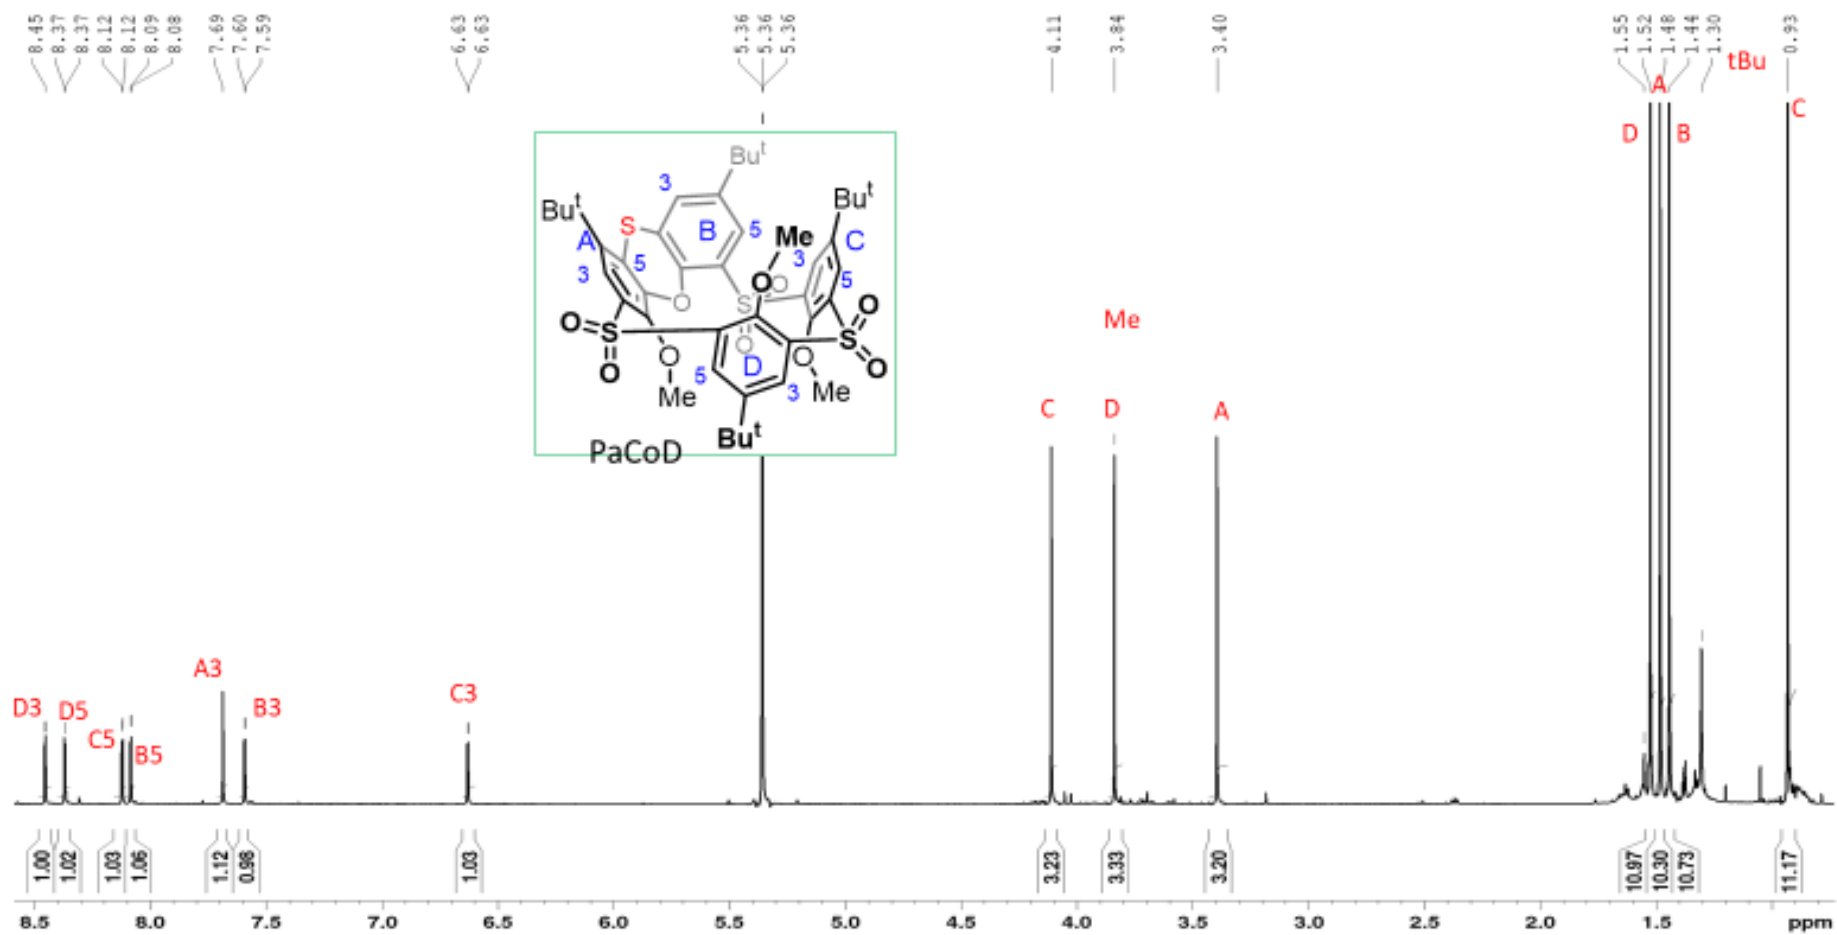

Figure 23:  $^1\text{H}$  NMR (600 MHz,  $\text{CD}_2\text{Cl}_2$ , 298 K) spectrum of compound **12a**

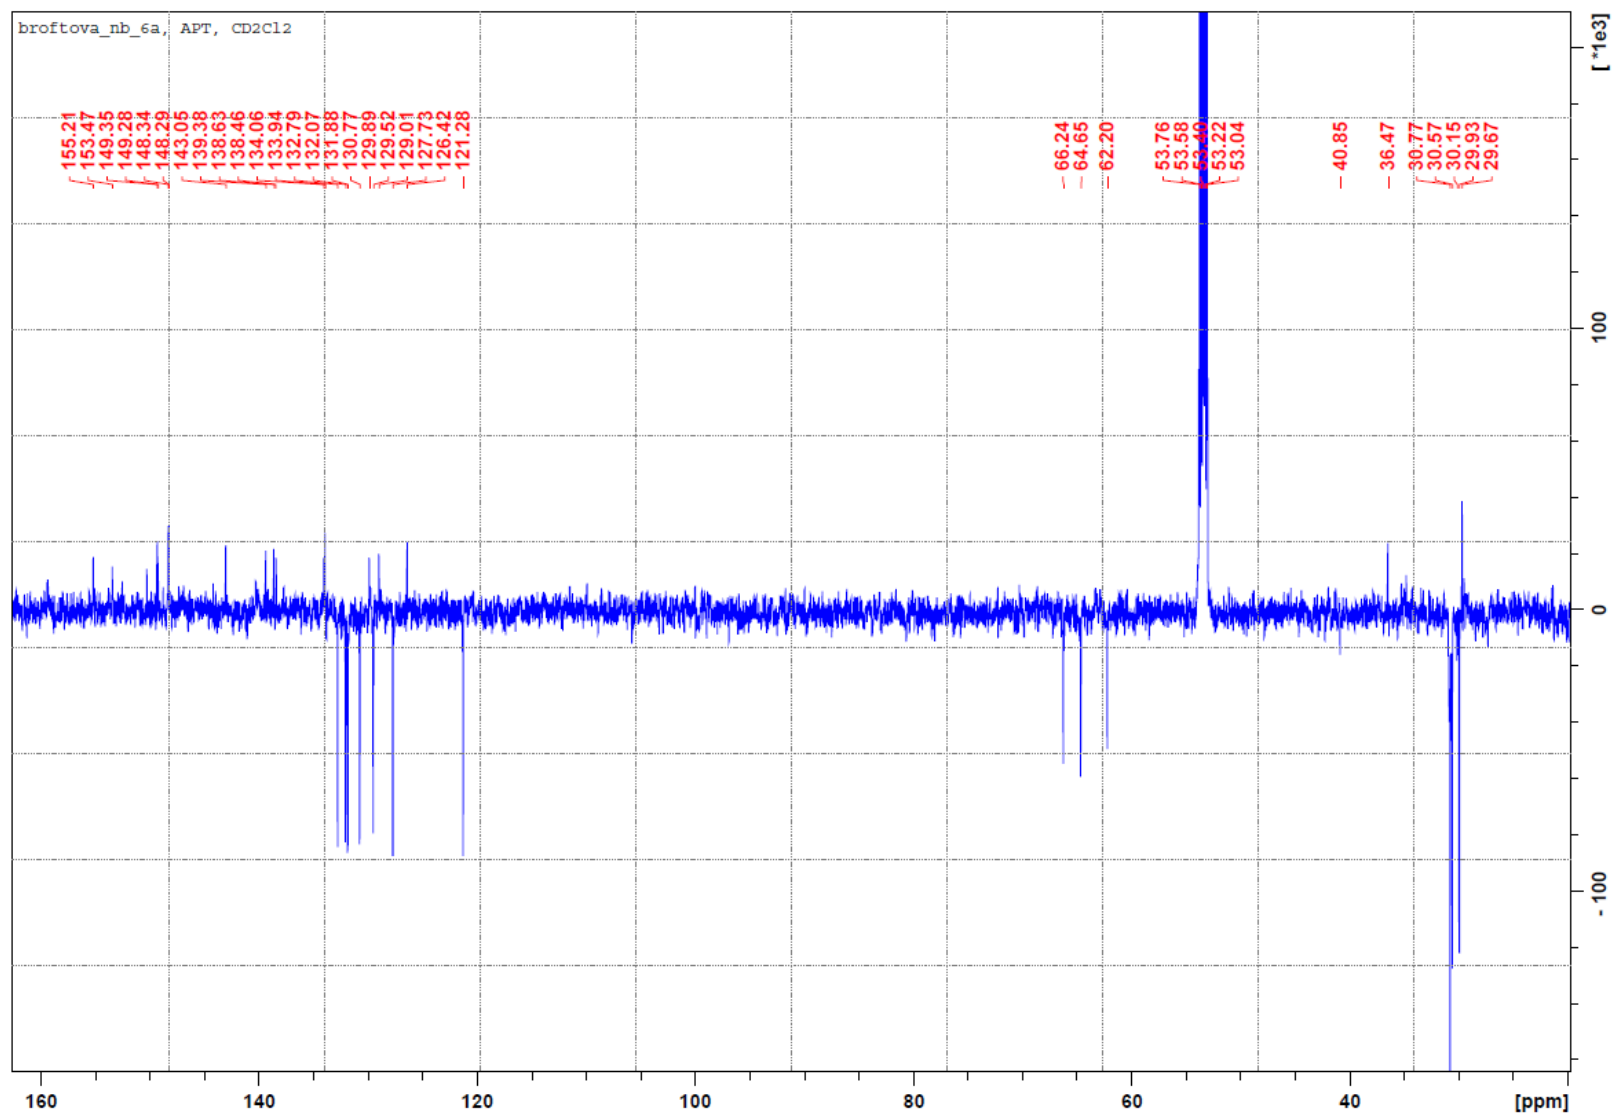

**Figure 24:**  $^{13}\text{C}$  NMR (APT, 150 MHz,  $\text{CD}_2\text{Cl}_2$ , 298 K) spectrum of compound **12a**

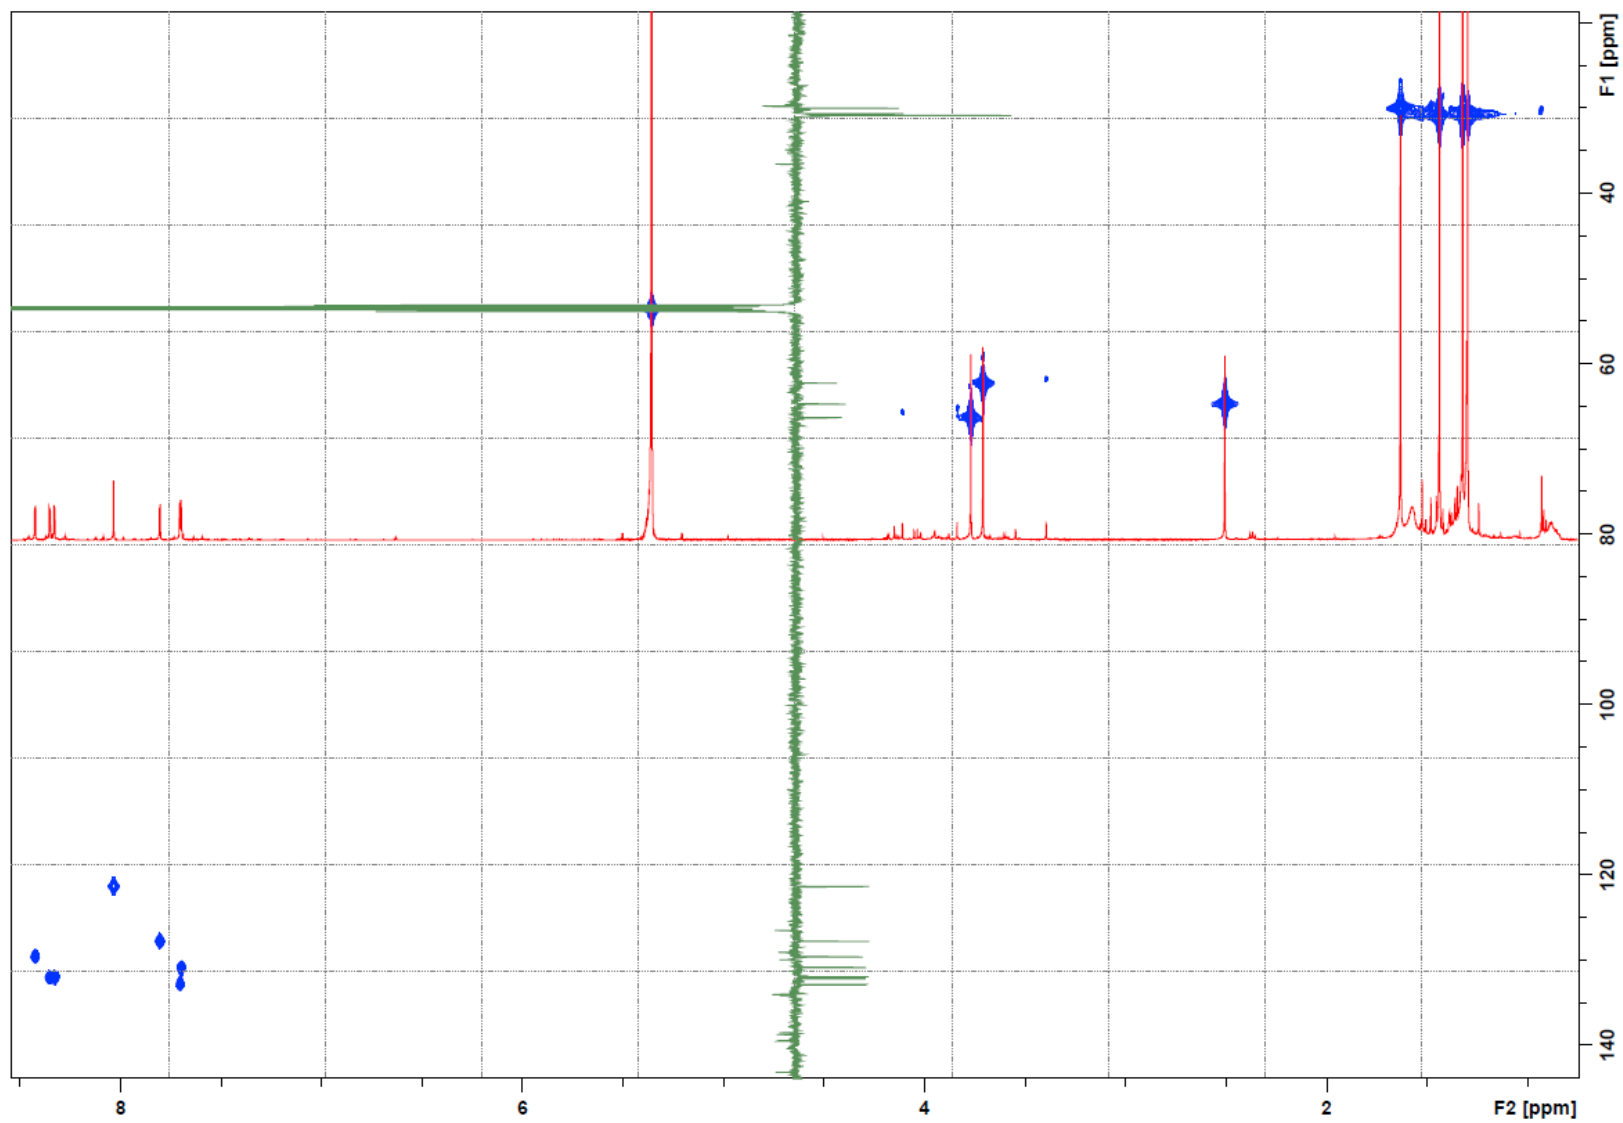

**Figure 25:** HMQC spectrum of compound 12a

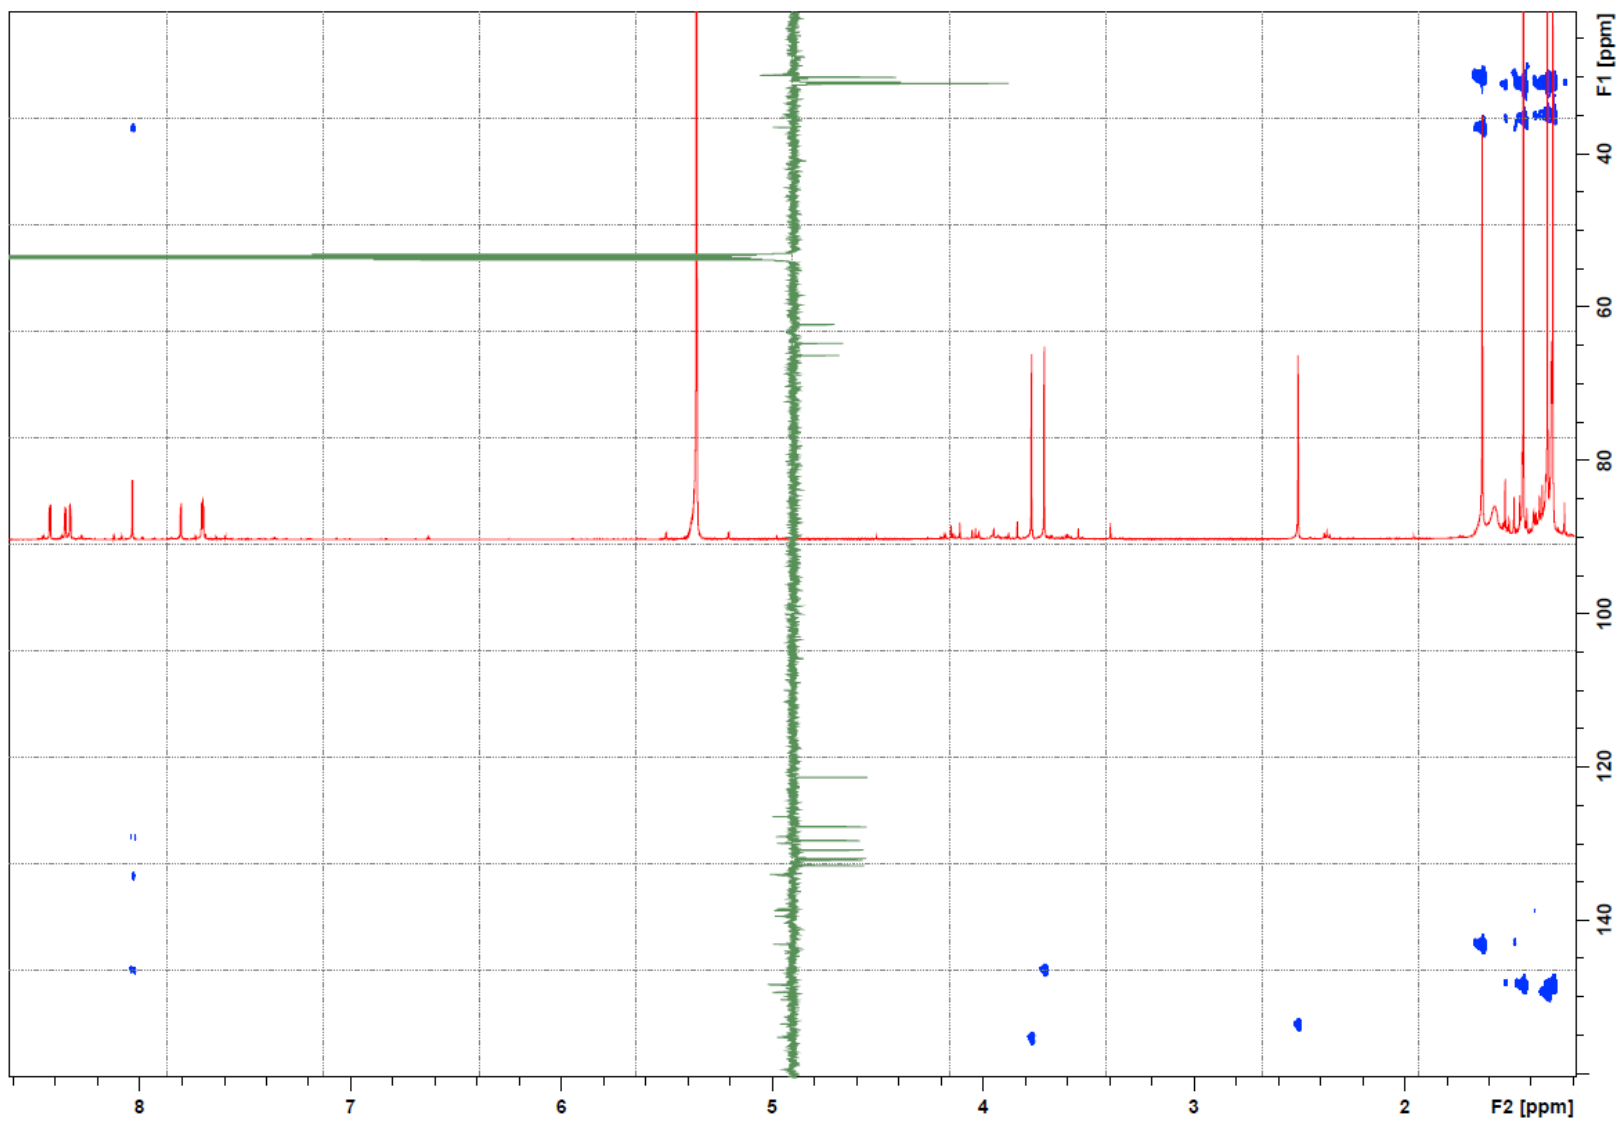

**Figure 26:** HMBC spectrum of compound 12a



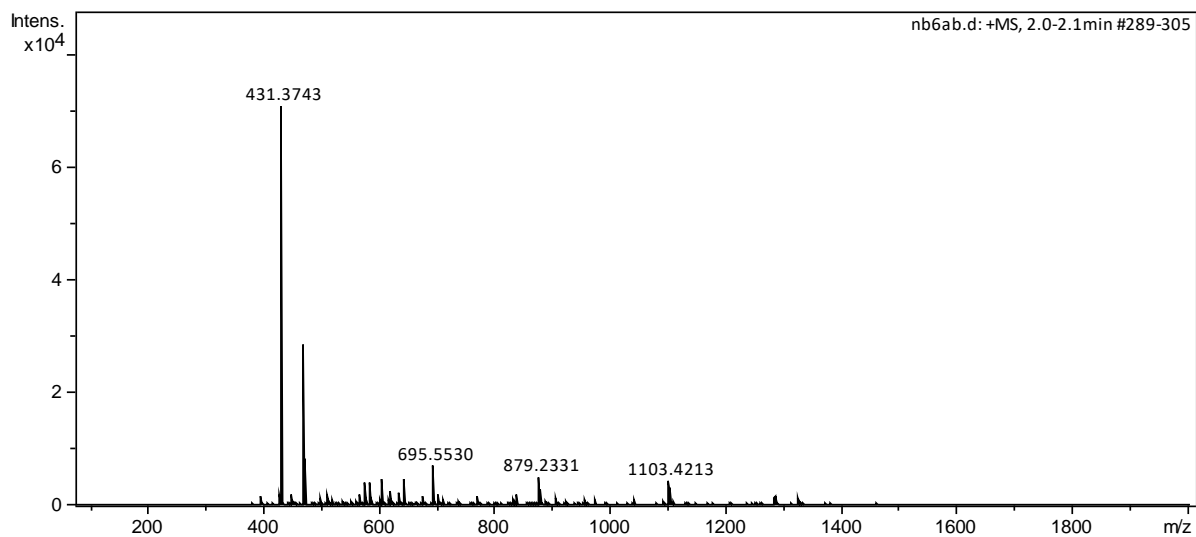

**Figure 27:** HRMS ESI+ spectrum of compound **12a**

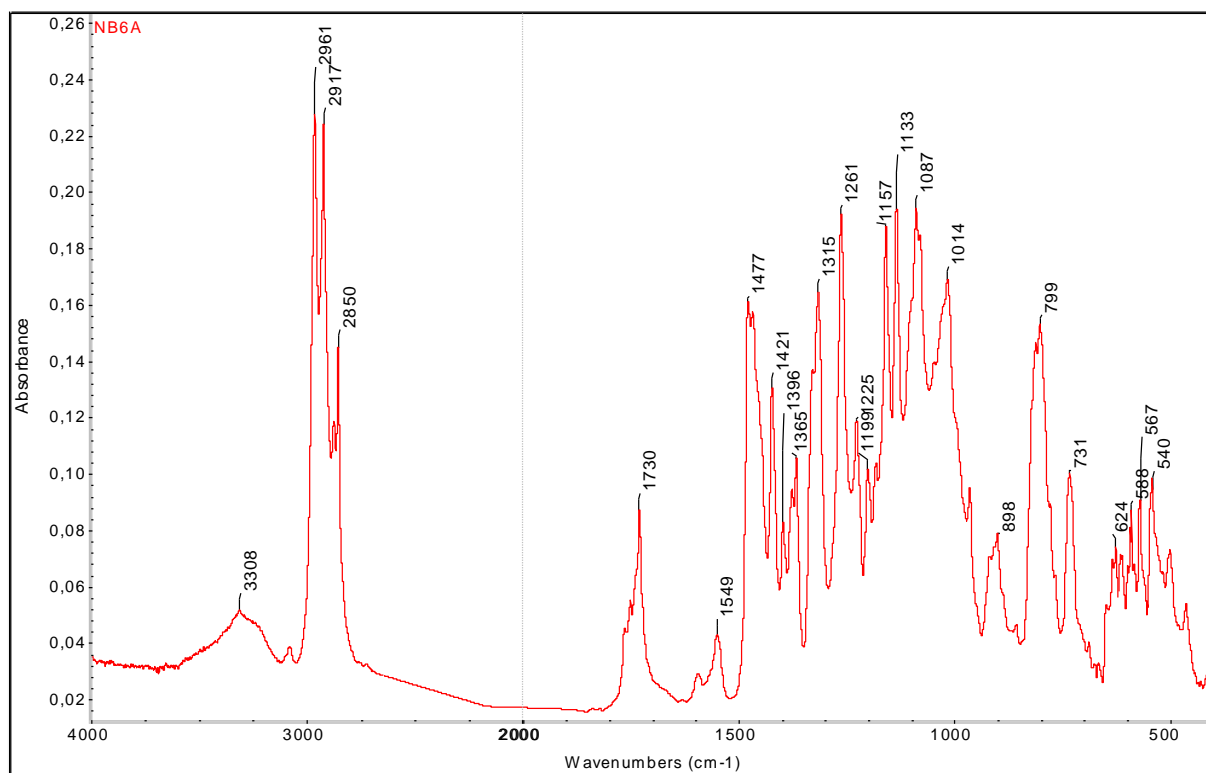

**Figure 28:** IR spectrum of compound **12a**

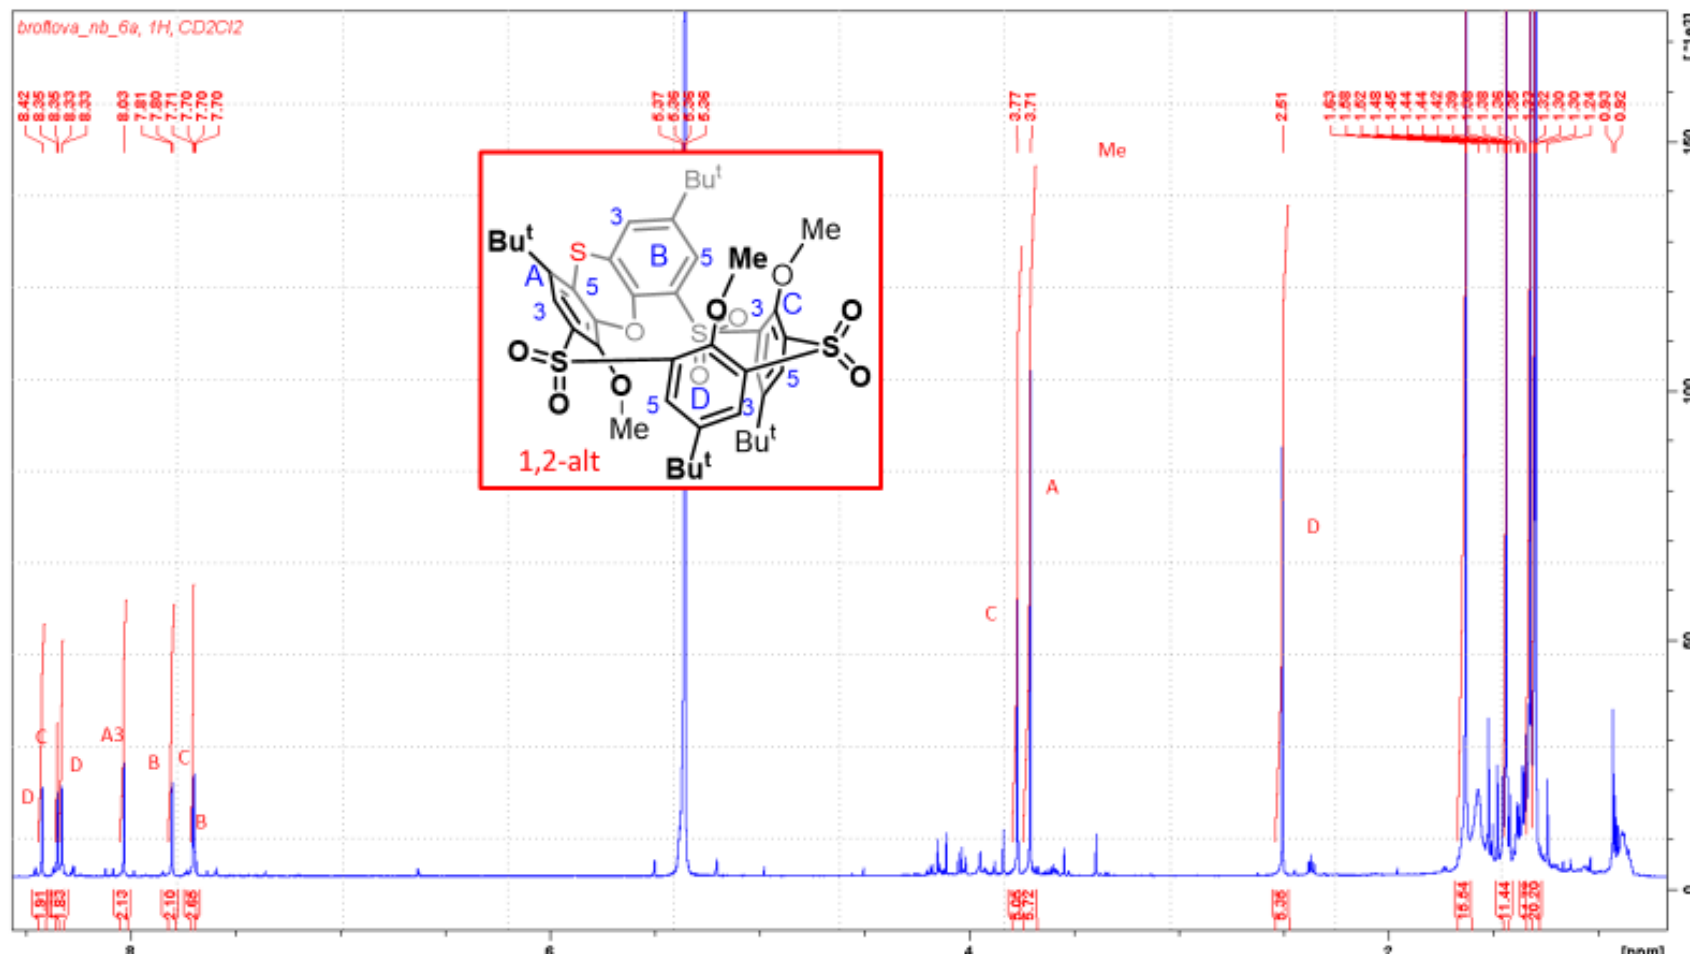

Figure 29:  $^1\text{H}$  NMR (600 MHz,  $\text{CD}_2\text{Cl}_2$ , 298 K) spectrum of compound 12b

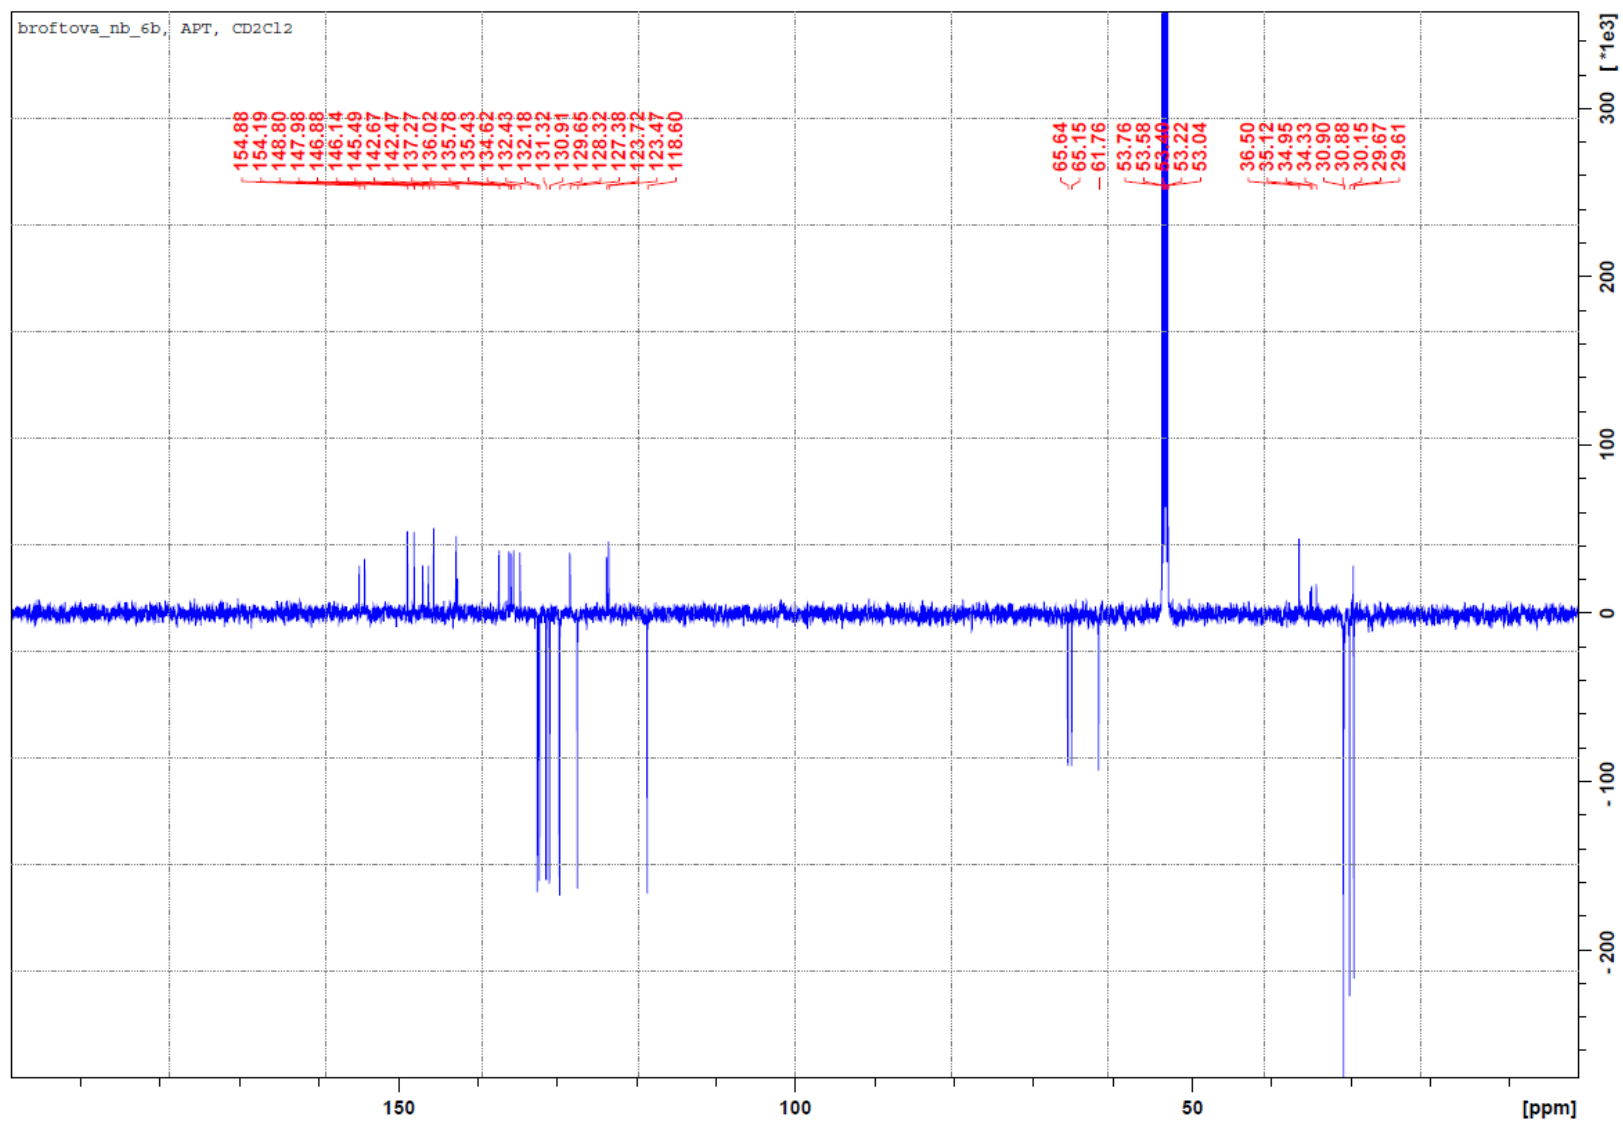

**Figure 30:** <sup>13</sup>C NMR (APT, 150 MHz, CD<sub>2</sub>Cl<sub>2</sub>, 298 K) spectrum of compound **12b**

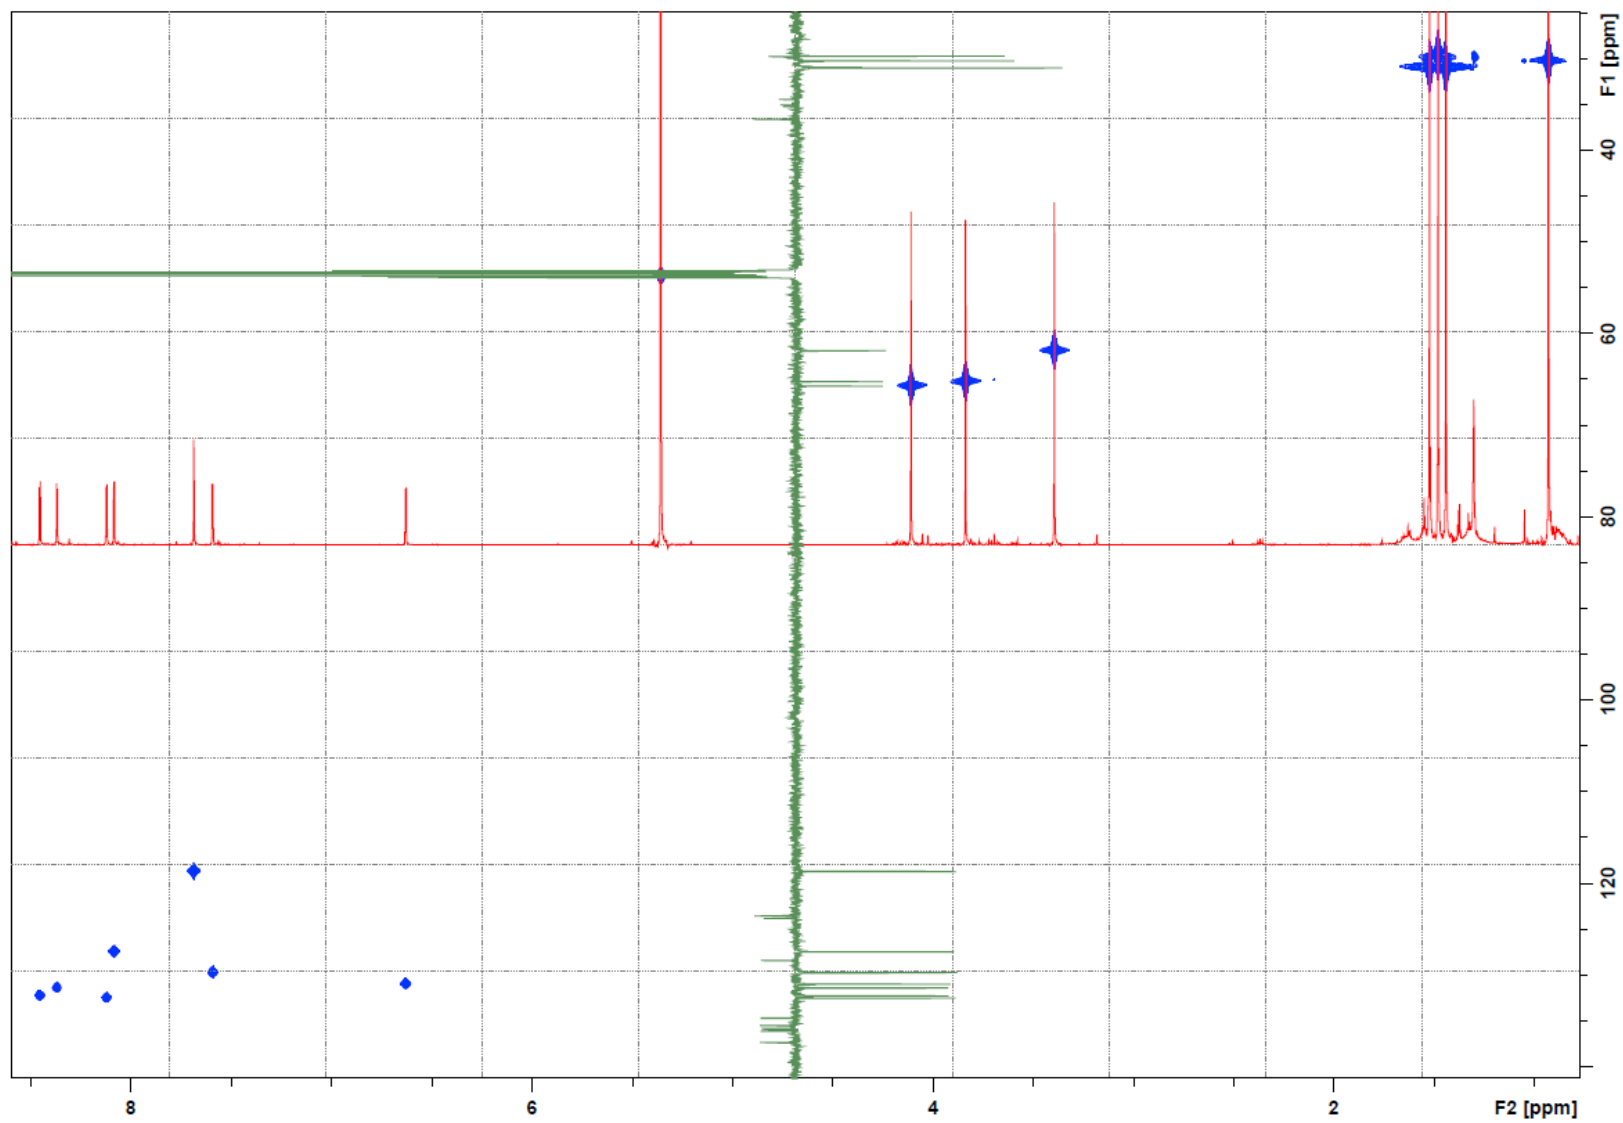

**Figure 31:** HMQC spectrum of compound **12a**

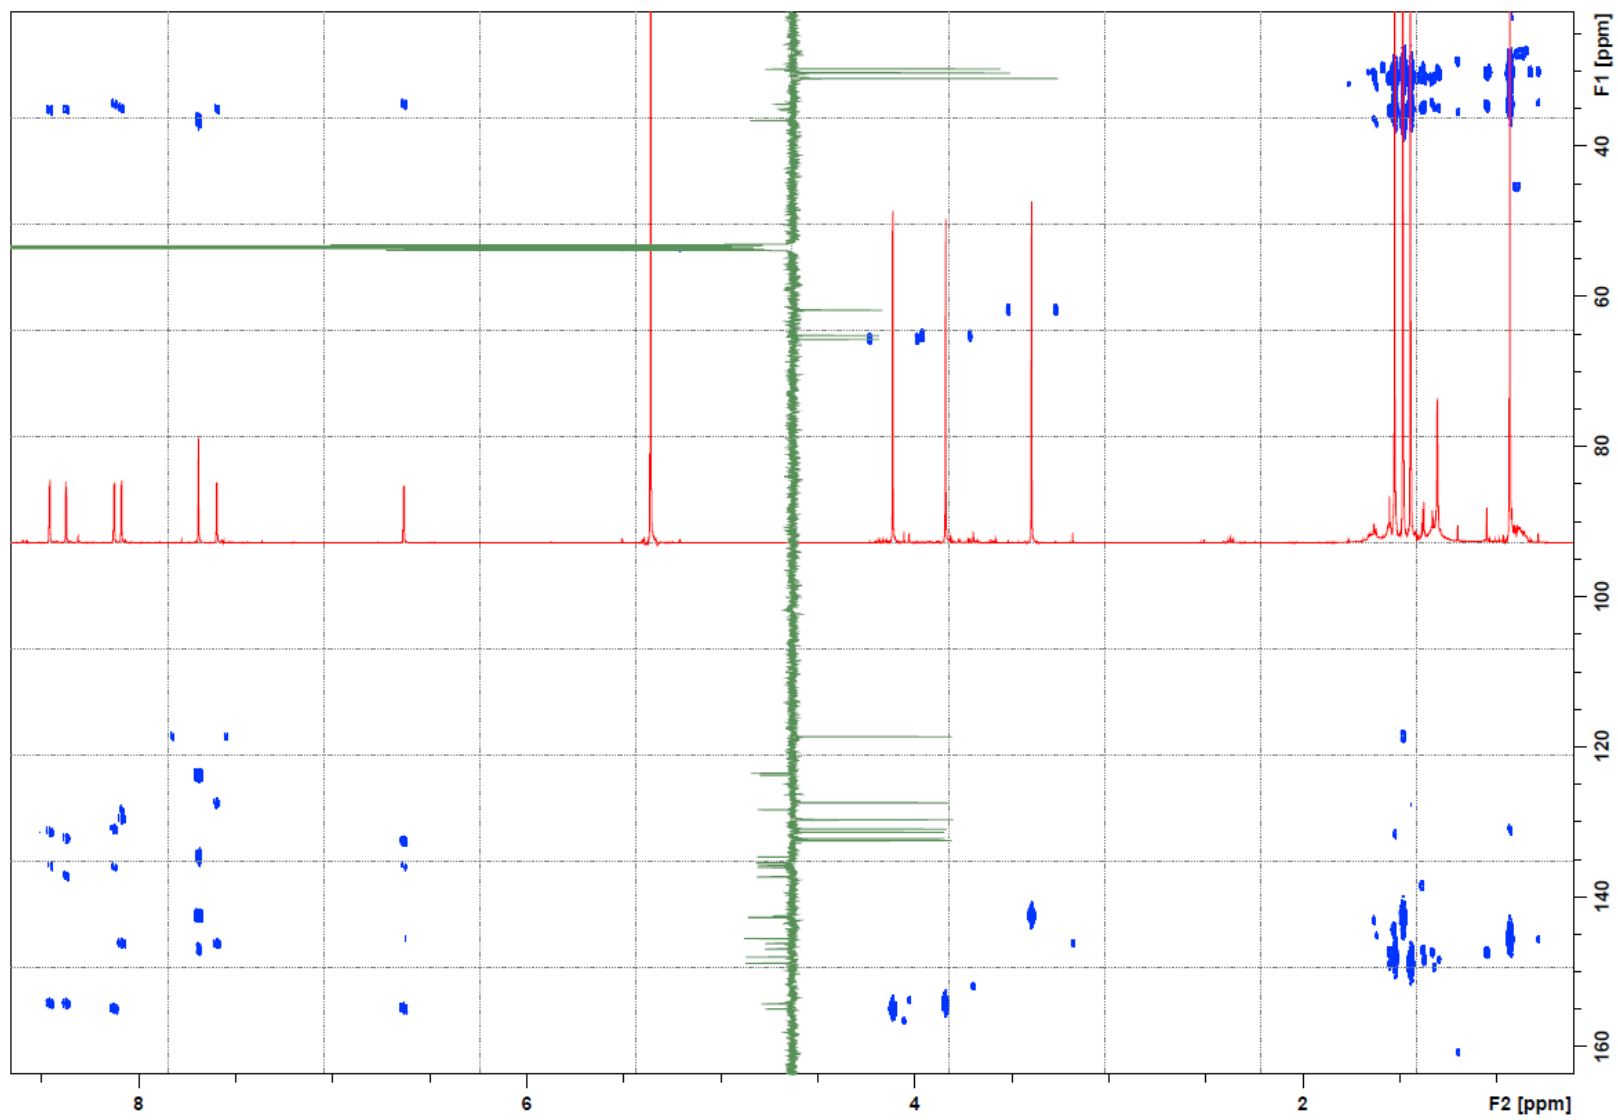

**Figure 32:** HMBC spectrum of compound **12a**

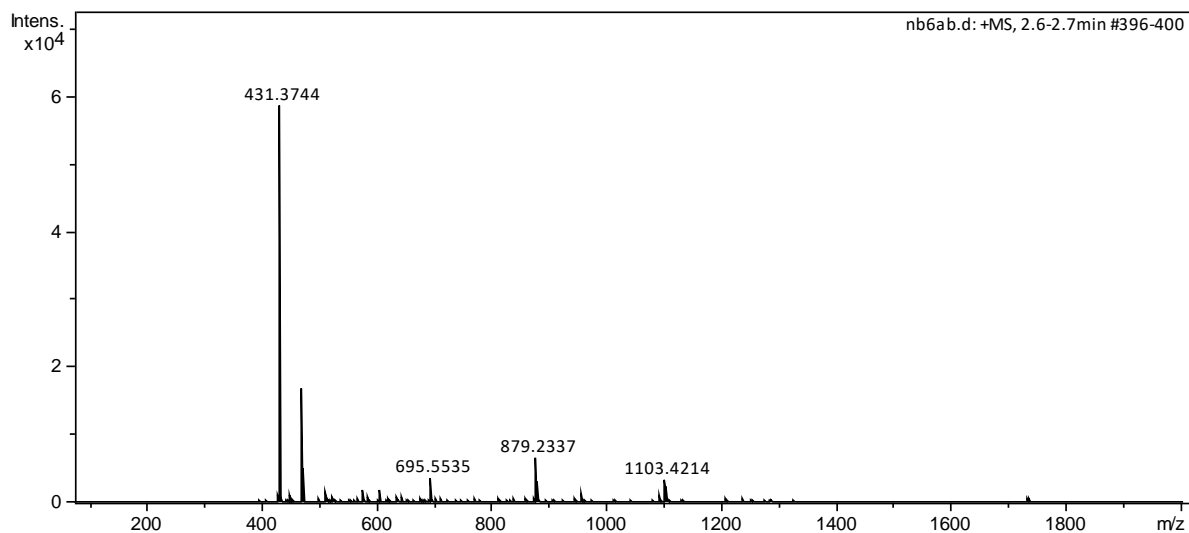

**Figure 33:** HRMS ESI+ spectrum of compound **12b**

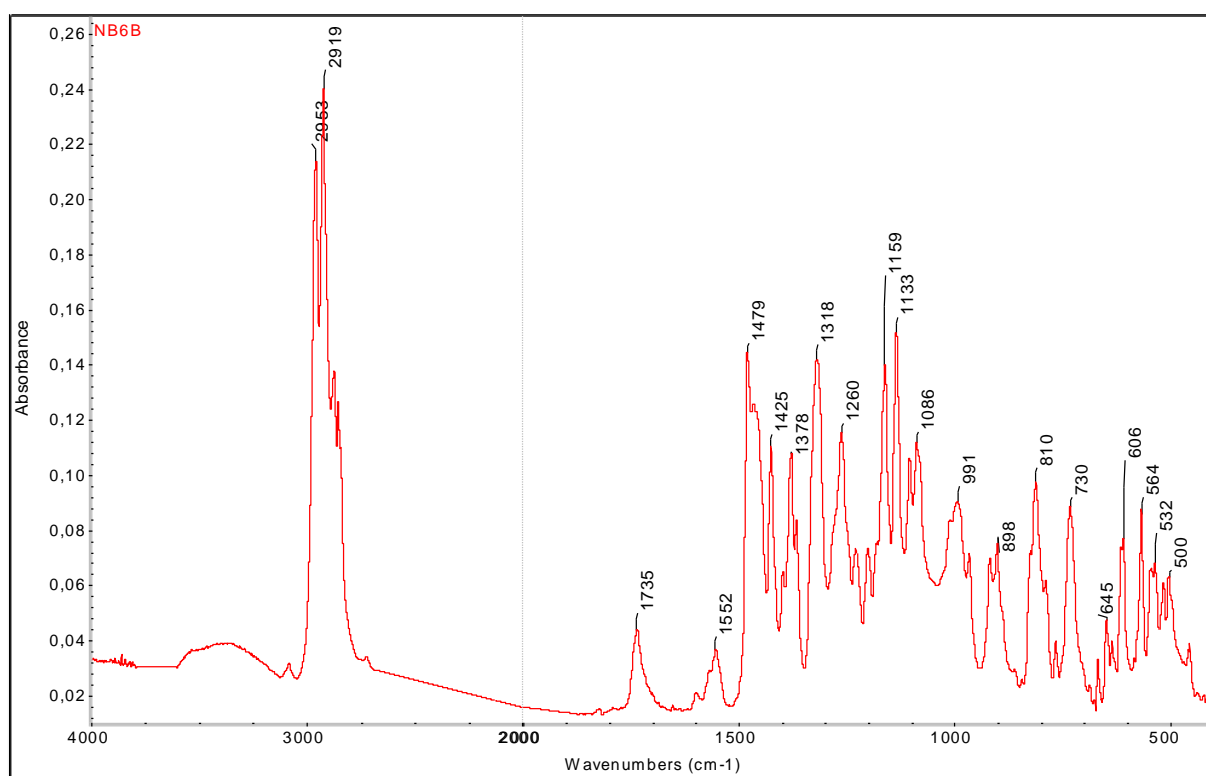

**Figure 34:** IR spectrum of compound **12b**

## 2. Variable temperature NMR spectra

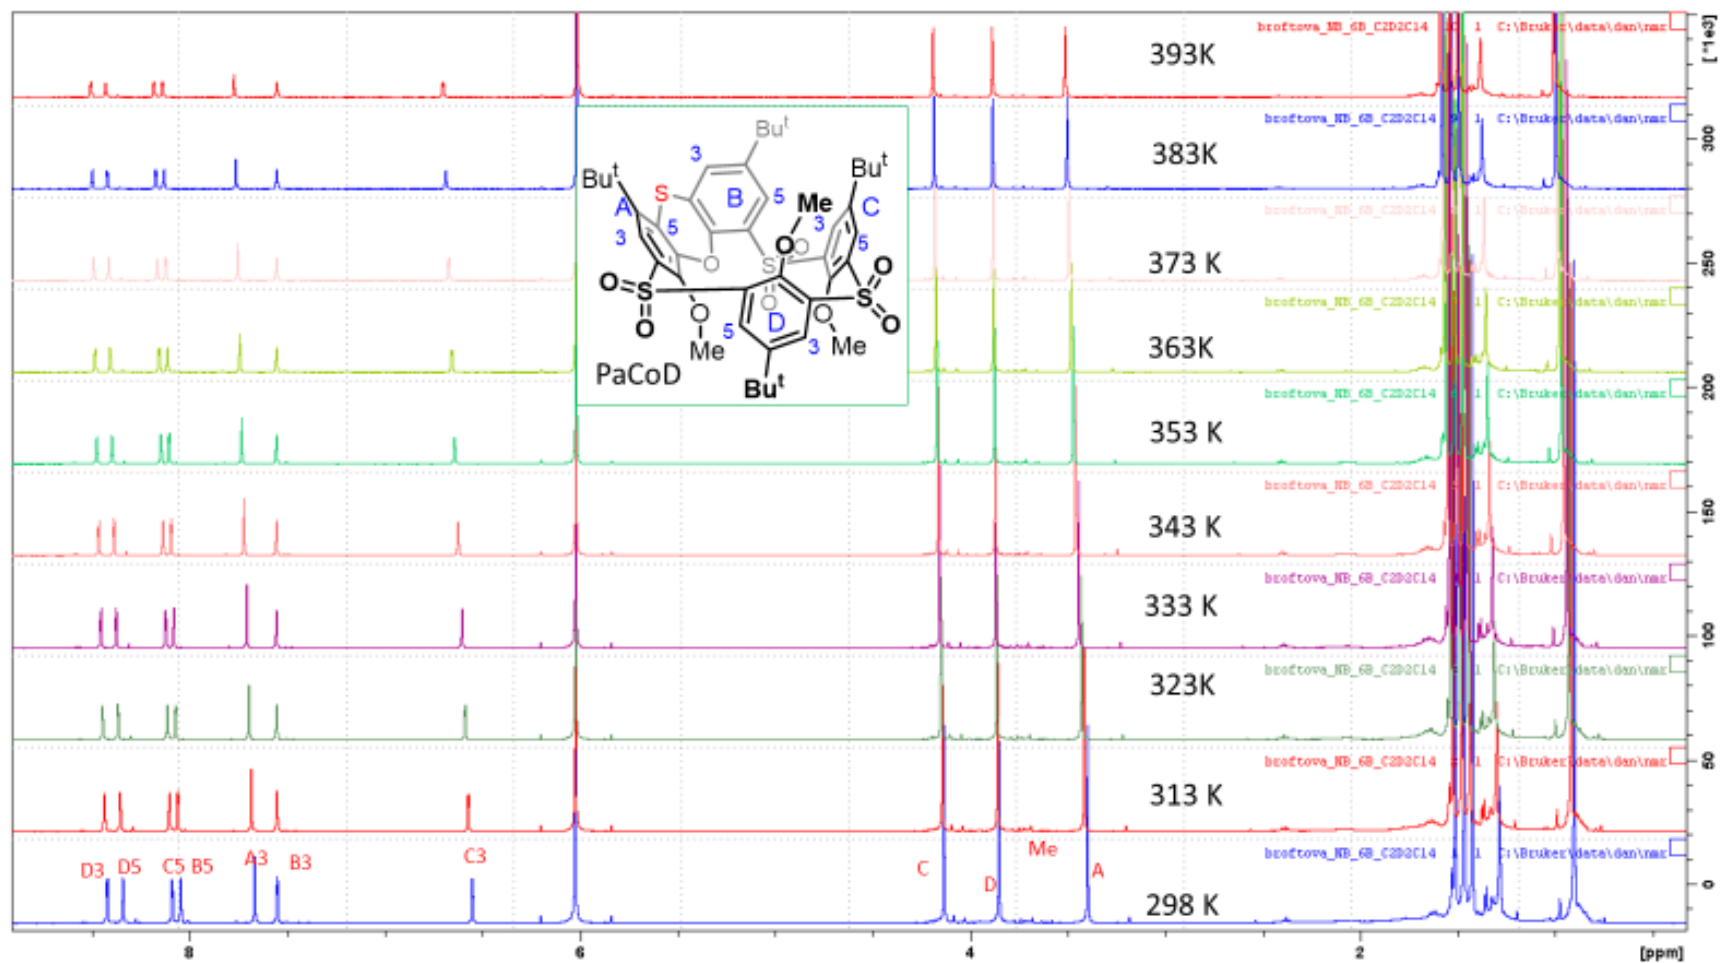

**Figure 35:** VT NMR spectrum (heating) of compound of 12a (600 MHz, CD<sub>2</sub>Cl<sub>2</sub>)

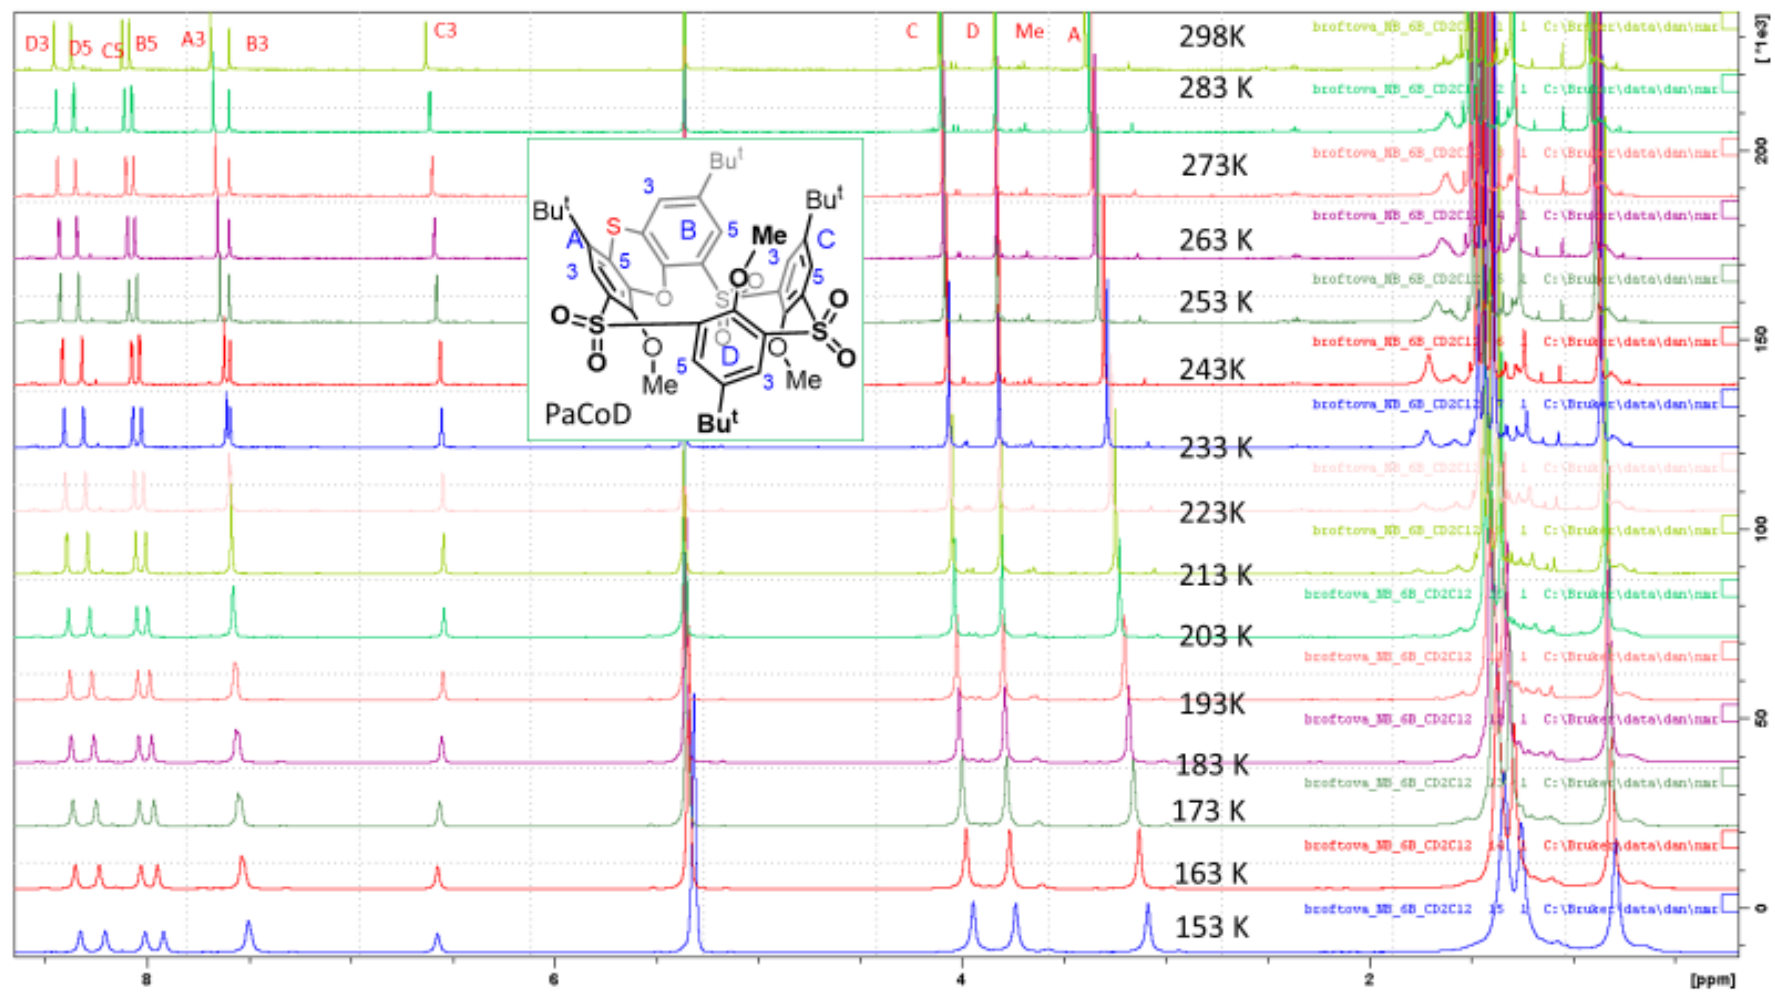

Figure 36: VT NMR spectrum (cooling) of compound 12a (600 MHz, CD<sub>2</sub>Cl<sub>2</sub>)



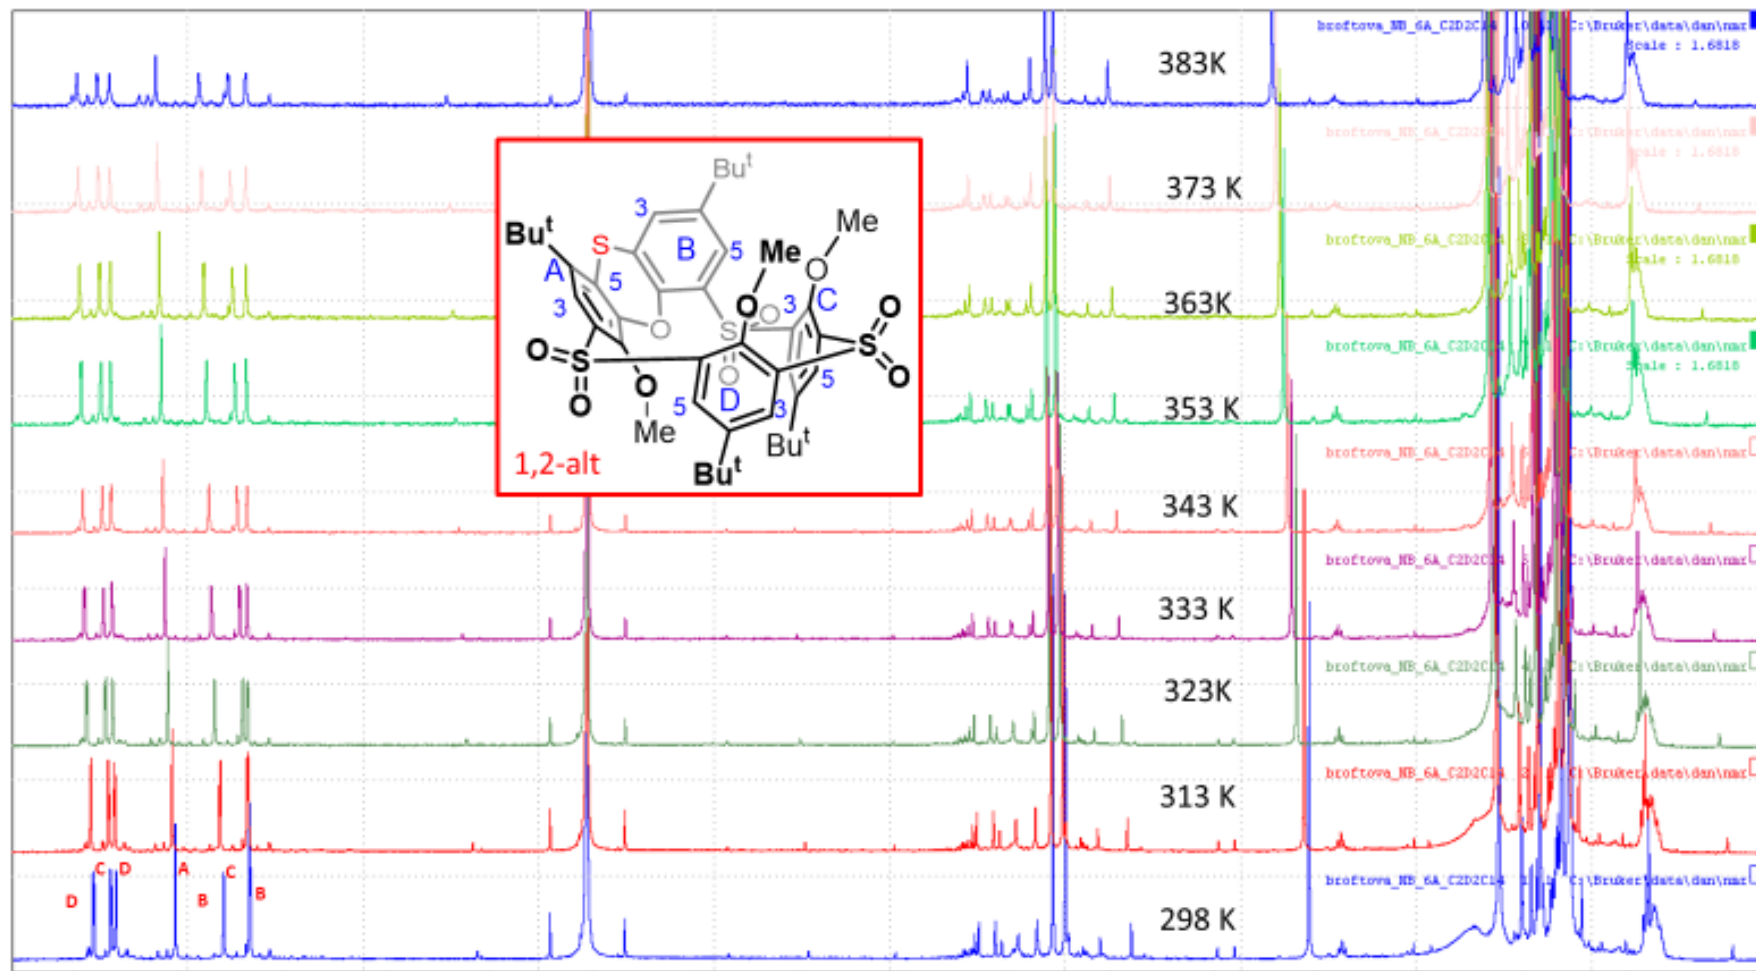

**Figure 37:** VT NMR spectrum (heating) of compound **12b** (600 MHz, CD<sub>2</sub>Cl<sub>2</sub>)

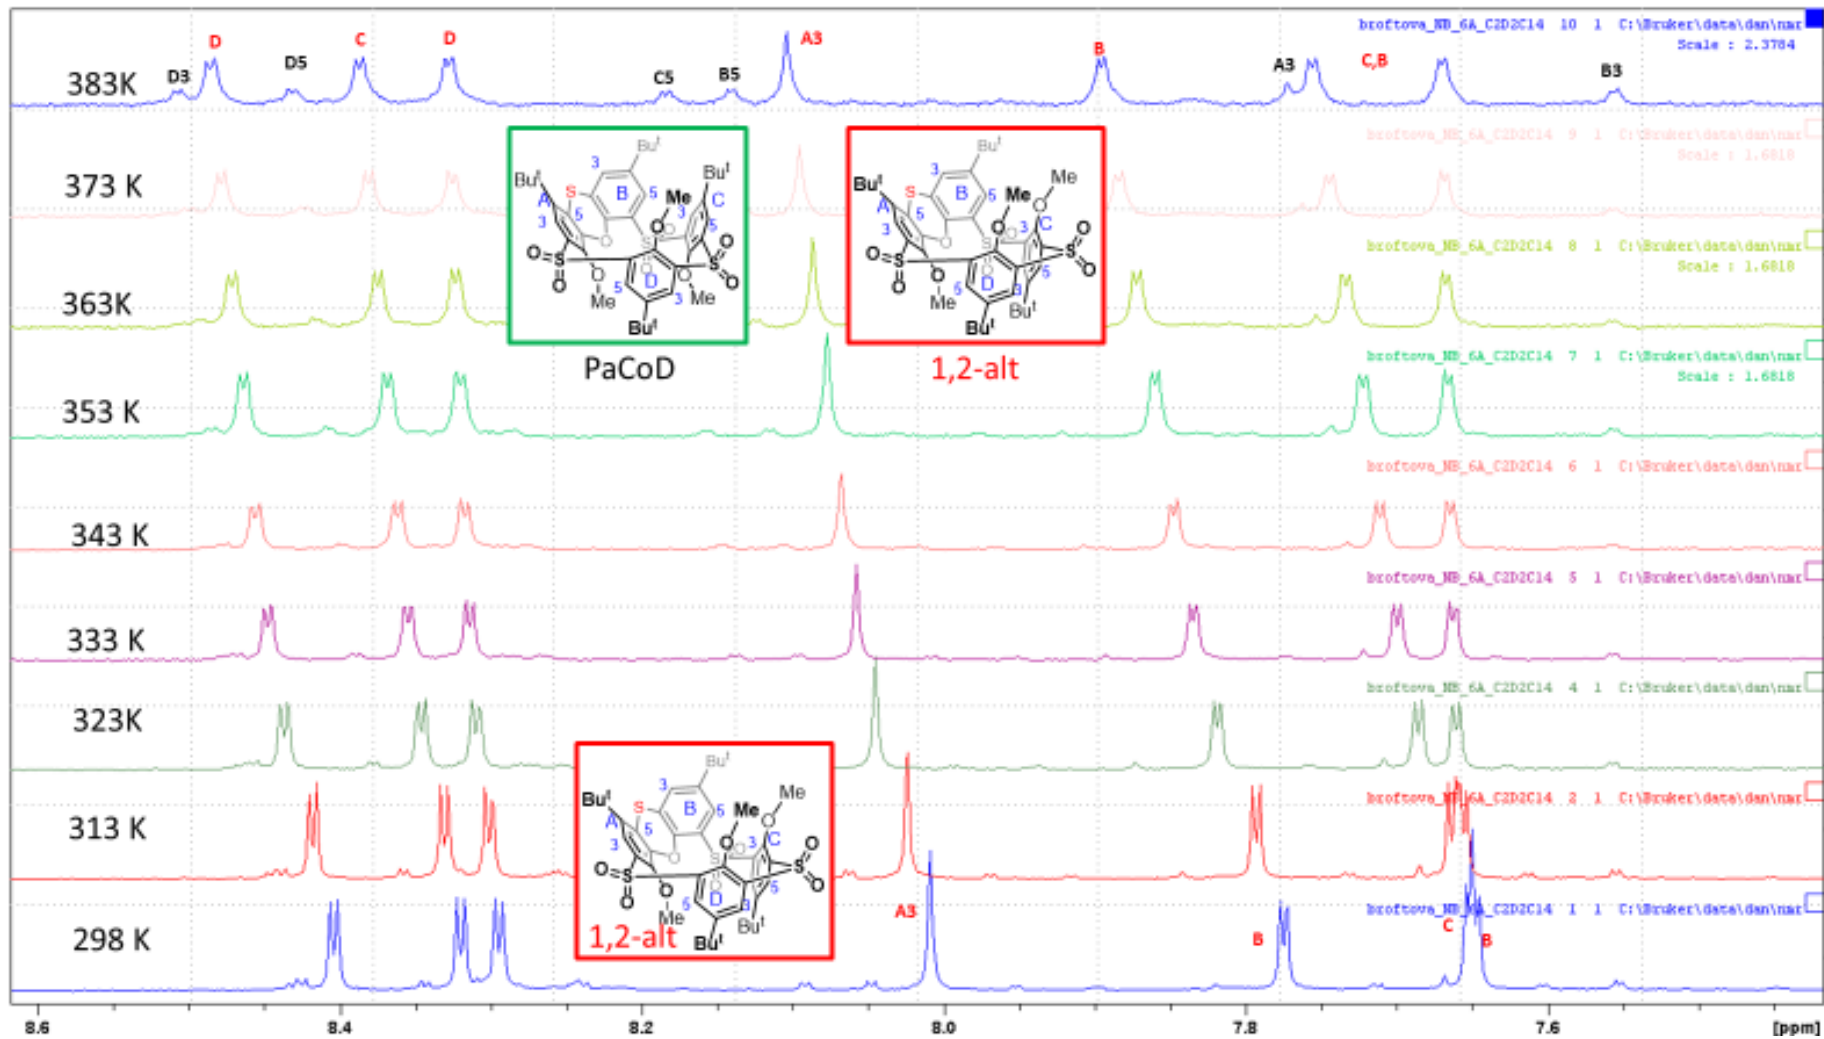

**Figure 38:** VT NMR spectrum – aromatic region (heating) of compound **12b** (600 MHz, CD<sub>2</sub>Cl<sub>2</sub>)

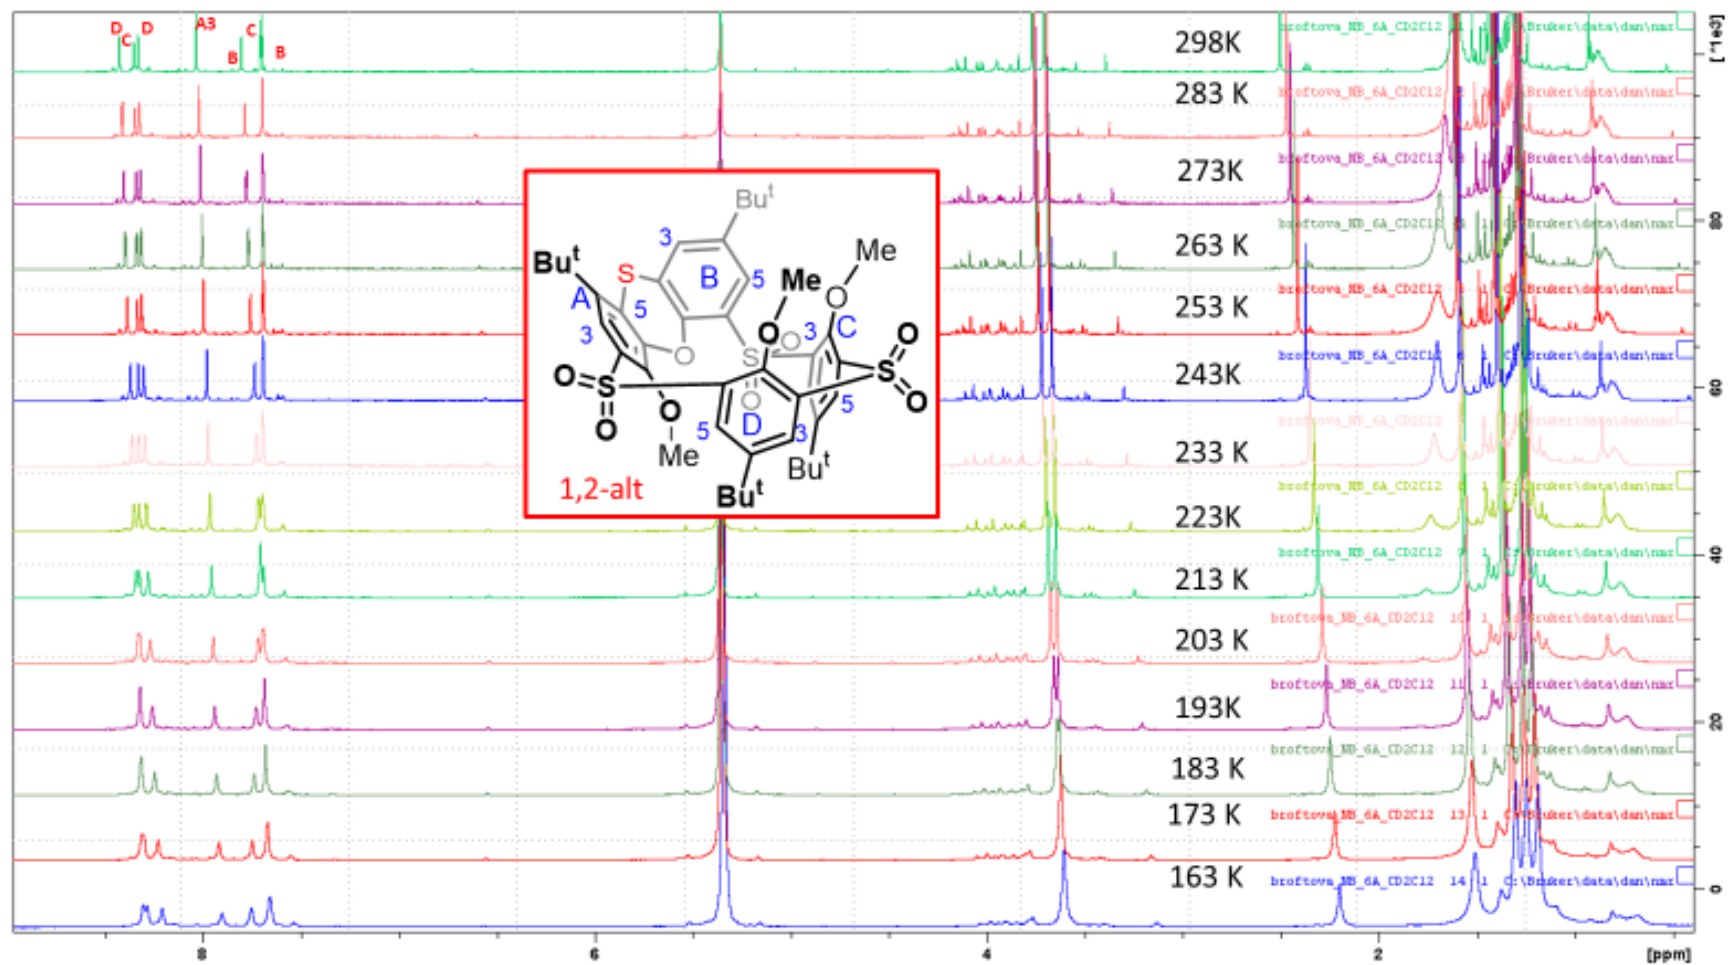

**Figure 39:** VT NMR spectrum (cooling) of compound **12b** (600 MHz, CD<sub>2</sub>Cl<sub>2</sub>)

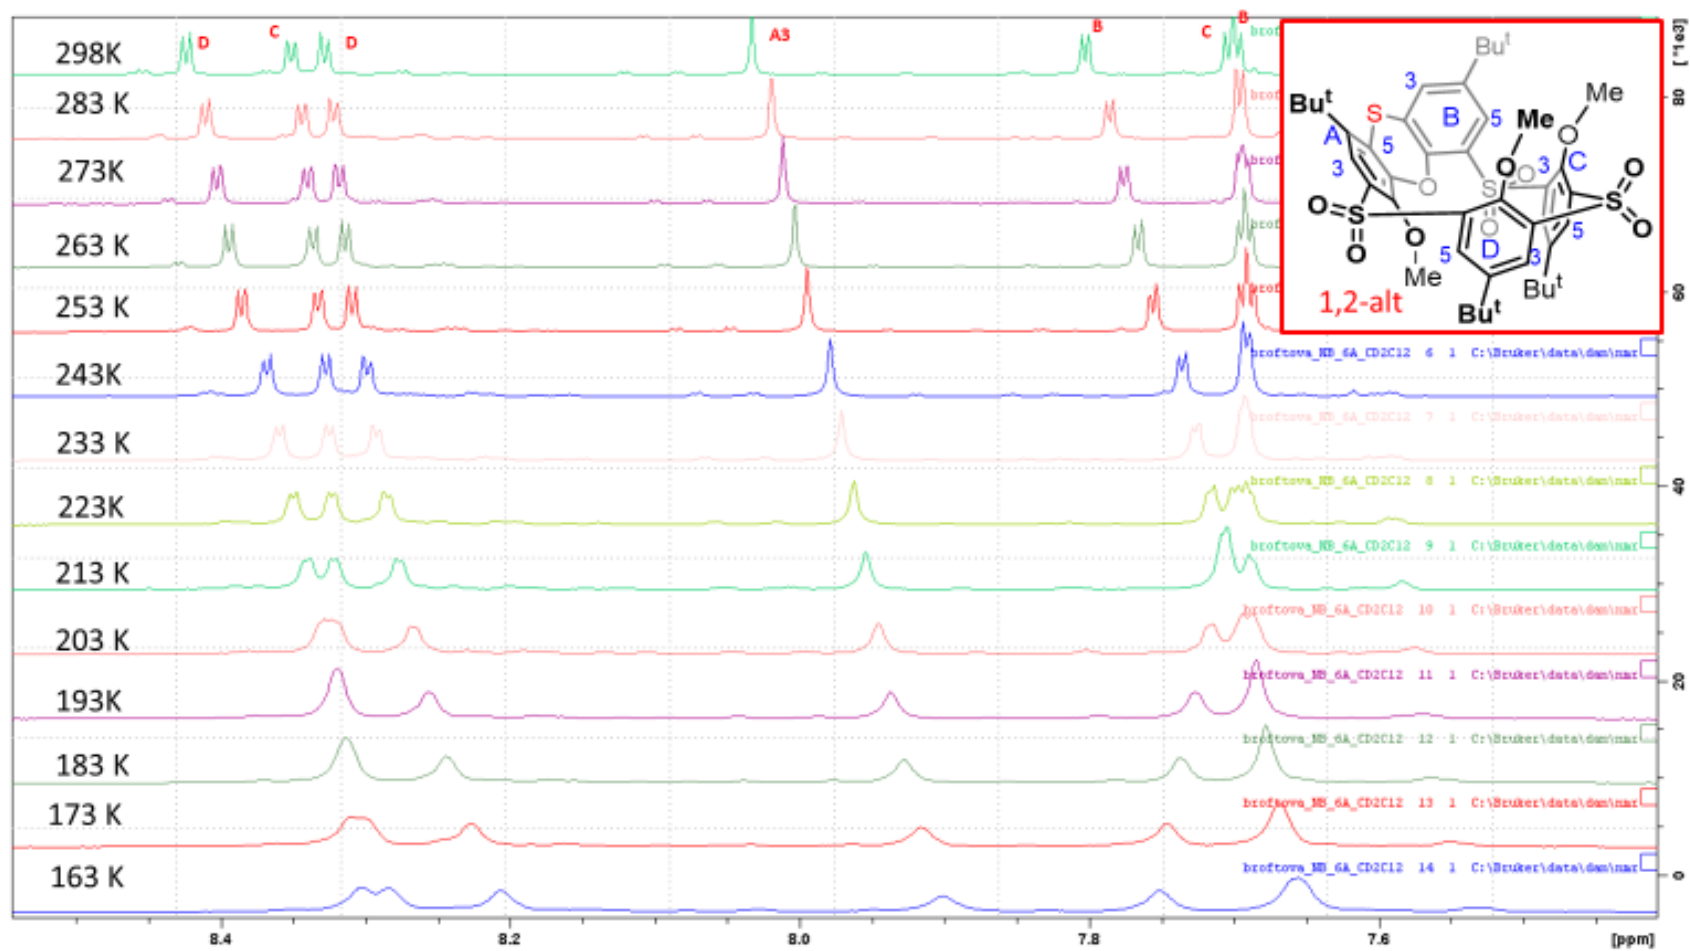

**Figure 40:** VT NMR spectrum – aromatic region (cooling) of compound **12b** (600 MHz, CD<sub>2</sub>Cl<sub>2</sub>)

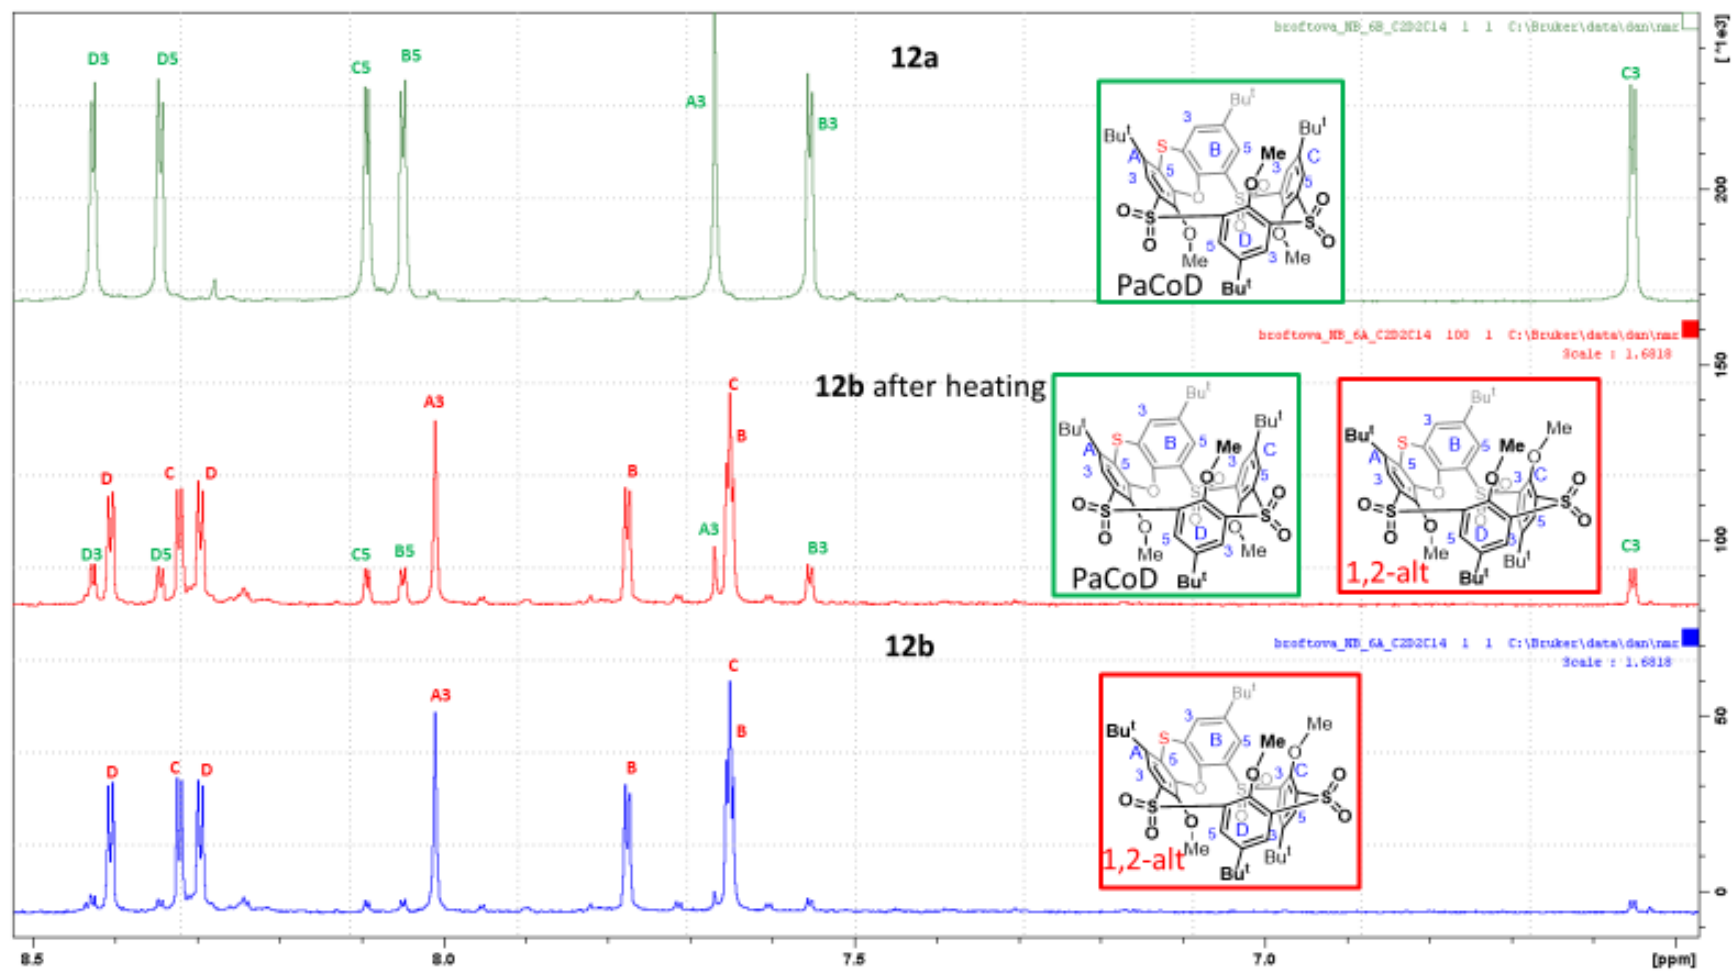

**Figure 41:** The change of conformation of **12b** (heating 15 min at 140 °C)

### 3. UV/VIS spectra

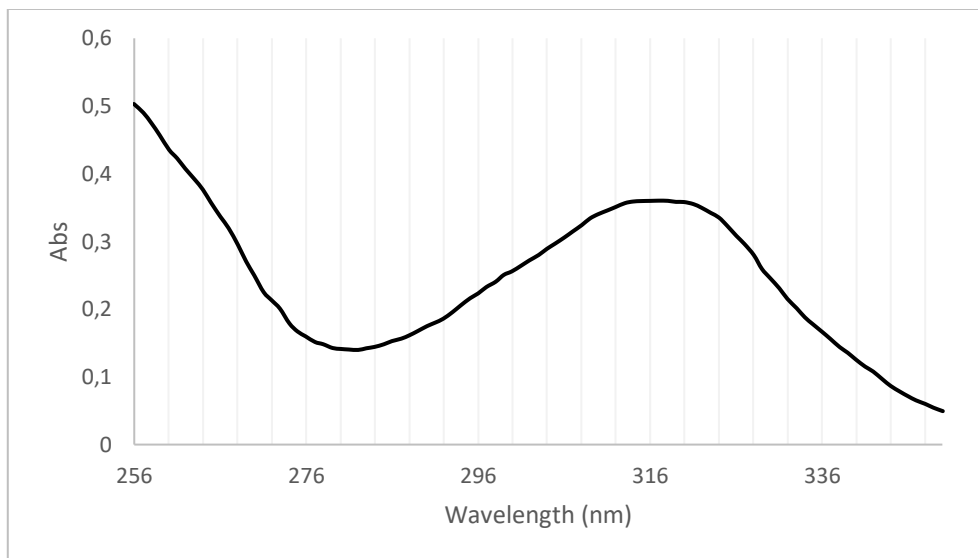

**Figure 42:** UV/VIS spectrum of compound **8**

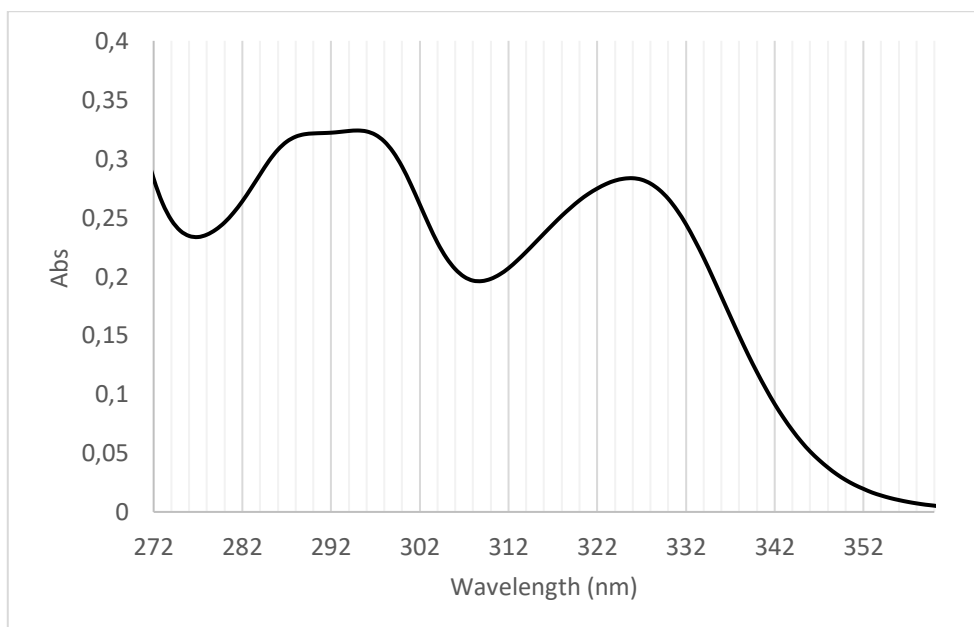

**Figure 43:** UV/VIS spectrum of compound **9a**

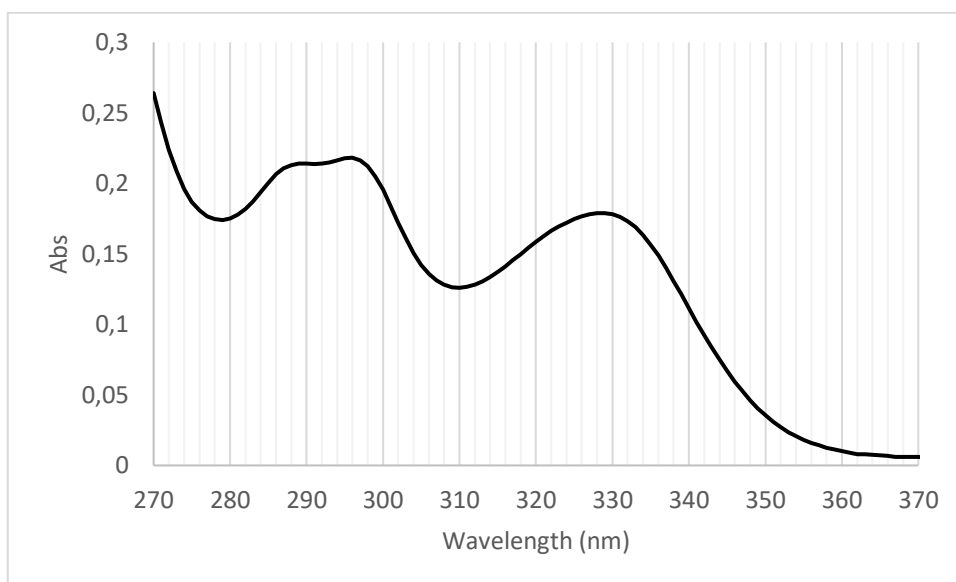

**Figure 44:** UV/VIS spectrum of compound **9b**

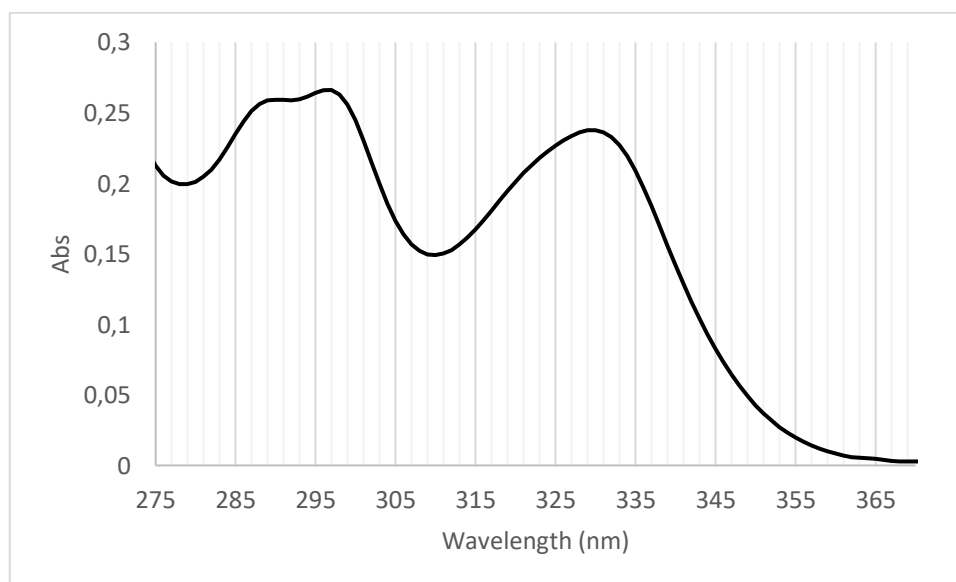

**Figure 45:** UV/VIS spectrum of compound **9c**

## 4. Theoretical calculations

Structure sulphide **12a** (Phenoxathiin – S as sulphide)

109

|   |                   |                   |                   |
|---|-------------------|-------------------|-------------------|
| C | 0.83198511563584  | 1.55942344053399  | -1.26772123336555 |
| O | 1.35042881019171  | 0.49660975509166  | -1.96668572551576 |
| C | 2.58785597970990  | 0.01783313510364  | -1.68646374639625 |
| C | 3.64361513942194  | 0.86075067483448  | -1.34761256685644 |
| C | 4.90966201217401  | 0.31900857655479  | -1.08306511009236 |
| C | 5.14696834603496  | -1.06236513280573 | -1.15459677542336 |
| C | 4.05261163113682  | -1.89908765002479 | -1.43518801667217 |
| C | 2.78855217644648  | -1.36574429994372 | -1.67103153623820 |
| S | 1.36353466917384  | -2.46581353030054 | -1.57419565360951 |
| C | 0.75836417837403  | -2.02336169995271 | 0.08192396015764  |
| C | 1.65710829347953  | -1.49821395707362 | 1.01376012079234  |
| C | 1.26208032273013  | -1.08654002537840 | 2.29460510530357  |
| C | -0.07809293608192 | -1.27686878608596 | 2.63627972015822  |
| C | -0.96428943772958 | -1.85472526795120 | 1.72931469579569  |
| S | -2.67577954658064 | -2.04534705904006 | 2.24387968883595  |
| C | -3.49422425655698 | -0.93425483688529 | 1.09686301642273  |
| C | -4.37984230982009 | -1.49322703233799 | 0.18372257385170  |
| C | -4.92496591387769 | -0.73468876202045 | -0.86149725147355 |
| C | -4.50467966399849 | 0.59655009463133  | -0.97382102625160 |
| C | -3.60315204828691 | 1.14552399966707  | -0.05984568114208 |
| S | -2.94701514796009 | 2.78282097458553  | -0.42604393807999 |
| C | -1.15345580307065 | 2.58756548634839  | -0.43302769114503 |
| C | -0.38445126107653 | 3.62121100325670  | 0.09516855914388  |
| C | 1.01296198961384  | 3.67061682990458  | -0.04721256477807 |
| C | 1.61583280540355  | 2.61765163744180  | -0.78641034000810 |
| S | 3.35483781733997  | 2.61261694155131  | -1.25527963909809 |
| C | -0.59069167782562 | -2.22842698193283 | 0.42927627795943  |
| C | -3.09988431125117 | 0.41028968800981  | 1.01702818573818  |
| C | -0.55943761179763 | 1.51371067961639  | -1.09818479149950 |
| O | -1.51657603797320 | -2.69966978420231 | -0.42914025250427 |
| C | -1.50244284898385 | -4.10444667081080 | -0.71496147091542 |
| O | -2.15764393437139 | 0.92993278635957  | 1.84214542348831  |
| C | -2.63672601012989 | 1.60233098953619  | 3.01882317000112  |
| O | -1.27027152363979 | 0.43587908106569  | -1.48697801701660 |
| C | -1.51425216427891 | 0.24196566912368  | -2.88427833289340 |
| O | 0.36468194934333  | -2.13679400524437 | -2.59192555600788 |
| O | 1.89049865997808  | -3.83892096780099 | -1.49326532638155 |
| O | -2.78553485564360 | -1.52856720929705 | 3.61716901628443  |
| O | -3.12806012639590 | -3.41372171868560 | 1.94867501709242  |
| O | -3.35213679749914 | 3.08959672410144  | -1.80915263676091 |
| O | -3.28695412186950 | 3.73130388634779  | 0.64729164755622  |
| C | 6.51327251537895  | -1.69152362802501 | -0.84735790252202 |
| C | 6.37372322667644  | -2.57926556624586 | 0.40849238177112  |
| C | 7.59110572493762  | -0.63321779488321 | -0.57345386229353 |



|   |                   |                   |                   |
|---|-------------------|-------------------|-------------------|
| C | 6.95814750062401  | -2.54953600709998 | -2.05005164998494 |
| C | 2.27728009271792  | -0.39399547011683 | 3.21371946373097  |
| C | 2.78120007328060  | 0.87826820762881  | 2.49777096290808  |
| C | 3.46138549495222  | -1.34107744518144 | 3.49367134184719  |
| C | 1.64368943252242  | 0.01496155836937  | 4.55399044007914  |
| C | -5.84029718644187 | -1.41331915135121 | -1.88824871253804 |
| C | -4.98873138837407 | -2.40779774870083 | -2.70858082897974 |
| C | -6.47373339749320 | -0.39718789083368 | -2.84663155782239 |
| C | -6.96671662957671 | -2.17418862505274 | -1.16172207713660 |
| C | 1.80436276562672  | 4.85418087908177  | 0.55097095131007  |
| C | 0.88002689847626  | 5.80813789579615  | 1.32909443773721  |
| C | 2.46129777215988  | 5.67699662033606  | -0.57994655725828 |
| C | 2.86895729023670  | 4.34492288276638  | 1.54816284933433  |
| H | 5.70702288067948  | 1.00344819786989  | -0.79419170786529 |
| H | 4.13916229657888  | -2.98609013773479 | -1.40564767205801 |
| H | 2.69759256552813  | -1.37043783604377 | 0.72519729455163  |
| H | -0.47895968033977 | -0.97217729187379 | 3.60053935804514  |
| H | -4.59329449855352 | -2.55744108138531 | 0.28521809365772  |
| H | -4.81845662149788 | 1.22793256348482  | -1.80349540393610 |
| H | -0.91883007880781 | 4.40765766443438  | 0.62238128250258  |
| H | -2.20126603443745 | -4.25399535558157 | -1.54683548103581 |
| H | -0.50045802307624 | -4.44069317611961 | -1.02067076979371 |
| H | -1.84980328944993 | -4.65931380057891 | 0.16994541104452  |
| H | -3.13845056400248 | 0.88024106031886  | 3.67959986077957  |
| H | -3.30301079231108 | 2.42999969086540  | 2.73596489548680  |
| H | -1.74675980129878 | 2.00792866513039  | 3.51804335655623  |
| H | -1.95388597686220 | -0.75770019154384 | -2.97033138314871 |
| H | -0.57576023087571 | 0.26155401856660  | -3.45329093428875 |
| H | -2.21229200429078 | 1.01527140534137  | -3.24262477215229 |
| H | 5.65152789214930  | -3.39501720181080 | 0.25741979311519  |
| H | 6.03568240288934  | -1.98183759541982 | 1.27055842408721  |
| H | 7.34202542138185  | -3.03681730511299 | 0.66813288188933  |
| H | 8.54842180923269  | -1.13260983363065 | -0.35893490612646 |
| H | 7.74615023223913  | 0.03020641491187  | -1.43880805164726 |
| H | 7.34394550290938  | -0.00983191134952 | 0.30020058815979  |
| H | 7.07583566732362  | -1.92924169582483 | -2.95238516572978 |
| H | 7.92457201689962  | -3.03505933080399 | -1.83864134027675 |
| H | 6.22930953054665  | -3.34096593719147 | -2.27848662029282 |
| H | 1.94130187183983  | 1.54006309523299  | 2.23997125846868  |
| H | 3.47703336557667  | 1.43859615239368  | 3.14244435446698  |
| H | 3.31542602393893  | 0.64366937695622  | 1.56462507404359  |
| H | 4.21178425763914  | -0.83903457727901 | 4.12615296176131  |
| H | 3.12272135440319  | -2.24748694920988 | 4.01937543578395  |
| H | 3.96325108077381  | -1.65611023805743 | 2.56620063076106  |
| H | 2.39420577881754  | 0.52074319443050  | 5.18137557849537  |
| H | 1.26902247026925  | -0.85568717510723 | 5.11418835622888  |
| H | 0.80465390084055  | 0.71325669160707  | 4.41008721205743  |
| H | -5.61662418095506 | -2.94130890165719 | -3.44123851622688 |
| H | -4.51010448666933 | -3.15710643179934 | -2.06038261465251 |
| H | -4.19193534559689 | -1.87919008251790 | -3.25428110681753 |
| H | -7.06599254854445 | 0.35483989074805  | -2.30175725166751 |

|   |                   |                   |                   |
|---|-------------------|-------------------|-------------------|
| H | -5.71788881191040 | 0.13188648593948  | -3.44790695817618 |
| H | -7.14613515396052 | -0.91873009576074 | -3.54570297805455 |
| H | -7.62112994918665 | -2.67449490724599 | -1.89396420203036 |
| H | -7.58572656894829 | -1.48719135847039 | -0.56257247261956 |
| H | -6.57315858642567 | -2.94883947997859 | -0.48658642779297 |
| H | 0.12741356797969  | 6.27996823067208  | 0.67929315783097  |
| H | 0.35740812250615  | 5.29127689415667  | 2.14892604607687  |
| H | 1.48538923112816  | 6.61198930624931  | 1.77422902593998  |
| H | 3.00646971833924  | 6.53275039573001  | -0.15056065732557 |
| H | 3.18125951211665  | 5.09781508767140  | -1.17527261447249 |
| H | 1.69481130385908  | 6.06703641823122  | -1.26774197605344 |
| H | 2.38865415504861  | 3.83102924085396  | 2.39401694466813  |
| H | 3.43839901298817  | 5.19872328099131  | 1.94885670401589  |
| H | 3.58255354818536  | 3.65008557222264  | 1.08677332332768  |

Structure 9a (Phenoxathiin – S as sulfoxide, oxygen out)

110

|   |                   |                   |                   |
|---|-------------------|-------------------|-------------------|
| C | 0.80723576181126  | 1.51281593446400  | -0.89253544595081 |
| O | 1.22843746852186  | 0.48604071183256  | -1.68439334254513 |
| C | 2.47548416559911  | -0.01164126670247 | -1.60837386857684 |
| C | 3.57311433092587  | 0.74153477403074  | -1.21028673546198 |
| C | 4.83276916607011  | 0.13420687615754  | -1.09061188120478 |
| C | 5.01480044201063  | -1.23230760363458 | -1.33950524722415 |
| C | 3.87360676889190  | -1.98706372923897 | -1.68111923839450 |
| C | 2.62612863169721  | -1.39183058137302 | -1.80174364498865 |
| S | 1.15603219834203  | -2.44318212428805 | -1.76696017500968 |
| C | 0.57462794429469  | -2.10590763407680 | -0.07183022909809 |
| C | 1.48292508523372  | -1.60670783557878 | 0.87304601952706  |
| C | 1.10323192983872  | -1.28908455746323 | 2.17908144681122  |
| C | -0.22126968814034 | -1.56122749426673 | 2.53938853704034  |
| C | -1.11870211717032 | -2.08423698899971 | 1.61857396453946  |
| S | -2.82241211105875 | -2.26735367397944 | 2.17622813016782  |
| C | -3.60741042506489 | -1.00445609809893 | 1.17695111514402  |
| C | -4.45179424797695 | -1.42027238731821 | 0.15347789817528  |
| C | -4.93316491010230 | -0.52048707282843 | -0.80991351297345 |
| C | -4.49241214924956 | 0.80580365737080  | -0.71971844583469 |
| C | -3.63361175092062 | 1.20994726897027  | 0.30701458640526  |
| S | -2.88369479239873 | 2.83733255886610  | 0.18669418092522  |
| C | -1.10309235021261 | 2.53022399468100  | 0.10715118746854  |
| C | -0.26477848021215 | 3.42519974234463  | 0.77448068919378  |
| C | 1.12658007801596  | 3.41296508251361  | 0.61240866402652  |
| C | 1.65982255801666  | 2.42790125143064  | -0.26551382848176 |
| S | 3.39190896888520  | 2.51498254913035  | -0.88018270514391 |
| C | -0.76396495411435 | -2.35287681001875 | 0.28142527293771  |
| C | -3.19356855671168 | 0.33159880677583  | 1.29909926646655  |
| C | -0.59040100669098 | 1.53609291786851  | -0.71920749842821 |
| O | -1.69876741649526 | -2.76398143241624 | -0.60007913317041 |
| C | -1.71733411097402 | -4.15618938359602 | -0.94747184226960 |
| O | -2.29024716151371 | 0.72856812275632  | 2.23086214945074  |
| C | -2.83274990475359 | 1.23676113431778  | 3.46247589792749  |

|   |                   |                   |                   |
|---|-------------------|-------------------|-------------------|
| O | -1.36204838806819 | 0.55798516458013  | -1.23234574787599 |
| C | -1.59691085011251 | 0.52787832422665  | -2.64513625435563 |
| O | 0.16722261189782  | -2.00160307509900 | -2.75188703913218 |
| O | 1.63760673578914  | -3.83488221848651 | -1.80177295384053 |
| O | -2.85708322241475 | -1.88631531644509 | 3.59724675517676  |
| O | -3.35252202366964 | -3.57160343765023 | 1.75828911787647  |
| O | -3.27474658766487 | 3.37649247473571  | -1.12527825868836 |
| O | -3.13565218971746 | 3.62134248898826  | 1.40538642046192  |
| C | 6.35423228080319  | -1.95648874970874 | -1.14162637530500 |
| C | 7.50549113948345  | -0.98236445703178 | -0.85429021906801 |
| C | 6.69821891499368  | -2.76485579746061 | -2.41004504540080 |
| C | 6.20871513216223  | -2.90844575890736 | 0.06614667411280  |
| C | 2.04250441196337  | -0.60933214409527 | 3.18261672024143  |
| C | 2.29256734341803  | -1.55718675463687 | 4.37244534699923  |
| C | 1.35788296844090  | 0.68529058244293  | 3.67882481810221  |
| C | 3.39153108787889  | -0.23963551236942 | 2.54298305615464  |
| C | -5.79968235787005 | -1.04754044842704 | -1.96332364264724 |
| C | -7.02697958873271 | -1.79156722884068 | -1.39582925339889 |
| C | -4.95026601322106 | -2.02544478716172 | -2.80569566427632 |
| C | -6.29206522197850 | 0.08482660313031  | -2.87468275463929 |
| C | 1.99555287592230  | 4.45797515673801  | 1.34523276710737  |
| C | 1.15359318958635  | 5.31542484876504  | 2.30874418996161  |
| C | 2.63443872144688  | 5.42397391774060  | 0.32173956844578  |
| C | 3.06944520580516  | 3.75186049431551  | 2.19980147628706  |
| H | 5.67033446815305  | 0.75444486309989  | -0.76900902070706 |
| H | 3.91933443730954  | -3.07242470651271 | -1.78528850276941 |
| H | 2.51091886034074  | -1.43189696278127 | 0.57390905253090  |
| H | -0.59895472605987 | -1.34584955044156 | 3.53781543751410  |
| H | -4.68491614489736 | -2.48386402716135 | 0.10197942686140  |
| H | -4.74710941583132 | 1.54867466852970  | -1.47387733875530 |
| H | -0.74795132979482 | 4.15537496671885  | 1.41826164906407  |
| H | -0.72490317906623 | -4.49441094636233 | -1.28167741764581 |
| H | -2.06557893628076 | -4.74474655721109 | -0.08489812612707 |
| H | -2.42965192105039 | -4.25471301580727 | -1.77562574523900 |
| H | -1.97240980854808 | 1.57501472000036  | 4.05318882130451  |
| H | -3.35885066524762 | 0.43061000439531  | 3.99368207624695  |
| H | -3.48947259895926 | 2.09386764701700  | 3.25732372955122  |
| H | -2.32702623275711 | 1.30987841744960  | -2.90704775177806 |
| H | -1.98639361308960 | -0.47274661376891 | -2.86050487607858 |
| H | -0.66366300637978 | 0.66610680259917  | -3.20671600302487 |
| H | 7.34904427052017  | -0.42219088974859 | 0.08106604692308  |
| H | 7.64890681538908  | -0.25892190781385 | -1.67208904436742 |
| H | 8.44263695643291  | -1.54929765042306 | -0.74199269018159 |
| H | 5.92093330722065  | -3.50529434596431 | -2.64996752900673 |
| H | 6.81233111696540  | -2.10001114890982 | -3.28046736416248 |
| H | 7.64506949416261  | -3.31022718330771 | -2.26944774468617 |
| H | 7.15345834365507  | -3.44385925753195 | 0.25356659212005  |
| H | 5.95034918755366  | -2.34129813798098 | 0.97548716757682  |
| H | 5.42496274913234  | -3.66319573895122 | -0.09655204574933 |
| H | 2.80099591285169  | -2.47580783359601 | 4.03931131657359  |
| H | 2.92782328474977  | -1.06801805775305 | 5.12896789938367  |

|   |                   |                   |                   |
|---|-------------------|-------------------|-------------------|
| H | 1.35094594220055  | -1.85153325460166 | 4.86146386260727  |
| H | 2.02261288952328  | 1.23058476953895  | 4.36772172782481  |
| H | 1.10507610033169  | 1.34627724633955  | 2.83596707309645  |
| H | 0.42718835071239  | 0.46888677849754  | 4.22377132320147  |
| H | 4.02591482286116  | 0.27556252961078  | 3.28056675568006  |
| H | 3.26005524797995  | 0.43667287201316  | 1.68533266296629  |
| H | 3.94117246004653  | -1.12862386226224 | 2.19519998976002  |
| H | -7.64443934499181 | -2.18288265321814 | -2.22045673096968 |
| H | -7.65212356393465 | -1.11783582683881 | -0.78895479836921 |
| H | -6.73651348649161 | -2.64348566388254 | -0.76268736632227 |
| H | -4.08085513577764 | -1.51271101571668 | -3.24446019066891 |
| H | -4.57221717468545 | -2.86103081236078 | -2.19819723676444 |
| H | -5.55329820538488 | -2.44727314924764 | -3.62613709159420 |
| H | -6.88535809447698 | 0.82571768584250  | -2.31605571135898 |
| H | -6.93276921806674 | -0.33111027563054 | -3.66785442824492 |
| H | -5.45899787618239 | 0.61060811889095  | -3.36562434072783 |
| H | 1.81776163354314  | 6.01707726020500  | 2.83674103291289  |
| H | 0.39822428100132  | 5.91275114263784  | 1.77758907928983  |
| H | 0.64310824091224  | 4.70384789945007  | 3.06856084516971  |
| H | 1.84997260386287  | 5.97380859677427  | -0.22216089663380 |
| H | 3.26614562025971  | 6.15621951959525  | 0.85011204465303  |
| H | 3.25119673365175  | 4.92796886048081  | -0.43832002468253 |
| H | 3.67998330193546  | 4.50142884586715  | 2.72855221202405  |
| H | 3.75128168612712  | 3.13370519550905  | 1.60042904251124  |
| H | 2.59145352643999  | 3.10833045739452  | 2.95229461017321  |
| O | 3.30960357939263  | 3.23538788175369  | -2.20318942205452 |

Structure 10a (Phenoxathiin – S as sulfoxide, oxygen in)

110

|   |                   |                   |                   |
|---|-------------------|-------------------|-------------------|
| C | -0.71964553315057 | -1.63727758336196 | -1.21805853632555 |
| O | -1.14718302099428 | -0.68335508255730 | -2.11394479663374 |
| C | -2.38662759849035 | -0.15018470075437 | -2.01093631570837 |
| C | -3.47272030398726 | -0.91451333381283 | -1.62056321951517 |
| C | -4.72707299624676 | -0.33879963558664 | -1.40473107979604 |
| C | -4.92717866265201 | 1.03452563741995  | -1.59774371643489 |
| C | -3.81343126286216 | 1.80711991650773  | -1.97996855153105 |
| C | -2.55816895037251 | 1.23160355743166  | -2.15768370524207 |
| S | -1.11289587705256 | 2.30908959570873  | -2.08270221892688 |
| C | -0.60727454749293 | 2.00108023549210  | -0.35826294430034 |
| C | -1.51715128513871 | 1.41546764468850  | 0.53230182867533  |
| C | -1.18806152296068 | 1.13212230447186  | 1.85887601939174  |
| C | 0.07988952715233  | 1.52633276473408  | 2.29857046482621  |
| C | 0.97958270146306  | 2.12846120022136  | 1.42816659526276  |
| S | 2.64342371963192  | 2.40577155296562  | 2.06238372919320  |
| C | 3.51465389839162  | 1.17041444384514  | 1.09796224081083  |
| C | 4.35104623246190  | 1.62112498183648  | 0.08366144194882  |
| C | 4.87431629977216  | 0.74566025669854  | -0.87961991409036 |
| C | 4.49756793335978  | -0.60057955377038 | -0.79002712939162 |
| C | 3.64559512095675  | -1.04172552598560 | 0.22823687630446  |

|   |                   |                   |                   |
|---|-------------------|-------------------|-------------------|
| S | 2.99228135433335  | -2.71170450116914 | 0.12945298051867  |
| C | 1.20052404114360  | -2.50719629443164 | -0.09001112054807 |
| C | 0.38510538320895  | -3.45956341488801 | 0.51587349364025  |
| C | -0.99446560445240 | -3.56043156031370 | 0.27513892030455  |
| C | -1.55037557334793 | -2.60085938580763 | -0.62147577604584 |
| S | -3.28669119220771 | -2.68827542862226 | -1.30819494182161 |
| C | 0.68088773711482  | 2.36239842782523  | 0.07114640066436  |
| C | 3.15091232113219  | -0.18215689613997 | 1.21149454816552  |
| C | 0.66444120889779  | -1.55973894190279 | -0.95865712105891 |
| O | 1.62201272012678  | 2.84320541285137  | -0.76859506668246 |
| C | 1.58919991408164  | 4.24797582028179  | -1.06404149408328 |
| O | 2.24584636739733  | -0.61819085000926 | 2.12204192883258  |
| C | 2.76872637025781  | -1.06796564043617 | 3.38508426212937  |
| O | 1.39651289480862  | -0.54034178840719 | -1.44850929841795 |
| C | 1.72851688807431  | -0.53115845395149 | -2.84158415692761 |
| O | -0.08056769106819 | 1.86779637657231  | -3.02107325701975 |
| O | -1.60961094406905 | 3.69359559206887  | -2.15806136094660 |
| O | 2.63946883566977  | 2.03712444990527  | 3.48652306539800  |
| O | 3.13359710747761  | 3.72904122132450  | 1.65491864391778  |
| O | 3.51641451413406  | -3.29613071308224 | -1.11494985828880 |
| O | 3.19021495287008  | -3.42510193005189 | 1.40107638248374  |
| C | -6.26177703193883 | 1.72848178262596  | -1.29238538739521 |
| C | -6.04216003250589 | 2.68131630619757  | -0.09662925795336 |
| C | -7.35988720964444 | 0.72361354710562  | -0.91519885143388 |
| C | -6.72187101123563 | 2.52942170753869  | -2.52701431082356 |
| C | -2.12429166052573 | 0.36056759228483  | 2.79491452707917  |
| C | -2.56343315454864 | 1.28346470154994  | 3.94887336398850  |
| C | -1.34853912621555 | -0.85145993275746 | 3.35819511655625  |
| C | -3.37315112823598 | -0.15369306521470 | 2.05962784846866  |
| C | 5.70772581097195  | 1.32162815434180  | -2.03406334126377 |
| C | 6.88359566322826  | 2.14536773124755  | -1.46930923418165 |
| C | 4.79745484161464  | 2.24111383881934  | -2.88078369721029 |
| C | 6.26963907312457  | 0.21956377651070  | -2.94119060134739 |
| C | -1.77784473890309 | -4.69814840605579 | 0.97409598763933  |
| C | -2.73480650103755 | -4.10507367159244 | 2.03105074245901  |
| C | -0.82487367318303 | -5.65656595772229 | 1.71593405801257  |
| C | -2.54398184198325 | -5.55631367607833 | -0.05715380376896 |
| H | -5.51511073737615 | -0.99063630359665 | -1.02971263128240 |
| H | -3.87461526810887 | 2.89383383445455  | -2.05728616977211 |
| H | -2.50698388175364 | 1.15030433720955  | 0.18217781648773  |
| H | 0.41542491937805  | 1.34375180361439  | 3.31826799131396  |
| H | 4.53799177198267  | 2.69391057005175  | 0.03449730056745  |
| H | 4.80090117033336  | -1.33418358003772 | -1.53522948688887 |
| H | 0.87945022608276  | -4.15619337002552 | 1.18696155013084  |
| H | 2.35204971272955  | 4.41381296798644  | -1.83422948569423 |
| H | 0.60439492725660  | 4.54174278363739  | -1.45755636534918 |
| H | 1.84534988554103  | 4.82156997814007  | -0.16076925912499 |
| H | 3.47513681633491  | -1.89386488455892 | 3.22329065627593  |
| H | 1.90472697801240  | -1.43805653771596 | 3.95084822783326  |
| H | 3.23180571118854  | -0.22351142022299 | 3.91489099199757  |
| H | 2.50408282379309  | -1.28923987627357 | -3.03778668399907 |

|   |                   |                   |                   |
|---|-------------------|-------------------|-------------------|
| H | 2.09321482344184  | 0.47937992328484  | -3.05155127647730 |
| H | 0.84247641937639  | -0.71439270439293 | -3.46321763960961 |
| H | -5.69409062293975 | 2.11924349642272  | 0.78494590128009  |
| H | -6.98308307825988 | 3.18804395791764  | 0.17177706069713  |
| H | -5.29518784877762 | 3.45715050384406  | -0.31988501356032 |
| H | -7.56151283763553 | 0.00869799877574  | -1.72812142640702 |
| H | -7.10311571344368 | 0.15019658882891  | -0.01094605088001 |
| H | -8.29528594731878 | 1.26500995599335  | -0.70617370580814 |
| H | -6.88948731890939 | 1.86284602201973  | -3.38726345318579 |
| H | -7.66581632917066 | 3.05528080453622  | -2.31180111704422 |
| H | -5.98023981705822 | 3.28570209158394  | -2.82415219473229 |
| H | -3.14168573946388 | 2.13936384513859  | 3.56592050638709  |
| H | -3.19763173446574 | 0.73182247511207  | 4.66202707700519  |
| H | -1.69664498674383 | 1.67858420504144  | 4.50110139539992  |
| H | -0.94228201032225 | -1.46924682867544 | 2.54386973425651  |
| H | -0.50741190609966 | -0.53549802453156 | 3.99214390907192  |
| H | -2.01189234773400 | -1.47754247164631 | 3.97562592654768  |
| H | -4.02323519258935 | -0.69674526512216 | 2.76164221953749  |
| H | -3.12370518632712 | -0.85101396164996 | 1.24732720885411  |
| H | -3.96654584548886 | 0.67046820635645  | 1.63214554767960  |
| H | 7.48055576938815  | 2.56528371963212  | -2.29491560185520 |
| H | 7.54543830133224  | 1.51927262468709  | -0.85040378336549 |
| H | 6.53669994574020  | 2.98568054651768  | -0.84916784230951 |
| H | 4.34834297029514  | 3.03979855182877  | -2.27263171446340 |
| H | 5.37722381077304  | 2.71250880868283  | -3.69078249435235 |
| H | 3.97483900796017  | 1.66745611131440  | -3.33327631172674 |
| H | 6.88347978526306  | 0.67192016334296  | -3.73577160012466 |
| H | 5.46977895736623  | -0.35691484127377 | -3.43093091364400 |
| H | 6.90658288132502  | -0.48223715187041 | -2.37990513864030 |
| H | -3.47521812516179 | -3.43756024775573 | 1.57576327035901  |
| H | -3.27489877273649 | -4.92094992636357 | 2.53864741398041  |
| H | -2.16283043255802 | -3.55334845048719 | 2.79131071953357  |
| H | -0.10097115187152 | -6.13587261313977 | 1.03839229717203  |
| H | -0.26979458247402 | -5.15179937125578 | 2.52083924053378  |
| H | -1.42415333804826 | -6.45156953970861 | 2.18358022826627  |
| H | -3.38204700877824 | -5.02542807471114 | -0.52271670601869 |
| H | -2.98243233375030 | -6.42758548403932 | 0.45427081705236  |
| H | -1.86430564470567 | -5.92839764738579 | -0.83988624122647 |
| O | -4.34934332187708 | -2.96054854092460 | -0.26405818763517 |

## Structure 11a (Phenoxathiin – S as sulfone)

111

|   |                   |                   |                   |
|---|-------------------|-------------------|-------------------|
| C | 0.82702356456189  | 1.44225960384646  | -1.28754943633756 |
| O | 1.29392467199445  | 0.36321331739279  | -1.98703630399314 |
| C | 2.50997012882132  | -0.17403305789957 | -1.77201256662140 |
| C | 3.59254709531552  | 0.57942000475548  | -1.34286112043496 |
| C | 4.80632748215554  | -0.02547831751242 | -0.99304086203969 |
| C | 4.96686714036563  | -1.41253657308174 | -1.08499791315118 |
| C | 3.85749823141786  | -2.16820565044609 | -1.51656142536457 |
| C | 2.64270158384757  | -1.56841621740247 | -1.82509061264834 |
| S | 1.15619917918537  | -2.58575842922741 | -1.71690511014692 |
| C | 0.62039064808742  | -2.11075911515033 | -0.03727103738268 |
| C | 1.53808182602801  | -1.52942446853752 | 0.85249381578326  |
| C | 1.17353024493968  | -1.09581602294227 | 2.13056999594498  |
| C | -0.14499133500743 | -1.34157216672916 | 2.53000477143995  |
| C | -1.04687194728572 | -1.94693294741401 | 1.66696968382139  |
| S | -2.74360046964087 | -2.09681096558238 | 2.23531841962204  |
| C | -3.56223112074915 | -0.96936087777034 | 1.10487796240742  |
| C | -4.52287249709640 | -1.50487491919838 | 0.25830114729204  |
| C | -5.09635223547170 | -0.74573120688597 | -0.77107973097666 |
| C | -4.61208159152532 | 0.55584240846310  | -0.95530133920524 |
| C | -3.63969592538228 | 1.08372259129230  | -0.10178522402712 |
| S | -2.96381786159144 | 2.70591328986510  | -0.49973573867719 |
| C | -1.16209785023379 | 2.50035077440890  | -0.50041390676455 |
| C | -0.38579978690120 | 3.49966282153292  | 0.08132447239023  |
| C | 1.01660191962929  | 3.52197749224267  | 0.00938523373173  |
| C | 1.62810187141965  | 2.44590306348954  | -0.70469890278522 |
| S | 3.39520031494732  | 2.34412143660225  | -1.17581660616624 |
| C | -0.71157317731694 | -2.32666161919385 | 0.35423356105217  |
| C | -3.12249574550884 | 0.35810512521485  | 0.97440093082246  |
| C | -0.57859057184265 | 1.43720423890109  | -1.17755008587692 |
| O | -1.66363548469265 | -2.80067637080863 | -0.47397805903192 |
| C | -1.70937818738879 | -4.21712810710924 | -0.69806929406524 |
| O | -2.14219795533341 | 0.87796598176068  | 1.75418890388319  |
| C | -2.57108376964838 | 1.56744995757368  | 2.94237062336783  |
| O | -1.30156369447800 | 0.38156575317901  | -1.59610484087346 |
| C | -1.59727280419589 | 0.24345343533026  | -2.99240577453833 |
| O | 0.16029432012471  | -2.18519137787859 | -2.71056303303185 |
| O | 1.60558705746857  | -3.98753847118011 | -1.66478674856207 |
| O | -2.80011274949367 | -1.55990235101243 | 3.60326548502741  |
| O | -3.23905966624969 | -3.45549088175949 | 1.96872234269454  |
| O | -3.36357407603002 | 2.99358453549589  | -1.88736091776735 |
| O | -3.29057955513984 | 3.67151183868147  | 0.56140364946395  |
| C | 6.22549752743611  | -2.14238672580643 | -0.59888375169164 |
| C | 5.83465605083637  | -3.01560697822702 | 0.61580542198188  |
| C | 7.32334260489559  | -1.16168009863548 | -0.16359195178491 |
| C | 6.77366467989098  | -3.03954825690750 | -1.72500291145928 |
| C | 2.12111863381510  | -0.32001059486205 | 3.05651069554603  |
| C | 2.45514291772745  | -1.18524843016127 | 4.28847023315465  |
| C | 1.40547614287737  | 0.97549106907988  | 3.50413791487853  |

|   |                   |                   |                   |
|---|-------------------|-------------------|-------------------|
| C | 3.42649899466097  | 0.07074051074439  | 2.34614824350299  |
| C | -6.13930434712602 | -1.40191111530797 | -1.68149081302726 |
| C | -6.73216745134450 | -0.40470113394696 | -2.68493108959358 |
| C | -7.28259901843978 | -1.97308574891333 | -0.81722211956469 |
| C | -5.45433190581632 | -2.54733633894146 | -2.45806150912501 |
| C | 1.76714821702682  | 4.69762035321149  | 0.68112395205728  |
| C | 0.77794700189428  | 5.74420358004233  | 1.22836187444913  |
| C | 2.65972286162412  | 5.43592347234734  | -0.34000196233229 |
| C | 2.58225298084174  | 4.18948599828111  | 1.89167139283685  |
| H | 5.58929819871839  | 0.61781066838168  | -0.59467530189631 |
| H | 3.88070444408166  | -3.25943686178649 | -1.51063261489343 |
| H | 2.56352793294172  | -1.38420924593999 | 0.53354331405760  |
| H | -0.51385515329216 | -1.03875026737715 | 3.50884188178777  |
| H | -4.78320746869957 | -2.55416259452629 | 0.40109678970460  |
| H | -4.94480262892222 | 1.17840471670046  | -1.78478959302426 |
| H | -0.92488370870233 | 4.28720762948237  | 0.60022023551365  |
| H | -2.46533134929177 | -4.37534925705792 | -1.47690324454667 |
| H | -0.73748817365359 | -4.59347435841160 | -1.05116710532998 |
| H | -2.01858317723848 | -4.72603737941544 | 0.22737797766405  |
| H | -1.65950280679456 | 1.97010020211887  | 3.40279820467472  |
| H | -3.05563218991168 | 0.85719527905319  | 3.62794452375234  |
| H | -3.24128964355319 | 2.39690608375308  | 2.67463588203752  |
| H | -2.14755527406418 | -0.69989717195770 | -3.08097270996171 |
| H | -0.67430894177428 | 0.16859432408696  | -3.58188797579427 |
| H | -2.21698448558727 | 1.09198882518888  | -3.32111003257637 |
| H | 5.08486472162070  | -3.77641775957912 | 0.35217130629272  |
| H | 5.41567757933205  | -2.39558123069813 | 1.42353354829548  |
| H | 6.71981451568287  | -3.53770457138902 | 1.01222565761324  |
| H | 8.20488982805908  | -1.72482476069960 | 0.17878830213984  |
| H | 7.64110619564711  | -0.51192152493168 | -0.99393802760407 |
| H | 6.99913757359005  | -0.52107989020324 | 0.67111444028618  |
| H | 6.03186794365762  | -3.78194234410539 | -2.05586447648600 |
| H | 7.06723053894378  | -2.44033828732325 | -2.60079047764427 |
| H | 7.65980109637950  | -3.59043078726972 | -1.37177660845650 |
| H | 1.54428091683199  | -1.49591829922761 | 4.82408002256243  |
| H | 3.00021279163922  | -2.09528557099231 | 3.99214123295982  |
| H | 3.08790319956117  | -0.62198944779442 | 4.99359918450345  |
| H | 1.05385530069175  | 1.54777552159209  | 2.63283383368632  |
| H | 0.53537019396747  | 0.76079178300932  | 4.14222784507135  |
| H | 2.09195552877397  | 1.61247147902272  | 4.08371910265077  |
| H | 3.99137630677183  | -0.80911801842153 | 2.00235944676756  |
| H | 4.07621469647102  | 0.62999121764094  | 3.03606502317653  |
| H | 3.24521079258149  | 0.71914160873584  | 1.47853911108242  |
| H | -7.21877988417650 | 0.44102142785677  | -2.17425297783709 |
| H | -7.49192984082483 | -0.90963334434165 | -3.30144037143753 |
| H | -5.96676502182384 | -0.00137847980977 | -3.36631061800225 |
| H | -7.78949546324035 | -1.17266856105334 | -0.25524666591293 |
| H | -8.03067462817792 | -2.46965408025572 | -1.45541279094001 |
| H | -6.92062094742719 | -2.71668774940926 | -0.09089362439506 |
| H | -5.01165529583842 | -3.28957706032278 | -1.77677179794865 |
| H | -4.64739683917408 | -2.15790196032658 | -3.09824996685732 |



|   |                   |                   |                   |
|---|-------------------|-------------------|-------------------|
| H | -6.18350104680032 | -3.06994505491585 | -3.09899683938527 |
| H | 1.35382402778651  | 6.55791746913924  | 1.69305818274268  |
| H | 0.15524527585053  | 6.18620485503804  | 0.43564261810390  |
| H | 0.11676871721398  | 5.32893871204253  | 2.00406036815443  |
| H | 3.49200431144038  | 4.83613619239532  | -0.71762747124586 |
| H | 2.06152941535084  | 5.77398343915238  | -1.20016608557148 |
| H | 3.09815260223854  | 6.32408365367459  | 0.14147520439387  |
| H | 1.91179417089867  | 3.75054973627173  | 2.64450932422000  |
| H | 3.10514150503573  | 5.03901023064633  | 2.35981674028547  |
| H | 3.33292521479089  | 3.44758829574599  | 1.60603604088219  |
| O | 4.32856989200539  | 2.73681042135263  | -0.10708868584256 |
| O | 3.51476992310683  | 2.97601090415741  | -2.49294647087656 |

Transition state for oxidation of sulfide **12a** to sulfoxide from **9a** (Transition state for oxidation of sulfide to sulfoxide from outside)

118

|   |                   |                   |                   |
|---|-------------------|-------------------|-------------------|
| C | 1.01134803549236  | 0.46322914847080  | 0.58902991358694  |
| O | 1.33622776664129  | -0.08036130239285 | -0.62027597116009 |
| C | 2.39300554954174  | -0.89241142446387 | -0.80366431517942 |
| C | 3.52235910877183  | -0.88442741365943 | 0.01199705791638  |
| C | 4.58358118254319  | -1.76955045988690 | -0.22956744074214 |
| C | 4.54024955013951  | -2.68779000846608 | -1.28556528647133 |
| C | 3.37011268718930  | -2.71916787626677 | -2.06868903376361 |
| C | 2.31499183341710  | -1.85096654836443 | -1.82188862305488 |
| S | 0.76189477718552  | -2.08648882252705 | -2.71530339485513 |
| C | -0.34891762945379 | -2.52011764938498 | -1.35243336937063 |
| C | 0.20471450898410  | -3.17820238135612 | -0.25292485988678 |
| C | -0.54710978298554 | -3.50018811077395 | 0.88419055454315  |
| C | -1.91487817158844 | -3.21691298243203 | 0.84126453883702  |
| C | -2.47863752883234 | -2.59979997084745 | -0.27299710118076 |
| S | -4.24433026542330 | -2.24744382893572 | -0.21525554000209 |
| C | -4.24637378398692 | -0.45935212189796 | -0.07449776452205 |
| C | -4.78216945192310 | 0.28384864369556  | -1.12136811735523 |
| C | -4.68886297730013 | 1.68430308823265  | -1.14352452477942 |
| C | -3.98346011356112 | 2.29547400538884  | -0.10013061193266 |
| C | -3.43643151318917 | 1.53801434103971  | 0.93640208261832  |
| S | -2.29972879916838 | 2.36283042039122  | 2.05197061975436  |
| C | -0.73327372507624 | 1.47617141262122  | 1.86385451544174  |
| C | 0.10131531686434  | 1.48459745001886  | 2.97983306709394  |
| C | 1.43202857542397  | 1.04881188765713  | 2.93186428786550  |
| C | 1.88352651900343  | 0.55000795043675  | 1.68451430812459  |
| S | 3.62273013391258  | 0.27817629489829  | 1.33654714380114  |
| C | -1.72016017554693 | -2.20043543389095 | -1.38524489667392 |
| C | -3.58258650801286 | 0.15012571545906  | 1.00034818449885  |
| C | -0.30408356261162 | 0.95589634747215  | 0.64183364354948  |
| O | -2.29837935001874 | -1.49080343604184 | -2.37363855901033 |
| C | -2.54123430596223 | -2.15083539124661 | -3.62169672870321 |
| O | -2.95635404822572 | -0.57383334358709 | 1.96052367218722  |
| C | -3.68394945280738 | -0.80540061547405 | 3.17868450008450  |
| O | -1.12009896995878 | 0.81954076686331  | -0.41844542843312 |

|   |                   |                   |                   |
|---|-------------------|-------------------|-------------------|
| C | -0.86984083639558 | 1.58334156982986  | -1.61103033235636 |
| O | 0.35210218208331  | -0.82287010619801 | -3.33014414974800 |
| O | 0.94035200247313  | -3.28626177966697 | -3.54942554390152 |
| O | -4.76614985336231 | -2.83456981227188 | 1.02872737871794  |
| O | -4.85680366845158 | -2.60670946892992 | -1.50214487722822 |
| O | -2.09311843942933 | 3.71635599919376  | 1.51817052102530  |
| O | -2.72088743257057 | 2.18733962542297  | 3.45165323984502  |
| C | 5.67735520686346  | -3.67386502393284 | -1.58417827558066 |
| C | 5.14136638443277  | -5.11416203527379 | -1.43038369506188 |
| C | 6.86616303837929  | -3.48656131280125 | -0.62964261923876 |
| C | 6.16670569557692  | -3.45507922171447 | -3.03170519990092 |
| C | 0.15642485643974  | -4.04206454217392 | 2.13452674045082  |
| C | 1.05102728417389  | -2.91154871532454 | 2.69364383324139  |
| C | 1.02574289594114  | -5.26314524451979 | 1.77439636486053  |
| C | -0.85109943285165 | -4.45265385937699 | 3.21878173983793  |
| C | -5.25413979889643 | 2.46877212294246  | -2.33378071237653 |
| C | -5.11831907964951 | 3.98581913467209  | -2.13273548181143 |
| C | -6.74710778871939 | 2.12522161963914  | -2.51418200207011 |
| C | -4.46825665831308 | 2.06407578322284  | -3.60049683255867 |
| C | 2.33305064615583  | 1.18583436578014  | 4.17666208310495  |
| C | 2.92829809773513  | -0.18530169097711 | 4.56441647151542  |
| C | 1.53446553563287  | 1.69383841743734  | 5.39120469407447  |
| C | 3.44521425349693  | 2.22528755620194  | 3.90336853973870  |
| H | 5.44681897386665  | -1.72715833084246 | 0.43397413391974  |
| H | 3.23410850380465  | -3.45502756968720 | -2.86265698806363 |
| H | 1.26913485963044  | -3.40700876748030 | -0.26324708244211 |
| H | -2.57924926751069 | -3.44883655770259 | 1.67071968659665  |
| H | -5.24262436718932 | -0.27011953260019 | -1.94015875445240 |
| H | -3.78631903657156 | 3.36627832550209  | -0.09136634413703 |
| H | -0.31733269625012 | 1.88373416814643  | 3.90025039564822  |
| H | -3.38281622937569 | -2.84981874636555 | -3.50243544791648 |
| H | -2.80197395708039 | -1.36273776942257 | -4.33886822356901 |
| H | -1.64306038747635 | -2.67825449304288 | -3.97647395888144 |
| H | -3.92243963270185 | 0.15225921819185  | 3.66256872690951  |
| H | -3.00838860385659 | -1.38220090145091 | 3.82417286677725  |
| H | -4.58628518721267 | -1.39620131869461 | 2.96525603997421  |
| H | 0.20558341767380  | 1.73504626748927  | -1.77004566267380 |
| H | -1.37478526313407 | 2.55625902271182  | -1.52163798283770 |
| H | -1.27887385244020 | 0.99326844486942  | -2.43753628169749 |
| H | 4.31809187751582  | -5.32123640804431 | -2.13058587629014 |
| H | 4.76964334473138  | -5.28939567146831 | -0.40802144210763 |
| H | 5.94235826159201  | -5.84281389985078 | -1.63334322515911 |
| H | 7.29573749903718  | -2.47513756847589 | -0.70380186314724 |
| H | 6.58415703155980  | -3.66850665254980 | 0.41949714293822  |
| H | 7.66192694521217  | -4.20272597847826 | -0.88475690543690 |
| H | 5.36085967862947  | -3.61393194147389 | -3.76406926230375 |
| H | 6.55077013388921  | -2.43202850107390 | -3.16809880974832 |
| H | 6.97789297811037  | -4.16166045386807 | -3.26913835888577 |
| H | 1.55250021041384  | -3.23710194434231 | 3.61935162537463  |
| H | 1.83153364288416  | -2.61911472804321 | 1.97382086040580  |
| H | 0.45573514598191  | -2.01285235433688 | 2.91793875215102  |

|   |                   |                   |                   |
|---|-------------------|-------------------|-------------------|
| H | 0.41294964244901  | -6.07283358184499 | 1.34829316745962  |
| H | 1.80946118935920  | -5.01091357486877 | 1.04314760851816  |
| H | 1.52907783095466  | -5.65104627438414 | 2.67434757029399  |
| H | -1.45280871556725 | -3.59694978114905 | 3.56120026967192  |
| H | -0.31506269062540 | -4.85019004967775 | 4.09417826128735  |
| H | -1.54004550464954 | -5.23380061455543 | 2.86170835086178  |
| H | -5.64258899739855 | 4.32416671284621  | -1.22535273651832 |
| H | -5.55929951589290 | 4.51433444287295  | -2.99176756035371 |
| H | -4.06557439417830 | 4.29900777423689  | -2.05831117996031 |
| H | -7.32466223932806 | 2.39253541724225  | -1.61517861741098 |
| H | -7.16525886345226 | 2.68198578227801  | -3.36801622966383 |
| H | -6.90126668375187 | 1.05295157635160  | -2.70823809059301 |
| H | -3.39801607692091 | 2.29557221791517  | -3.48613116127792 |
| H | -4.84774996757514 | 2.61042491998995  | -4.47899659746763 |
| H | -4.55775101201991 | 0.98652849269190  | -3.80775192682517 |
| H | 3.52666609172858  | -0.63290234745203 | 3.75923591044344  |
| H | 3.58306167060793  | -0.07294018758019 | 5.44305427480312  |
| H | 2.12728207037882  | -0.89462816168508 | 4.82315644969357  |
| H | 2.20245098512807  | 1.74135314858718  | 6.26434521143868  |
| H | 1.13326823726589  | 2.70480726556986  | 5.22771077506316  |
| H | 0.69966225841161  | 1.02370906692383  | 5.64671003840337  |
| H | 4.17591180505876  | 1.88996360662679  | 3.15320390648754  |
| H | 4.00971657025766  | 2.41787789695655  | 4.82933300165857  |
| H | 3.01254380739496  | 3.17169286428597  | 3.54780193854713  |
| O | 3.41338692672283  | 2.02004124775617  | -0.02700641879806 |
| H | 3.25521554461124  | 2.59159279492998  | 0.76955195261852  |
| O | 2.62790626770829  | 3.36054410877330  | -0.96980615931256 |
| C | 2.07541168826738  | 4.06942960501236  | -0.05288530728563 |
| O | 2.22475553038450  | 3.95342901664000  | 1.15728869046765  |
| C | 1.07463948749259  | 5.12137447476843  | -0.60487182792375 |
| F | 0.97433452222463  | 6.15526712687502  | 0.22456764514825  |
| F | 1.43717650580982  | 5.57415140950112  | -1.80798492093506 |
| F | -0.13558499992242 | 4.54962747211876  | -0.71974764049242 |

Transition state for oxidation of sulfide **12a** to sulfoxide from **10a** (Transition state for oxidation of sulfide to sulfoxide from inside)

118

|   |                   |                   |                   |
|---|-------------------|-------------------|-------------------|
| C | -0.08236606436745 | -1.45817256051745 | 1.12394134294492  |
| O | 0.31963045886231  | -0.27019284588866 | 1.64233325862651  |
| C | 1.60557910712727  | 0.06252300558941  | 1.88811188430678  |
| C | 2.64591810748071  | -0.85261773813133 | 1.96899853271402  |
| C | 3.94932406219434  | -0.41831718307069 | 2.24545849734077  |
| C | 4.24640996666793  | 0.93700861704627  | 2.41073610680075  |
| C | 3.18779851943562  | 1.85544223956755  | 2.28429041504312  |
| C | 1.89492680222971  | 1.42481157720487  | 2.02156749749563  |
| S | 0.58259335102321  | 2.64510251602114  | 1.79972795570607  |
| C | -0.02285314134025 | 2.28935835173345  | 0.12860487810849  |
| C | 0.89267173914386  | 1.82581449220858  | -0.82075526511086 |
| C | 0.49958504669189  | 1.51496789492194  | -2.13385837178785 |

|   |                   |                   |                   |
|---|-------------------|-------------------|-------------------|
| C | -0.83826198123812 | 1.73078048170845  | -2.47060143472139 |
| C | -1.74554799324922 | 2.20666117745371  | -1.52842038764623 |
| S | -3.45688737420750 | 2.38287473065556  | -2.05669250828656 |
| C | -4.28006594729181 | 1.07347583263194  | -1.13907902602626 |
| C | -5.26481126357630 | 1.43904277423203  | -0.21907056773794 |
| C | -5.86861024842202 | 0.48997224778459  | 0.61356555420551  |
| C | -5.40478021262394 | -0.83283669371698 | 0.52012513279695  |
| C | -4.41806616234685 | -1.18458757800681 | -0.39539177603262 |
| S | -3.71079553057531 | -2.82622464747662 | -0.25854338939827 |
| C | -1.96246159904949 | -2.58631110333078 | 0.16184617012630  |
| C | -1.15456055695158 | -3.70719530831356 | -0.05007176535371 |
| C | 0.17796343932865  | -3.77664397113416 | 0.36722751989623  |
| C | 0.72377913341791  | -2.59629299253896 | 0.95892932597808  |
| S | 2.42243180544671  | -2.54980401848039 | 1.50733757859701  |
| C | -1.37910227192133 | 2.48647135577139  | -0.20434954286672 |
| C | -3.85154383869847 | -0.25111174491270 | -1.27571903038057 |
| C | -1.45120281691682 | -1.45009552984680 | 0.77983736259927  |
| O | -2.32487889360377 | 2.85404867671492  | 0.68644322776074  |
| C | -2.35880019453826 | 4.23014194931487  | 1.08304329126776  |
| O | -2.81730217008563 | -0.59856207298993 | -2.07623717434180 |
| C | -3.13390943299620 | -1.05771309530790 | -3.40280055910970 |
| O | -2.17215984930048 | -0.32942849276042 | 0.96693268440261  |
| C | -2.56842068603891 | 0.01336847773183  | 2.30255526968427  |
| O | -0.46642325975314 | 2.37573026065926  | 2.79024966554529  |
| O | 1.23074178354882  | 3.96580240991601  | 1.77369775806888  |
| O | -3.50785267796235 | 2.05762107406086  | -3.49133403330985 |
| O | -3.99525245186427 | 3.66669422669460  | -1.58429920690384 |
| O | -4.33650410478066 | -3.46599783657301 | 0.90901531399978  |
| O | -3.73477184790353 | -3.51891762049974 | -1.55585257284718 |
| C | 5.67376592580719  | 1.44532224515067  | 2.65368204047816  |
| C | 5.77358710785527  | 1.94041157871322  | 4.11237444670074  |
| C | 5.98268785587090  | 2.60846303889990  | 1.68559499315300  |
| C | 6.71868482465727  | 0.34145970541404  | 2.42282281168512  |
| C | 1.49290651567971  | 0.87878873475877  | -3.11233047953698 |
| C | 0.89030727692666  | 0.71314848338145  | -4.51621998959891 |
| C | 1.84651150399434  | -0.52127134347013 | -2.56214789440635 |
| C | 2.75619730973280  | 1.75543719180941  | -3.22903911106585 |
| C | -6.94080843529997 | 0.85259003179499  | 1.64953640118409  |
| C | -8.22363225373622 | 0.04934012451206  | 1.34951624380132  |
| C | -7.27712095423966 | 2.35126309536362  | 1.61874472585244  |
| C | -6.42307959342207 | 0.49469334796419  | 3.05927117702057  |
| C | 0.93669892117128  | -5.12055799409673 | 0.23941288404807  |
| C | 0.08928190770353  | -6.17162342235561 | -0.50387750254684 |
| C | 1.21747176120228  | -5.67439822444966 | 1.65532657159347  |
| C | 2.25834567621564  | -4.97926314555945 | -0.55338255841640 |
| H | 4.74504404970959  | -1.16096774971187 | 2.25281068558340  |
| H | 3.35503345879168  | 2.93086559811620  | 2.34612437012030  |
| H | 1.93066425036786  | 1.66046845476255  | -0.52280648444186 |
| H | -1.21908104743706 | 1.51929719583226  | -3.46699038464530 |
| H | -5.51287867347011 | 2.49742906305860  | -0.15867256380944 |
| H | -5.76551523673794 | -1.61127211961905 | 1.19344557015858  |

|   |                   |                   |                   |
|---|-------------------|-------------------|-------------------|
| H | -1.61834665327756 | -4.55618476096432 | -0.54522355816806 |
| H | -3.01454197157121 | 4.28236262327467  | 1.96109569297418  |
| H | -1.35672939482445 | 4.58867369663592  | 1.36194302768083  |
| H | -2.77380863652537 | 4.83334436015844  | 0.26133502120991  |
| H | -2.16818599608429 | -1.26501495248598 | -3.88187536989088 |
| H | -3.65921845333625 | -0.26516785615862 | -3.95377603105660 |
| H | -3.72249823349409 | -1.98409633395066 | -3.34817390327506 |
| H | -3.22581431974566 | -0.77361531062233 | 2.70692957684463  |
| H | -3.10944585609857 | 0.96003391446193  | 2.20756580378793  |
| H | -1.69267566024878 | 0.17478533227057  | 2.94419516859449  |
| H | 5.57598816584950  | 1.12162969916080  | 4.82263459568288  |
| H | 5.04664589985720  | 2.74305683025137  | 4.31230695667197  |
| H | 6.78165551226162  | 2.33692251267794  | 4.31556123455775  |
| H | 5.34797288744426  | 3.48636211814750  | 1.87749667820637  |
| H | 7.02869540731801  | 2.92956795856538  | 1.81162657813056  |
| H | 5.82928005899010  | 2.30071319353605  | 0.64156304108386  |
| H | 7.72732436162703  | 0.74924409491530  | 2.58898061596090  |
| H | 6.59221328384820  | -0.50442143079363 | 3.11673439307466  |
| H | 6.68108708170878  | -0.04182402894794 | 1.39130000194253  |
| H | 0.58031207525690  | 1.67838419238080  | -4.94624317271852 |
| H | 1.64396061549895  | 0.27405446529289  | -5.18770459626796 |
| H | 0.01775088798194  | 0.04131516722077  | -4.51626701179307 |
| H | 2.59115601610547  | -1.01402268074942 | -3.20788140847679 |
| H | 2.26956053765964  | -0.47008502151709 | -1.55161182406151 |
| H | 0.94527823777609  | -1.15515295940815 | -2.52033534733916 |
| H | 3.49615359901837  | 1.26833221759264  | -3.88410906412065 |
| H | 3.23886339051198  | 1.92551012919480  | -2.25880122246750 |
| H | 2.50685656934201  | 2.73507352336921  | -3.66650517886383 |
| H | -8.61054793931116 | 0.28863748050097  | 0.34660882893137  |
| H | -9.00679207678512 | 0.29024535500192  | 2.08634280212719  |
| H | -8.04478522055581 | -1.03600166239843 | 1.39315724542592  |
| H | -7.66500015397343 | 2.66306524354312  | 0.63669079185026  |
| H | -8.05167240301899 | 2.57269691262759  | 2.36895088366681  |
| H | -6.39920543614728 | 2.97282809895913  | 1.85400938209806  |
| H | -7.17554219852630 | 0.75753105518227  | 3.81992619225956  |
| H | -5.49741758378784 | 1.04497371521109  | 3.28985845340092  |
| H | -6.21117071645349 | -0.58078215375666 | 3.15889725298948  |
| H | -0.85423942724587 | -6.39102102814414 | 0.01618153716374  |
| H | -0.14418693054301 | -5.86082177796924 | -1.53374613896664 |
| H | 0.65731123257233  | -7.11201600003445 | -0.55949349881832 |
| H | 0.27413208028846  | -5.84546108790458 | 2.19601692471679  |
| H | 1.75146869439934  | -6.63548489054769 | 1.58503426338533  |
| H | 1.83425459140385  | -4.99410231868268 | 2.25965566479680  |
| H | 2.11334934325716  | -4.37868399299540 | -1.46578408107823 |
| H | 2.61178461454771  | -5.97497355838733 | -0.86087416803615 |
| H | 3.06796979891482  | -4.54229884812626 | 0.04609262768253  |
| O | 3.73025376274788  | -2.01822923227885 | -0.19669617732453 |
| H | 3.65684608340469  | -2.83212230391831 | -0.72746127483314 |
| O | 4.91369057263233  | -1.41033405093709 | -1.43291443851862 |
| C | 4.97704940125474  | -0.13534249999093 | -1.27797228757357 |
| O | 4.32464993392140  | 0.60651948692018  | -0.57359784962277 |

|   |                  |                  |                   |
|---|------------------|------------------|-------------------|
| C | 6.11999811465112 | 0.45155410915651 | -2.16691097991080 |
| F | 5.98049826959048 | 0.08463090618094 | -3.44833248986421 |
| F | 6.12144217740129 | 1.78411567462147 | -2.11479483809580 |
| F | 7.31152534487661 | 0.01537614286141 | -1.72955395821887 |

Transition state for oxidation of sulfoxide **9a** (from inside) (Transition state for oxidation of sulfoxide with oxygen out (from inside))

119

|   |                   |                   |                   |
|---|-------------------|-------------------|-------------------|
| C | 0.04907876701546  | 1.01385307369976  | -0.86049162574037 |
| O | 0.21001408046357  | -0.14160127395400 | -1.55802989956316 |
| C | 1.32857219718538  | -0.89714263447084 | -1.48707419574613 |
| C | 2.58709461298429  | -0.38323081338770 | -1.15767944948189 |
| C | 3.70267795105890  | -1.22128257953483 | -1.02717548066795 |
| C | 3.57907801489878  | -2.60788286168133 | -1.22827850962161 |
| C | 2.30665244012124  | -3.11186783579461 | -1.54708904589265 |
| C | 1.19848197689556  | -2.27678946158948 | -1.65942062666785 |
| S | -0.44519605580700 | -3.02461300016705 | -1.72258682564423 |
| C | -1.05859699996121 | -2.57083440830975 | -0.07701693274167 |
| C | -0.10772233579528 | -2.39345129431302 | 0.93560841967567  |
| C | -0.45284265676478 | -1.95927648620391 | 2.21654127329914  |
| C | -1.81925558045106 | -1.80721508505016 | 2.48882529182405  |
| C | -2.76995594324544 | -2.03174802474966 | 1.50086918916275  |
| S | -4.49847409539076 | -1.78329081350167 | 1.94507782380638  |
| C | -4.89569800370368 | -0.30776831970930 | 1.00335715064661  |
| C | -5.85478476522329 | -0.40052417157277 | -0.00690500495569 |
| C | -6.09957825618785 | 0.67102116827310  | -0.87410038724250 |
| C | -5.29705824151027 | 1.81456426023975  | -0.72371015225371 |
| C | -4.34079212336549 | 1.89100128626925  | 0.28350026661490  |
| S | -3.19216133219605 | 3.26441045686224  | 0.25100003545330  |
| C | -1.54311583294755 | 2.52149325159886  | 0.09064426044850  |
| C | -0.49798776636150 | 3.26297314846646  | 0.64711965018624  |
| C | 0.84615767422422  | 2.94470805283755  | 0.43608352019561  |
| C | 1.10293625009691  | 1.79261762563224  | -0.35734878031594 |
| S | 2.72913769221971  | 1.39248021291769  | -1.08266711881966 |
| C | -2.42668713999204 | -2.38076565456192 | 0.18072705096122  |
| C | -4.14072039220615 | 0.85257448949570  | 1.20088284731619  |
| C | -1.30212103321210 | 1.37188991754810  | -0.65702160612796 |
| O | -3.38632342758772 | -2.44658416317080 | -0.76308196555742 |
| C | -3.76276405927140 | -3.74214269974140 | -1.24679901302425 |
| O | -3.14554977265991 | 0.92686957579079  | 2.11777015295435  |
| C | -3.49170212741053 | 1.47548191925493  | 3.40297845861387  |
| O | -2.29286772475920 | 0.56211863635339  | -1.07058561167667 |
| C | -2.58688189624501 | 0.47125759596118  | -2.47242338564582 |
| O | -1.24845121421426 | -2.38160524377381 | -2.76494636654678 |
| O | -0.24551792198206 | -4.48211675179334 | -1.74901240820126 |
| O | -4.54006367136213 | -1.46912250430345 | 3.38179274578547  |
| O | -5.30598315114087 | -2.89183800254744 | 1.41844852934823  |
| O | -3.44171059014807 | 3.99693651664953  | -0.99920997361649 |
| O | -3.20559455467418 | 3.98531764788293  | 1.53318438249933  |

|   |                   |                   |                   |
|---|-------------------|-------------------|-------------------|
| C | 4.79093227255179  | -3.53028352591025 | -1.03600970713690 |
| C | 4.45480444524046  | -4.98664410003433 | -1.39358630216413 |
| C | 5.22234878930780  | -3.47041720016383 | 0.44698689031490  |
| C | 5.95100007015652  | -3.05390197426117 | -1.93598833341176 |
| C | 0.60330096465005  | -1.54433927847666 | 3.24767457109698  |
| C | 0.52732848720707  | -0.00536864623811 | 3.37707878721706  |
| C | 2.02477417140308  | -1.92708262992415 | 2.80313105616211  |
| C | 0.31227271851210  | -2.20220937126986 | 4.60995726616850  |
| C | -7.13820289634219 | 0.60943182122196  | -2.00165823322765 |
| C | -7.88998118395936 | -0.73055054723850 | -2.01115435443303 |
| C | -6.42198681263165 | 0.78020436858323  | -3.35867198629350 |
| C | -8.15979788038391 | 1.74992036986902  | -1.80806881950729 |
| C | 1.95093575109776  | 3.80879715823506  | 1.07288381874836  |
| C | 1.36369361968773  | 4.96895730038491  | 1.89831880800823  |
| C | 2.82780599551536  | 4.45731263715875  | -0.02540766680551 |
| C | 2.76953471669218  | 2.93614187624533  | 2.05196547049574  |
| H | 4.66580791468319  | -0.78780233541329 | -0.74192660467464 |
| H | 2.12850786766189  | -4.18057921373681 | -1.65726274570079 |
| H | 0.93932145468005  | -2.55747735047610 | 0.70113392711797  |
| H | -2.17685322069002 | -1.49174230245243 | 3.46861449287635  |
| H | -6.37440502326723 | -1.35179706181860 | -0.10886758944399 |
| H | -5.36436489292702 | 2.65228349378741  | -1.41887573493982 |
| H | -0.77485881268901 | 4.12371265734301  | 1.25115674978271  |
| H | -4.34537080512825 | -4.26221434746447 | -0.47127551794219 |
| H | -4.38461130490207 | -3.56919164524174 | -2.13384870902227 |
| H | -2.88069587637862 | -4.33369485169055 | -1.53396575647372 |
| H | -3.83495720457990 | 2.51308776795936  | 3.28737326500874  |
| H | -2.56573609501723 | 1.46049447492366  | 3.99225818784098  |
| H | -4.24860891537112 | 0.84078474372044  | 3.88457205341098  |
| H | -1.72018633471899 | 0.10199851149109  | -3.03521918863283 |
| H | -2.92003651939078 | 1.45450497858404  | -2.84159932444813 |
| H | -3.39462132559035 | -0.26398117790591 | -2.54736355408583 |
| H | 3.67193702628024  | -5.40460049984980 | -0.74132569882456 |
| H | 5.35276647369254  | -5.60959813090421 | -1.26584626267165 |
| H | 4.12406063131015  | -5.08936061579423 | -2.43935668474485 |
| H | 6.06691518991358  | -4.15726298754013 | 0.61759426683413  |
| H | 5.55133272374420  | -2.46183481425230 | 0.73091508669371  |
| H | 4.39559653544168  | -3.77733953423092 | 1.10838126293878  |
| H | 6.81063694178871  | -3.73355242167824 | -1.82328424939496 |
| H | 5.65247782549665  | -3.05537263390673 | -2.99659831005882 |
| H | 6.29123519200912  | -2.04623381232848 | -1.66202108055926 |
| H | 1.26842193571515  | 0.35928842754922  | 4.10664740111135  |
| H | 0.72934789597414  | 0.47772487621288  | 2.40839762781859  |
| H | -0.47048999951136 | 0.32209836564973  | 3.70531568589958  |
| H | 2.32148394926743  | -1.41399150077779 | 1.87514535913417  |
| H | 2.74840850471719  | -1.63643375582374 | 3.57948029307452  |
| H | 2.12579252462147  | -3.01218132795133 | 2.64309995780958  |
| H | 1.06097424254369  | -1.88605864311352 | 5.35343796937692  |
| H | 0.34861325388597  | -3.30018693497467 | 4.53259230022859  |
| H | -0.67822905512880 | -1.92237748492074 | 4.99875981978689  |
| H | -8.43102346480706 | -0.90281677330942 | -1.06785549423194 |

|   |                   |                   |                   |
|---|-------------------|-------------------|-------------------|
| H | -7.20997655770186 | -1.58041639819753 | -2.17742693873927 |
| H | -8.63007148632568 | -0.73357257516971 | -2.82586676852471 |
| H | -5.88761858595633 | 1.74010172735227  | -3.42447193632685 |
| H | -5.68982322433673 | -0.02623317918203 | -3.52150307664240 |
| H | -7.15334637458433 | 0.74834149614252  | -4.18195241661037 |
| H | -8.68480951391957 | 1.64797825827979  | -0.84530509392037 |
| H | -8.91141154190180 | 1.72807329383631  | -2.61335484323708 |
| H | -7.67646029060731 | 2.73871993933822  | -1.82726600720619 |
| H | 0.74361521500363  | 4.60820201831129  | 2.73237348589648  |
| H | 2.19084710443005  | 5.55256572862556  | 2.32971613916839  |
| H | 0.75985551580923  | 5.65361301618872  | 1.28414619981408  |
| H | 3.18135516678818  | 3.76913998164225  | -0.80451616597672 |
| H | 2.25064859162972  | 5.22470768150715  | -0.56389067531992 |
| H | 3.70259105055348  | 4.94921246785258  | 0.42876364578711  |
| H | 2.12374171743553  | 2.58983333925985  | 2.87258244037187  |
| H | 3.58790816048451  | 3.52934887374363  | 2.49029062266587  |
| H | 3.22017025647169  | 2.05567844931217  | 1.58177338744824  |
| O | 4.63308378761937  | 1.53642633616839  | -0.11419417588641 |
| H | 4.62585129847562  | 2.51000928875755  | -0.15753939276743 |
| O | 6.30989382835161  | 1.79119831124818  | 0.58090860692412  |
| C | 6.91312454315998  | 0.66027619589110  | 0.55261352223489  |
| O | 2.73355991389203  | 1.95360347261026  | -2.46569827662759 |
| O | 6.53965088871599  | -0.41642751750294 | 0.13118127914129  |
| C | 8.36064174321570  | 0.76399568519125  | 1.13548610113545  |
| F | 9.23678574328548  | 0.82478431153606  | 0.12377239113196  |
| F | 8.53618639842241  | 1.84110000490637  | 1.90450723647799  |
| F | 8.63507907196262  | -0.32043159663586 | 1.86421175614538  |

Transition state for oxidation of sulfoxide **9a** (from outside) (Transition state for oxidation of sulfoxide with oxygen out (from outside))

119

|   |                   |                   |                   |
|---|-------------------|-------------------|-------------------|
| C | 0.04907876701546  | 1.01385307369976  | -0.86049162574037 |
| O | 0.21001408046357  | -0.14160127395400 | -1.55802989956316 |
| C | 1.32857219718538  | -0.89714263447084 | -1.48707419574613 |
| C | 2.58709461298429  | -0.38323081338770 | -1.15767944948189 |
| C | 3.70267795105890  | -1.22128257953483 | -1.02717548066795 |
| C | 3.57907801489878  | -2.60788286168133 | -1.22827850962161 |
| C | 2.30665244012124  | -3.11186783579461 | -1.54708904589265 |
| C | 1.19848197689556  | -2.27678946158948 | -1.65942062666785 |
| S | -0.44519605580700 | -3.02461300016705 | -1.72258682564423 |
| C | -1.05859699996121 | -2.57083440830975 | -0.07701693274167 |
| C | -0.10772233579528 | -2.39345129431302 | 0.93560841967567  |
| C | -0.45284265676478 | -1.95927648620391 | 2.21654127329914  |
| C | -1.81925558045106 | -1.80721508505016 | 2.48882529182405  |
| C | -2.76995594324544 | -2.03174802474966 | 1.50086918916275  |
| S | -4.49847409539076 | -1.78329081350167 | 1.94507782380638  |
| C | -4.89569800370368 | -0.30776831970930 | 1.00335715064661  |
| C | -5.85478476522329 | -0.40052417157277 | -0.00690500495569 |
| C | -6.09957825618785 | 0.67102116827310  | -0.87410038724250 |
| C | -5.29705824151027 | 1.81456426023975  | -0.72371015225371 |



|   |                   |                   |                   |
|---|-------------------|-------------------|-------------------|
| C | -4.34079212336549 | 1.89100128626925  | 0.28350026661490  |
| S | -3.19216133219605 | 3.26441045686224  | 0.25100003545330  |
| C | -1.54311583294755 | 2.52149325159886  | 0.09064426044850  |
| C | -0.49798776636150 | 3.26297314846646  | 0.64711965018624  |
| C | 0.84615767422422  | 2.94470805283755  | 0.43608352019561  |
| C | 1.10293625009691  | 1.79261762563224  | -0.35734878031594 |
| S | 2.72913769221971  | 1.39248021291769  | -1.08266711881966 |
| C | -2.42668713999204 | -2.38076565456192 | 0.18072705096122  |
| C | -4.14072039220615 | 0.85257448949570  | 1.20088284731619  |
| C | -1.30212103321210 | 1.37188991754810  | -0.65702160612796 |
| O | -3.38632342758772 | -2.44658416317080 | -0.76308196555742 |
| C | -3.76276405927140 | -3.74214269974140 | -1.24679901302425 |
| O | -3.14554977265991 | 0.92686957579079  | 2.11777015295435  |
| C | -3.49170212741053 | 1.47548191925493  | 3.40297845861387  |
| O | -2.29286772475920 | 0.56211863635339  | -1.07058561167667 |
| C | -2.58688189624501 | 0.47125759596118  | -2.47242338564582 |
| O | -1.24845121421426 | -2.38160524377381 | -2.76494636654678 |
| O | -0.24551792198206 | -4.48211675179334 | -1.74901240820126 |
| O | -4.54006367136213 | -1.46912250430345 | 3.38179274578547  |
| O | -5.30598315114087 | -2.89183800254744 | 1.41844852934823  |
| O | -3.44171059014807 | 3.99693651664953  | -0.99920997361649 |
| O | -3.20559455467418 | 3.98531764788293  | 1.53318438249933  |
| C | 4.79093227255179  | -3.53028352591025 | -1.03600970713690 |
| C | 4.45480444524046  | -4.98664410003433 | -1.39358630216413 |
| C | 5.22234878930780  | -3.47041720016383 | 0.44698689031490  |
| C | 5.95100007015652  | -3.05390197426117 | -1.93598833341176 |
| C | 0.60330096465005  | -1.54433927847666 | 3.24767457109698  |
| C | 0.52732848720707  | -0.00536864623811 | 3.37707878721706  |
| C | 2.02477417140308  | -1.92708262992415 | 2.80313105616211  |
| C | 0.31227271851210  | -2.20220937126986 | 4.60995726616850  |
| C | -7.13820289634219 | 0.60943182122196  | -2.00165823322765 |
| C | -7.88998118395936 | -0.73055054723850 | -2.01115435443303 |
| C | -6.42198681263165 | 0.78020436858323  | -3.35867198629350 |
| C | -8.15979788038391 | 1.74992036986902  | -1.80806881950729 |
| C | 1.95093575109776  | 3.80879715823506  | 1.07288381874836  |
| C | 1.36369361968773  | 4.96895730038491  | 1.89831880800823  |
| C | 2.82780599551536  | 4.45731263715875  | -0.02540766680551 |
| C | 2.76953471669218  | 2.93614187624533  | 2.05196547049574  |
| H | 4.66580791468319  | -0.78780233541329 | -0.74192660467464 |
| H | 2.12850786766189  | -4.18057921373681 | -1.65726274570079 |
| H | 0.93932145468005  | -2.55747735047610 | 0.70113392711797  |
| H | -2.17685322069002 | -1.49174230245243 | 3.46861449287635  |
| H | -6.37440502326723 | -1.35179706181860 | -0.10886758944399 |
| H | -5.36436489292702 | 2.65228349378741  | -1.41887573493982 |
| H | -0.77485881268901 | 4.12371265734301  | 1.25115674978271  |
| H | -4.34537080512825 | -4.26221434746447 | -0.47127551794219 |
| H | -4.38461130490207 | -3.56919164524174 | -2.13384870902227 |
| H | -2.88069587637862 | -4.33369485169055 | -1.53396575647372 |
| H | -3.83495720457990 | 2.51308776795936  | 3.28737326500874  |
| H | -2.56573609501723 | 1.46049447492366  | 3.99225818784098  |
| H | -4.24860891537112 | 0.84078474372044  | 3.88457205341098  |

|   |                   |                   |                   |
|---|-------------------|-------------------|-------------------|
| H | -1.72018633471899 | 0.10199851149109  | -3.03521918863283 |
| H | -2.92003651939078 | 1.45450497858404  | -2.84159932444813 |
| H | -3.39462132559035 | -0.26398117790591 | -2.54736355408583 |
| H | 3.67193702628024  | -5.40460049984980 | -0.74132569882456 |
| H | 5.35276647369254  | -5.60959813090421 | -1.26584626267165 |
| H | 4.12406063131015  | -5.08936061579423 | -2.43935668474485 |
| H | 6.06691518991358  | -4.15726298754013 | 0.61759426683413  |
| H | 5.55133272374420  | -2.46183481425230 | 0.73091508669371  |
| H | 4.39559653544168  | -3.77733953423092 | 1.10838126293878  |
| H | 6.81063694178871  | -3.73355242167824 | -1.82328424939496 |
| H | 5.65247782549665  | -3.05537263390673 | -2.99659831005882 |
| H | 6.29123519200912  | -2.04623381232848 | -1.66202108055926 |
| H | 1.26842193571515  | 0.35928842754922  | 4.10664740111135  |
| H | 0.72934789597414  | 0.47772487621288  | 2.40839762781859  |
| H | -0.47048999951136 | 0.32209836564973  | 3.70531568589958  |
| H | 2.32148394926743  | -1.41399150077779 | 1.87514535913417  |
| H | 2.74840850471719  | -1.63643375582374 | 3.57948029307452  |
| H | 2.12579252462147  | -3.01218132795133 | 2.64309995780958  |
| H | 1.06097424254369  | -1.88605864311352 | 5.35343796937692  |
| H | 0.34861325388597  | -3.30018693497467 | 4.53259230022859  |
| H | -0.67822905512880 | -1.92237748492074 | 4.99875981978689  |
| H | -8.43102346480706 | -0.90281677330942 | -1.06785549423194 |
| H | -7.20997655770186 | -1.58041639819753 | -2.17742693873927 |
| H | -8.63007148632568 | -0.73357257516971 | -2.82586676852471 |
| H | -5.88761858595633 | 1.74010172735227  | -3.42447193632685 |
| H | -5.68982322433673 | -0.02623317918203 | -3.52150307664240 |
| H | -7.15334637458433 | 0.74834149614252  | -4.18195241661037 |
| H | -8.68480951391957 | 1.64797825827979  | -0.84530509392037 |
| H | -8.91141154190180 | 1.72807329383631  | -2.61335484323708 |
| H | -7.67646029060731 | 2.73871993933822  | -1.82726600720619 |
| H | 0.74361521500363  | 4.60820201831129  | 2.73237348589648  |
| H | 2.19084710443005  | 5.55256572862556  | 2.32971613916839  |
| H | 0.75985551580923  | 5.65361301618872  | 1.28414619981408  |
| H | 3.18135516678818  | 3.76913998164225  | -0.80451616597672 |
| H | 2.25064859162972  | 5.22470768150715  | -0.56389067531992 |
| H | 3.70259105055348  | 4.94921246785258  | 0.42876364578711  |
| H | 2.12374171743553  | 2.58983333925985  | 2.87258244037187  |
| H | 3.58790816048451  | 3.52934887374363  | 2.49029062266587  |
| H | 3.22017025647169  | 2.05567844931217  | 1.58177338744824  |
| O | 4.63308378761937  | 1.53642633616839  | -0.11419417588641 |
| H | 4.62585129847562  | 2.51000928875755  | -0.15753939276743 |
| O | 6.30989382835161  | 1.79119831124818  | 0.58090860692412  |
| C | 6.91312454315998  | 0.66027619589110  | 0.55261352223489  |
| O | 2.73355991389203  | 1.95360347261026  | -2.46569827662759 |
| O | 6.53965088871599  | -0.41642751750294 | 0.13118127914129  |
| C | 8.36064174321570  | 0.76399568519125  | 1.13548610113545  |
| F | 9.23678574328548  | 0.82478431153606  | 0.12377239113196  |
| F | 8.53618639842241  | 1.84110000490637  | 1.90450723647799  |
| F | 8.63507907196262  | -0.32043159663586 | 1.86421175614538  |

Trifluoroperoxoacetic acid

9

|   |                   |                   |                   |
|---|-------------------|-------------------|-------------------|
| C | 0.56459126943917  | -0.35773085655753 | 0.00034459342686  |
| O | 0.96574909205356  | -1.49055956594137 | 0.00305544004151  |
| O | 1.34645909186742  | 0.72173035489177  | -0.00133487175621 |
| C | -0.92261047138325 | 0.06475886708013  | -0.00006326076901 |
| F | -1.19644979509997 | 0.79024171717619  | -1.08654568433336 |
| F | -1.68816119836450 | -1.01775820379571 | 0.00229213421873  |
| F | -1.19596552397786 | 0.79467097026576  | 1.08354158821554  |
| O | 2.72842255581843  | 0.36930658915133  | -0.00081666562443 |
| H | 2.67418335874701  | -0.61664657667056 | 0.00058920818037  |

Trifluoroacetic acid

8

|   |                   |                   |                   |
|---|-------------------|-------------------|-------------------|
| C | 0.99430540600664  | 0.10738518305573  | 0.00005802846824  |
| O | 1.59595520401027  | 1.14205703487140  | 0.00002592152197  |
| O | 1.52764634365881  | -1.11531039837685 | 0.00005435191263  |
| H | 2.49617085132030  | -1.01686296984980 | 0.00001121103050  |
| C | -0.54825681991050 | 0.00957585301401  | -0.00002023231498 |
| F | -0.96841518276934 | -0.64916664626090 | -1.08652008567263 |
| F | -0.96850129594955 | -0.65095441637048 | 1.08534650716807  |
| F | -1.08615357146664 | 1.22258376891689  | 0.00094736268620  |

## Energies of structures

|                                                                                   | GFN-xTB2   | B3LYP/def2-<br>SVP D3BJ | HF/def2-<br>QZVPP | DLPNO-<br>MP2/def2-<br>QZVPP | DLPNO-<br>CCSD(T)/def2-<br>QZVPP |
|-----------------------------------------------------------------------------------|------------|-------------------------|-------------------|------------------------------|----------------------------------|
| Phenoxathiin – S as sulfide                                                       | -172.28373 | -4011.0459              | -3998.21029       | -4009.14651                  | -4009.73259                      |
| Phenoxathiin – S as sulfoxide, oxygen out                                         | -176.32979 | -4086.1219              | -4073.05154       | -4084.25825                  | -4084.84581                      |
| Phenoxathiin – S as sulfoxide, oxygen in                                          | -176.32865 | -4086.121               | -4073.04048       | -4084.25277                  | -4084.84049                      |
| Phenoxathiin – S as sulfone                                                       | -180.39608 | -4161.2347              | -4147.94278       | -4159.41383                  | -4160.00152                      |
| Transition state for oxidation of sulfide to sulfoxide from outside               | -203.37656 | -4612.2734              | -4597.54277       | -4610.44335                  | -4611.07957                      |
| Transition state for oxidation of sulfide to sulfoxide from inside                | -203.38147 | -4612.2762              | -4597.53563       | -4610.44235                  | -4611.0762                       |
| Transition state for oxidation of sulfoxide with oxygen out (attack from inside)  | -207.4314  | -4687.3467              | -4672.38728       | -4685.55212                  | -4686.18818                      |
| Transition state for oxidation of sulfoxide with oxygen out (attack from outside) | -207.4295  | -4687.3453              | -4672.38809       | -4685.54762                  | -4686.18456                      |
| Trifluoroperoxoacetic acid                                                        | -31.09291  | -601.22606              | -599.408559       | -601.309435                  | -601.367085                      |
| Trifluoroacetic acid                                                              | -27.11498  | -526.19473              | -524.628914       | -526.27129                   | -526.319247                      |
